# Supplementary material for: Isolation, Structural Analysis and Biological Activity Assays of Biselisabethoxanes A and B: Two Dissymmetric Bis-Diterpenes from the Southwestern Caribbean Sea Gorgonian Coral Pseudopterogorgia elisabethae
Source: MDPI journal article supplement (doi:10.3390/molecules27227879), 2022-11-15
Supplement: s1 [file s1]

## **SUPPLEMENTARY MATERIALS**

### **Isolation, Structural Analysis and Biological Activity Assays of Biselisabethoxanes A and B: Two Dissymmetric *Bis*-Diterpenes from the Southwestern Caribbean Sea Gorgonian Coral *Pseudopterogorgia elisabethae***

Ileana I. Rodríguez,<sup>a</sup> Abimael D. Rodríguez,<sup>ab\*</sup> and Charles L. Barnes<sup>c</sup>

<sup>a</sup> *Department of Chemistry, University of Puerto Rico, PO Box 23346, UPR Station, San Juan, Puerto Rico 00931-3346, USA*

<sup>b</sup> *Molecular Sciences Research Center, University of Puerto Rico, 1390 Ponce de León Avenue, San Juan, Puerto Rico 00926, USA*

<sup>c</sup> *Department of Chemistry, University of Missouri-Columbia, Columbia, Missouri 65211*

#### **Corresponding Author**

\*Tel: (787)-523-5320

E-mail: Abimael.rodriguez1@upr.edu

## List of Supplementary Materials

| Index                                                                                                                   | Pages |
|-------------------------------------------------------------------------------------------------------------------------|-------|
| Table S1. $^1\text{H}$ - $^1\text{H}$ COSY, HMBC and NOESY (500 MHz, $\text{CDCl}_3$ ) data for biselisabethoxane A (1) | 3     |
| Table S2. $^1\text{H}$ - $^1\text{H}$ COSY, HMBC and NOESY (500 MHz, $\text{CDCl}_3$ ) data for biselisabethoxane B (2) | 4     |
| Table S3. Charge distribution of <i>ortho</i> -benzoquinone 7                                                           | 5     |
| Table S4. Molecular orbital energies for reactants 7 and 7a                                                             | 7     |
| Table S5. Crystal and structure refinement data for 1                                                                   | 8     |
| Figure S1. Predicted structures from self-same dimerization of <i>ortho</i> -benzoquinone 7                             | 9     |
| Figure S2. $^1\text{H}$ NMR (500 MHz, $\text{CDCl}_3$ ) spectrum of 1                                                   | 10    |
| Figure S3. $^1\text{H}$ NMR (500 MHz, $\text{CDCl}_3$ ) spectrum of 1 ( <i>expansion</i> )                              | 11    |
| Figure S4. $^{13}\text{C}$ NMR (125 MHz, $\text{CDCl}_3$ ) spectrum of 1                                                | 12    |
| Figure S5. $^{13}\text{C}$ NMR (125 MHz, $\text{CDCl}_3$ ) spectrum of 1 ( <i>expansion</i> )                           | 13    |
| Figure S6. COSY spectrum of 1                                                                                           | 14    |
| Figure S7. HMQC spectrum of 1                                                                                           | 15    |
| Figure S8. HMBC spectrum of 1                                                                                           | 16    |
| Figure S9. HMBC spectrum of 1 ( <i>expansion</i> )                                                                      | 17    |
| Figure S10. HMBC spectrum of 1 ( <i>expansion</i> )                                                                     | 18    |
| Figure S11. NOESY spectrum of 1                                                                                         | 19    |
| Figure S12. IR spectrum of 1                                                                                            | 20    |
| Figure S13. $^1\text{H}$ NMR (500 MHz, $\text{CDCl}_3$ ) spectrum of 2                                                  | 21    |
| Figure S14. $^1\text{H}$ NMR (500 MHz, $\text{CDCl}_3$ ) spectrum of 2 ( <i>expansion</i> )                             | 22    |
| Figure S15. $^{13}\text{C}$ NMR (125 MHz, $\text{CDCl}_3$ ) spectrum of 2                                               | 23    |
| Figure S16. $^{13}\text{C}$ NMR (125 MHz, $\text{CDCl}_3$ ) spectrum of 2 ( <i>expansion</i> )                          | 24    |
| Figure S17. COSY spectrum of 2                                                                                          | 25    |
| Figure S18. HMQC spectrum of 2                                                                                          | 26    |
| Figure S19. HMQC spectrum of 2 ( <i>expansion</i> )                                                                     | 27    |
| Figure S20. HMBC spectrum of 2                                                                                          | 28    |
| Figure S21. HMBC spectrum of 2 ( <i>expansion</i> )                                                                     | 29    |
| Figure S22. HMBC spectrum of 2 ( <i>expansion</i> )                                                                     | 30    |
| Figure S23. NOESY spectrum of 2                                                                                         | 31    |
| Figure S24. IR spectrum of 2                                                                                            | 32    |

**Table S1.**  $^1\text{H}$  NMR (500 MHz),  $^{13}\text{C}$  NMR (125 MHz),  $^1\text{H}$ - $^1\text{H}$  COSY, HMBC, and NOESY spectroscopic data for biselisabethoxane A (1) in  $\text{CDCl}_3^a$

| Atom         | $\delta_{\text{H}}$ | $\delta_{\text{C}}$ | $^1\text{H}$ - $^1\text{H}$ COSY       | HMBC <sup>c</sup>                                    | NOESY             |
|--------------|---------------------|---------------------|----------------------------------------|------------------------------------------------------|-------------------|
| 1            | 3.60                | 36.8                | H2 $\alpha$ $\beta$ , H14              |                                                      | Me20              |
| 2 $\alpha$   | 1.22                | 40.2                | H1, H2 $\beta$ , H3                    | H1, Me18                                             | H4                |
| 2 $\beta$    | 1.94                |                     | H1, H2 $\alpha$                        |                                                      |                   |
| 3            | 1.21                | 34.0                | H2 $\alpha$ , H4, Me18                 | H5 $\beta$ , Me18                                    | H5 $\beta$ , Me18 |
| 4            | 2.01                | 44.6                | H3, H5 $\alpha$                        | H2 $\alpha$ $\beta$ , H3, H6 $\alpha$ $\beta$ , Me18 | H2 $\alpha$       |
| 5 $\alpha$   | 0.95                | 27.7                | H4, H5 $\beta$ , H6 $\alpha$ $\beta$   |                                                      | Me18              |
| 5 $\beta$    | 2.03                |                     | H5 $\alpha$ , H6 $\beta$               |                                                      | H3, H7            |
| 6 $\alpha$   | 2.15                | 32.0                | H5 $\alpha$ , H6 $\beta$ , H7          | H7, Me19                                             |                   |
| 6 $\beta$    | 1.30                |                     | H5 $\alpha$ $\beta$ , H6 $\alpha$ , H7 |                                                      |                   |
| 7            | 3.20                | 28.6                | H6 $\alpha$ $\beta$ , Me19             | H5 $\beta$ , H6 $\alpha$ $\beta$ , Me19              | H5 $\beta$ , Me19 |
| 8            |                     | 126.2               |                                        | H7, Me19, C9-OH                                      |                   |
| 9            |                     | 147.1               |                                        | H7, C9-OH                                            |                   |
| 10           |                     | 137.2               |                                        | Me20, C9-OH                                          |                   |
| 11           |                     | 129.6               |                                        | H1, Me20                                             |                   |
| 12           |                     | 129.6               |                                        | H1, H14, Me20                                        |                   |
| 13           |                     | 135.9               |                                        | H1, H5 $\beta$ , H7                                  |                   |
| 14           | 4.94                | 131.4               | H1, Me16, Me17                         | H1, Me16, Me17                                       | Me16              |
| 15           |                     | 128.3               |                                        | H1, Me16, Me17                                       |                   |
| 16           | 1.66                | 25.4                | H14                                    | H14, Me17                                            | H14               |
| 17           | 1.70                | 17.5                | H14                                    | H14, Me16                                            |                   |
| 18           | 1.02                | 20.0                | H3                                     | H3                                                   | H3, H5 $\alpha$   |
| 19           | 1.25                | 23.1                | H7                                     | H7                                                   | H7                |
| 20           | 1.96                | 15.6                |                                        |                                                      | H1                |
| 9-OH         | 5.97                |                     |                                        |                                                      |                   |
| 1'           |                     | 61.6                |                                        | H5 $\alpha$ ', H6', H8 $\alpha$ '                    |                   |
| 2'           |                     | 141.1               |                                        | H3', H4 $\alpha$ ', Me18', C17'-OH                   |                   |
| 3'           | 3.14                | 28.7                | H4 $\beta$ ', Me18'                    | H5 $\alpha$ ', Me18'                                 |                   |
| 4 $\alpha$ ' | 1.46                | 24.3                | H4 $\beta$ ', H5 $\alpha$ $\beta$ '    | H3', H5 $\beta$ ', H6', Me18'                        |                   |
| 4 $\beta$ '  | 1.78                |                     | H3', H4 $\alpha$ ', H5 $\alpha$ '      |                                                      |                   |
| 5 $\alpha$ ' | 1.55                | 19.3                | H4 $\alpha$ $\beta$ ', H5 $\beta$ '    | H3'                                                  |                   |
| 5 $\beta$ '  | 1.80                |                     | H4 $\alpha$ ', H5 $\alpha$ ', H6'      |                                                      |                   |
| 6'           | 2.35                | 40.3                | H5 $\beta$ ', H7'                      | H8 $\alpha$ ', Me19'                                 | Me18', Me19'      |
| 7'           | 2.05                | 41.7                | H6', H8 $\alpha$ $\beta$ ', Me19'      | H6', H8 $\beta$ ', Me19'                             |                   |
| 8 $\alpha$ ' | 2.22                | 44.5                | H7', H8 $\beta$ '                      | Me19'                                                |                   |
| 8 $\beta$ '  | 0.97                |                     | H7', H8 $\alpha$ '                     |                                                      |                   |
| 9'           | — <sup>b</sup>      | 53.4 <sup>b</sup>   |                                        | H8 $\alpha$ $\beta$ '                                |                   |
| 10'          | — <sup>b</sup>      | 60.7 <sup>b</sup>   |                                        | Me12', Me13', Me20'                                  | Me19', Me20'      |
| 11'          |                     | ~85.0 <sup>b</sup>  |                                        | Me12', Me13'                                         |                   |
| 12'          | 1.01                | 26.8 <sup>b</sup>   |                                        | Me13'                                                | Me13'             |
| 13'          | 1.02                | 26.9 <sup>b</sup>   |                                        | Me12'                                                | Me12'             |
| 14'          |                     | 203.1               |                                        | H6', H9', Me20'                                      |                   |
| 15'          |                     | 69.2 <sup>b</sup>   |                                        | Me20'                                                |                   |
| 16'          |                     | ~196.0 <sup>b</sup> |                                        | Me20'                                                |                   |
| 17'          |                     | 146.9               |                                        | H3', C17'-OH                                         |                   |
| 18'          | 1.16                | 17.7                | H3'                                    |                                                      | H6'               |
| 19'          | 1.06                | 18.1                | H7'                                    | H6'                                                  | H6', H10'         |
| 20'          | 1.66                | 15.6                |                                        |                                                      | H10'              |
| 17'-OH       | 6.18                |                     |                                        |                                                      |                   |

<sup>a</sup> Spectra were recorded at 25°C. Chemical shift values are in ppm relative to TMS (0.00 ppm) or  $\text{CDCl}_3$  (77.0 ppm) signals.

<sup>b</sup> Detection of this signal was complicated by the increased linewidths associated with slower tumbling, and the spectral overlap from the large number of unique signals. Either this signal was not detected, or it appeared as a broad low intensity signal. <sup>c</sup> Protons correlated to carbon resonances in  $^{13}\text{C}$  column. Parameters were optimized for  $^2J = 6$  and 8 Hz.

**Table S2.**  $^1\text{H}$  NMR (500 MHz),  $^{13}\text{C}$  NMR (125 MHz),  $^1\text{H}$ - $^1\text{H}$  COSY, HMBC, and NOESY spectroscopic data for biselisabethoxane B (**2**) in  $\text{CDCl}_3$ <sup>a</sup>

| Atom         | $\delta_{\text{H}}$ | $\delta_{\text{C}}$ | $^1\text{H}$ - $^1\text{H}$ COSY       | HMBC <sup>b</sup>                                    | NOESY                              |
|--------------|---------------------|---------------------|----------------------------------------|------------------------------------------------------|------------------------------------|
| 1            | 3.65                | 36.7                | H2 $\alpha$ $\beta$ , H14              |                                                      | Me20                               |
| 2 $\alpha$   | 1.18                | 40.3                | H1, H2 $\beta$ , H3                    | H1, Me18                                             | H4                                 |
| 2 $\beta$    | 1.94                |                     | H1, H2 $\alpha$                        |                                                      |                                    |
| 3            | 1.20                | 34.2                | H2 $\alpha$ , H4, Me18                 | H5 $\beta$ , Me18                                    | H5 $\beta$ , Me18                  |
| 4            | 1.98                | 44.4                | H3, H5 $\alpha$                        | H2 $\alpha$ $\beta$ , H3, H6 $\alpha$ $\beta$ , Me18 | H2 $\alpha$                        |
| 5 $\alpha$   | 0.97                | 28.3                | H4, H5 $\beta$ , H6 $\alpha$ $\beta$   |                                                      | Me18                               |
| 5 $\beta$    | 2.07                |                     | H5 $\alpha$ , H6 $\beta$               |                                                      | H3, H7                             |
| 6 $\alpha$   | 2.17                | 31.8                | H5 $\alpha$ , H6 $\beta$ , H7          | H7, Me19                                             |                                    |
| 6 $\beta$    | 1.30                |                     | H5 $\alpha$ $\beta$ , H6 $\alpha$ , H7 |                                                      |                                    |
| 7            | 3.35                | 27.6                | H6 $\alpha$ $\beta$ , Me19             | H5 $\beta$ , H6 $\alpha$ $\beta$ , Me19              | H5 $\beta$ , H14', Me16', Me-17'   |
| 8            |                     | 126.3               |                                        | H7, Me19, C9-OH                                      |                                    |
| 9            |                     | 137.2               |                                        | H7, C9-OH                                            |                                    |
| 10           |                     | 137.8               |                                        | Me20, C9-OH                                          |                                    |
| 11           |                     | 122.3               |                                        | H1, Me20                                             |                                    |
| 12           |                     | 129.7               |                                        | H1, H14, Me20                                        |                                    |
| 13           |                     | 132.3               |                                        | H1, H5 $\beta$ , H7                                  |                                    |
| 14           | 5.00                | 131.8               | H1, Me16, Me17                         | H1, Me16, Me17                                       | Me16                               |
| 15           |                     | 127.6               |                                        | H1, Me16, Me17                                       |                                    |
| 16           | 1.63                | 25.3                | H14                                    | H14, Me17                                            | H14                                |
| 17           | 1.68                | 17.5                | H14                                    | H14, Me16                                            |                                    |
| 18           | 1.00                | 20.0                | H3                                     | H3                                                   | H3, H5 $\alpha$                    |
| 19           | 1.21                | 23.3                | H7                                     | H7                                                   | H7, Me20'                          |
| 20           | 1.84                | 11.5                |                                        |                                                      | H1                                 |
| 1'           |                     | 144.7               |                                        | H2 $\alpha$ $\beta$ '                                |                                    |
| 2 $\alpha$ ' | 1.82                | 42.2                | H2 $\beta$ ', H3'                      | Me18'                                                | H2 $\beta$ ', Me18'                |
| 2 $\beta$ '  | 2.12                |                     | H2 $\alpha$ '                          |                                                      | H2 $\alpha$ ', Me18'               |
| 3'           | 1.36                | 32.8                | H2 $\alpha$ ', H4', Me18'              | Me18'                                                | H5 $\alpha$ $\beta$ ', Me18'       |
| 4'           | 1.80                | 44.2                | H3', H5 $\alpha$ '                     | H2 $\beta$ ', Me18'                                  | H5 $\beta$ ', H6 $\beta$ ', Me18'  |
| 5 $\alpha$ ' | 1.17                | 25.3                | H4', H5 $\beta$ ', H6 $\alpha$ '       |                                                      | H3', H7'                           |
| 5 $\beta$ '  | 2.00                |                     | H5 $\alpha$ ', H6 $\beta$ '            |                                                      | H4', H6 $\beta$ '                  |
| 6 $\alpha$ ' | 2.09                | 31.0                | H5 $\alpha$ ', H6 $\beta$ ', H7'       | Me19'                                                | H7'                                |
| 6 $\beta$ '  | 1.12                |                     | H5 $\beta$ ', H6 $\alpha$ ', H7'       |                                                      | H4', H5 $\beta$ '                  |
| 7'           | 2.82                | 29.3                | H6 $\alpha$ $\beta$ ', Me19'           | Me19'                                                | H5 $\beta$ ', H6 $\alpha$ ', Me19' |
| 8'           |                     | 129.3               |                                        | Me19'                                                |                                    |
| 9'           |                     | 191.2               |                                        | C10'-OH                                              |                                    |
| 10'          |                     | 90.1                |                                        | C10'-OH, Me20'                                       |                                    |
| 11'          |                     | 78.8                |                                        | C10'-OH, Me20'                                       |                                    |
| 12'          |                     | 132.5               |                                        | H2 $\alpha$ $\beta$ , H14', Me20'                    |                                    |
| 13'          |                     | 157.9               |                                        | H5 $\beta$ '                                         |                                    |
| 14'          | 5.71                | 126.4               | Me16', Me17'                           | Me16', Me17'                                         | H7, Me16', Me20'                   |
| 15'          |                     | 129.4               |                                        | Me16', Me17'                                         |                                    |
| 16'          | 1.76                | 25.3                | H14'                                   | H14', Me17'                                          | H7, H14'                           |
| 17'          | 1.50                | 19.6                | H14'                                   | H14', Me16'                                          | H7                                 |
| 18'          | 0.95                | 19.1                | H3'                                    |                                                      | H2 $\alpha$ $\beta$ ', H3', H4'    |
| 19'          | 1.22                | 22.0                | H7'                                    |                                                      | H7'                                |
| 20'          | 1.45                | 21.0                |                                        |                                                      | 10'-OH, H14', Me19                 |
| 10'-OH       | 4.70                |                     |                                        |                                                      | Me20'                              |

<sup>a</sup> Spectra were recorded at 25°C. Chemical shift values are in ppm relative to TMS (0.00 ppm) or  $\text{CDCl}_3$  (77.0 ppm) signals. <sup>b</sup> Protons correlated to carbon resonances in  $^{13}\text{C}$  column. Parameters were optimized for  $^2,3J = 6$  and 8 Hz.



**Table S3.** Charge distributions of *ortho*-benzoquinone 7.

Job type: Equilibrium Geometry  
 Method:  $\omega$ B97X-D Basis set: 6-31G\*  
 Energy: -927.944232 hartrees

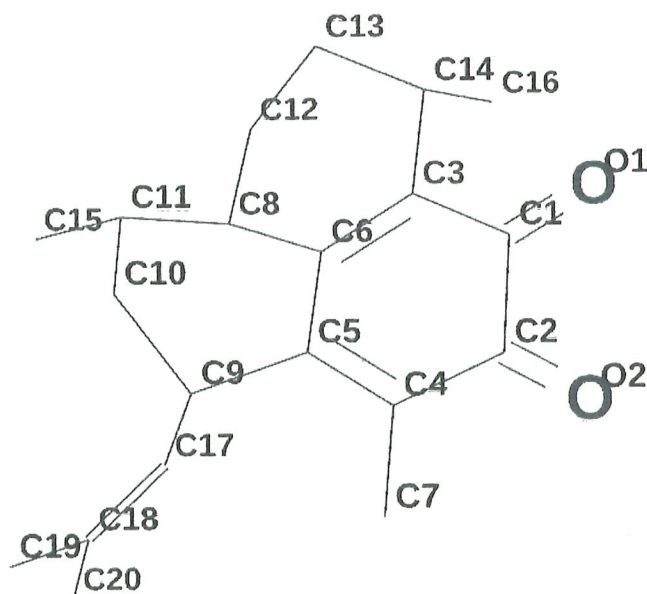

| Atom Label | Natural charge | Mulliken charge | Electrostatic charge |
|------------|----------------|-----------------|----------------------|
| C1         | +0.490         | +0.358          | +0.465               |
| C2         | +0.486         | +0.362          | +0.354               |
| C3         | -0.102         | -0.010          | -0.366               |
| C4         | -0.096         | +0.013          | +0.190               |
| C5         | +0.035         | +0.052          | -0.555               |
| C6         | +0.024         | +0.066          | +0.243               |
| C7         | -0.728         | -0.583          | -0.597               |
| C8         | -0.284         | -0.195          | -0.157               |
| C9         | -0.310         | -0.240          | +0.957               |
| C10        | -0.456         | -0.319          | -1.108               |
| C11        | -0.254         | -0.108          | +0.748               |
| C12        | -0.464         | -0.327          | -0.189               |
| C13        | -0.466         | -0.316          | -0.519               |
| C14        | -0.284         | -0.173          | +0.485               |
| C15        | -0.691         | -0.509          | -0.888               |
| C16        | -0.688         | -0.505          | -0.708               |
| C17        | -0.247         | -0.188          | -0.671               |
| C18        | +0.000         | +0.153          | +0.544               |
| C19        | -0.719         | -0.561          | -0.800               |
| C20        | -0.708         | -0.554          | -0.798               |
| H1         | +0.252         | +0.184          | +0.155               |
| H2         | +0.250         | +0.156          | -0.010               |
| H3         | +0.251         | +0.183          | +0.164               |

|     |        |        |        |
|-----|--------|--------|--------|
| H4  | +0.273 | +0.214 | +0.190 |
| H5  | +0.240 | +0.165 | +0.209 |
| H6  | +0.266 | +0.171 | +0.089 |
| H7  | +0.240 | +0.158 | +0.128 |
| H8  | +0.246 | +0.162 | +0.098 |
| H9  | +0.271 | +0.172 | -0.026 |
| H10 | +0.244 | +0.173 | +0.217 |
| H11 | +0.250 | +0.166 | +0.215 |
| H12 | +0.244 | +0.164 | +0.109 |
| H13 | +0.250 | +0.161 | +0.168 |
| H14 | +0.239 | +0.171 | +0.220 |
| H15 | +0.278 | +0.184 | +0.019 |
| H16 | +0.238 | +0.164 | +0.165 |
| H17 | +0.235 | +0.163 | +0.186 |
| H18 | +0.250 | +0.164 | +0.267 |
| H19 | +0.227 | +0.157 | +0.190 |
| H20 | +0.256 | +0.195 | +0.201 |
| H21 | +0.231 | +0.150 | +0.209 |
| H22 | +0.240 | +0.176 | +0.184 |
| H23 | +0.249 | +0.178 | +0.220 |
| H24 | +0.250 | +0.180 | +0.219 |
| H25 | +0.245 | +0.175 | +0.215 |
| H26 | +0.244 | +0.176 | +0.202 |
| O1  | -0.500 | -0.440 | -0.428 |
| O2  | -0.496 | -0.439 | -0.403 |

**Table S4.** HOMO-LUMO energies for the heterodiene **7** and heterodienophile **7a**.

| Reactant                       | HOMO Energy (eV) | LUMO Energy (eV) |
|--------------------------------|------------------|------------------|
| <i>ortho</i> -Quinone <b>7</b> | −8.23            | −1.06            |
| Enol <b>7a</b>                 | −7.28            | −0.45            |

# Table S5. Crystal and structure refinement data for 1

8

Table 1. Crystal data and structure refinement

|                                   |                                                                                       |
|-----------------------------------|---------------------------------------------------------------------------------------|
| Identification code               | Ito-f4126                                                                             |
| Empirical formula                 | C20 H27 O2.50 ✓                                                                       |
| Formula weight                    | 307.42 ✓                                                                              |
| Temperature                       | 173(2) K ✓                                                                            |
| Wavelength                        | 0.71073 Å ✓                                                                           |
| Crystal system, space group       | Monoclinic, P2~1~                                                                     |
| Unit cell dimensions              | a = 12.1072(6) Å    alpha = 90 deg.<br>b = 10.5771(6) Å    beta =<br>95.6550(10) deg. |
| Volume                            | c = 27.4452(14) Å    gamma = 90 deg.<br>3497.5(3) Å <sup>3</sup> ✓                    |
| Z, Calculated density             | 8, 1.168 Mg/m <sup>3</sup> ✓                                                          |
| Absorption coefficient            | 0.075 mm <sup>-1</sup> ✓                                                              |
| F(000)                            | 1336                                                                                  |
| Crystal size                      | 0.50 x 0.25 x 0.05 mm ✓                                                               |
| Theta range for data collection   | 1.69 to 27.13 deg.                                                                    |
| Limiting indices                  | -14<=h<=15, -13<=k<=13, -35<=l<=28                                                    |
| Reflections collected / unique    | 22255 / <u>8141</u> [R(int) = 0.0757] ✓                                               |
| Completeness to theta = 27.13     | 99.4 %                                                                                |
| Absorption correction             | Semi-empirical from equivalents                                                       |
| Max. and min. transmission        | 0.98 and 0.85                                                                         |
| Refinement method                 | Full-matrix least-squares on F <sup>2</sup>                                           |
| Data / restraints / parameters    | 8141 / 1 / 848 ✓                                                                      |
| Goodness-of-fit on F <sup>2</sup> | 0.847 ✓                                                                               |
| Final R indices [I>2sigma(I)]     | R1 = 0.0440, wR2 = 0.0689 ✓                                                           |
| R indices (all data)              | R1 = 0.1356, wR2 = 0.0872                                                             |
| Absolute structure parameter      | 0(10)                                                                                 |
| Extinction coefficient            | 0.00038(10)                                                                           |
| Largest diff. peak and hole       | 0.181 and -0.182 e.Å <sup>-3</sup>                                                    |



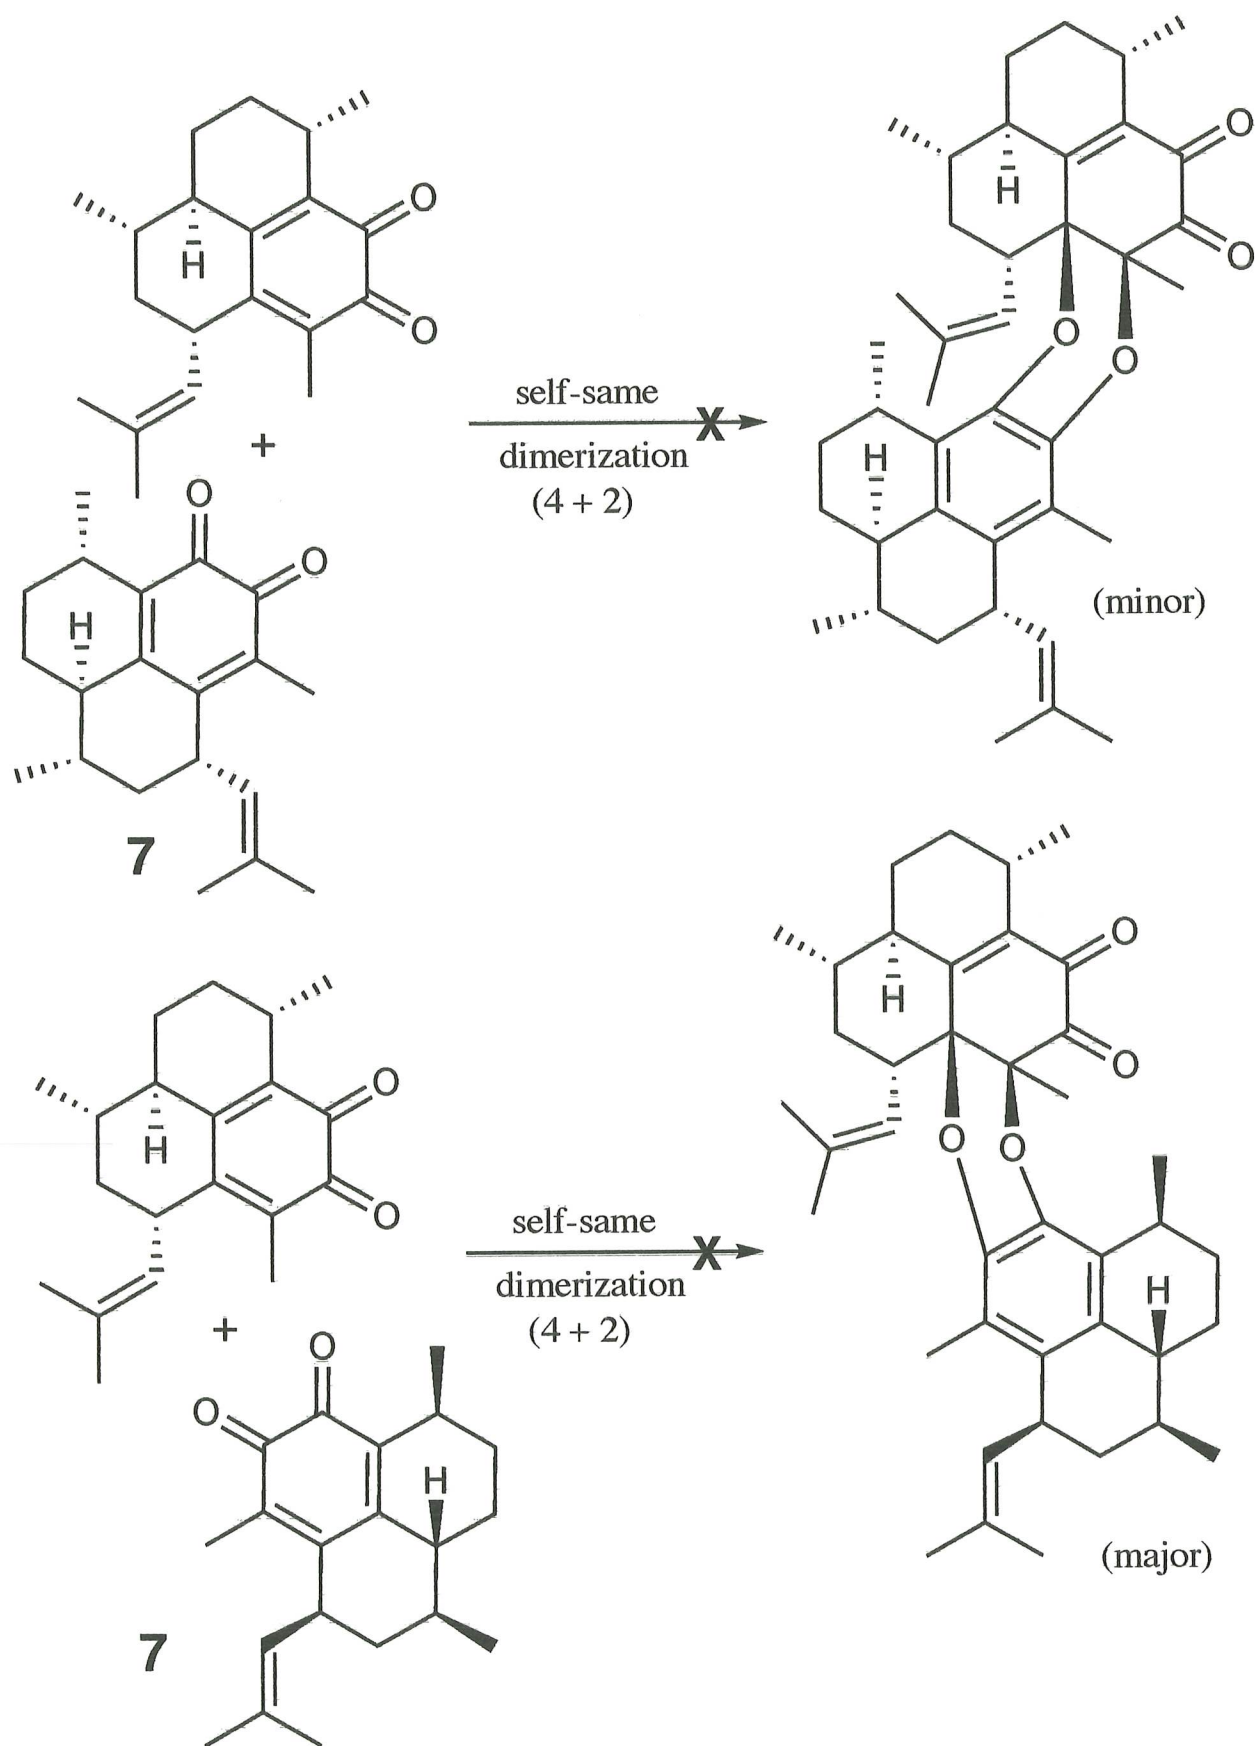

**Figure S1.** Predicted structures from self-same dimerization of *ortho*-benzoquinone **7** (not detected).

## Bisditerpene A

Figure S2. <sup>1</sup>H NMR (500 MHz, CDCl<sub>3</sub>) spectrum of 1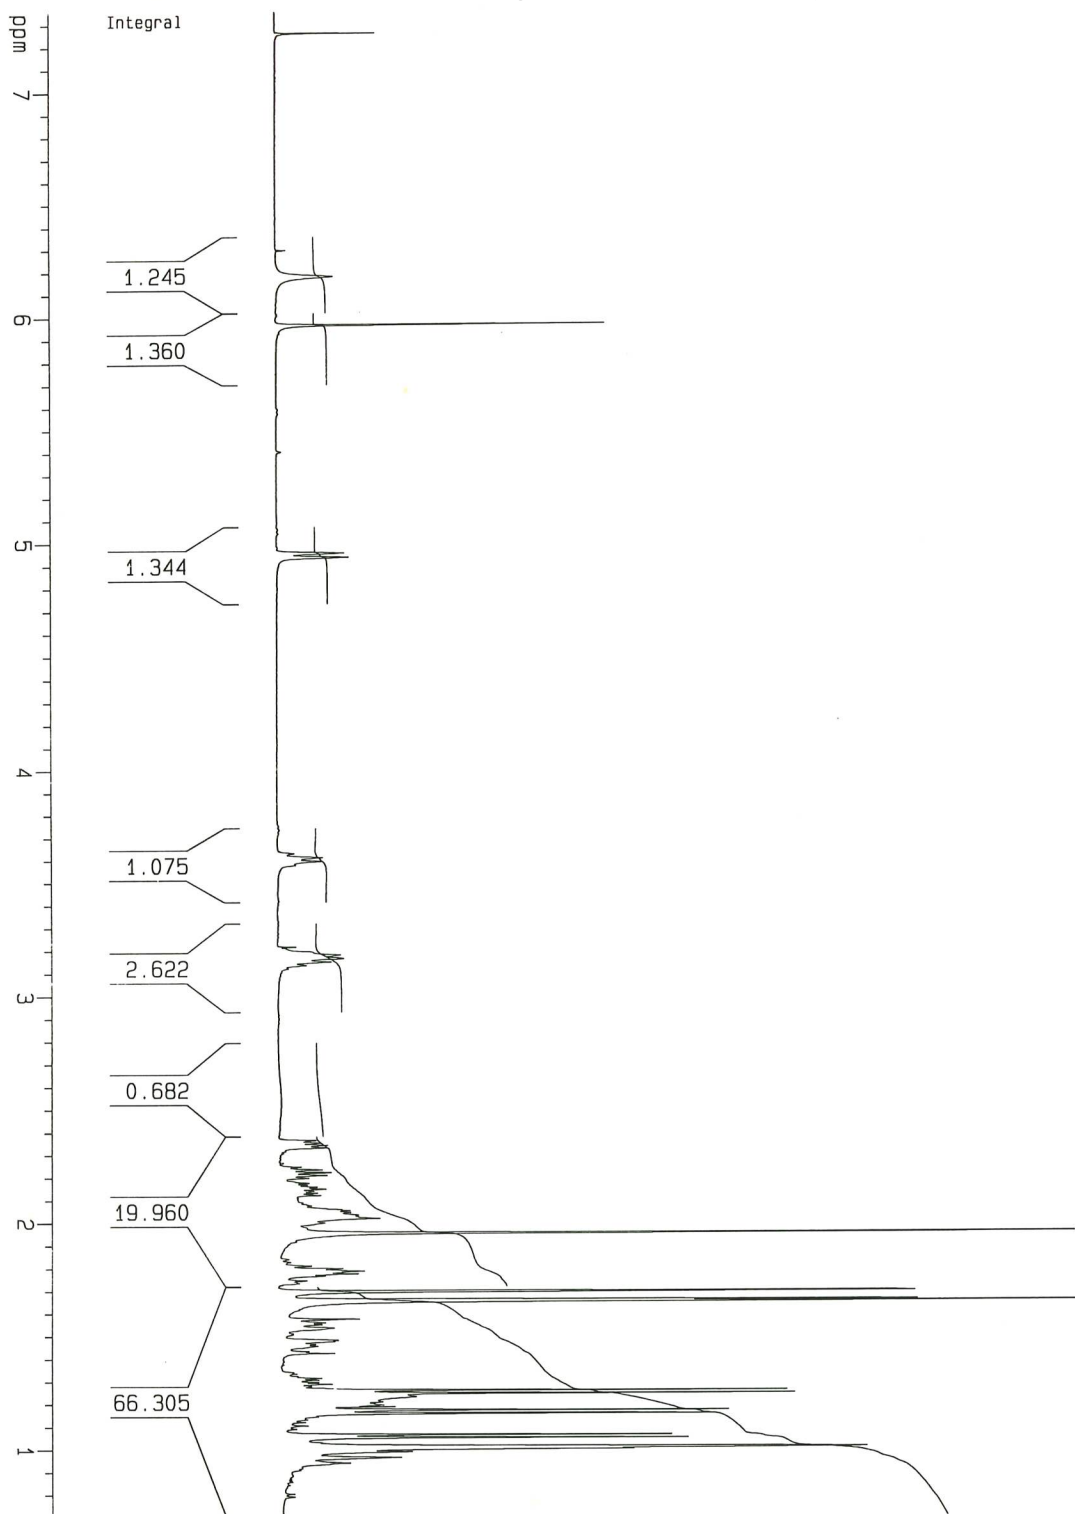

Current Data Parameters

|        |           |
|--------|-----------|
| NAME   | pehdc10k2 |
| EXPNO  | 1         |
| PROCNO | 1         |

F2 - Acquisition Parameters

|         |                 |
|---------|-----------------|
| Date_   | 20020710        |
| Time    | 16:27           |
| INSTRUM | spect           |
| PROBHD  | 5 mm Multinu    |
| PULPROG | zg30            |
| TD      | 32768           |
| SOLVENT | CDCl3           |
| NS      | 32              |
| DS      | 2               |
| SWH     | 7246.377 Hz     |
| FIDRES  | 0.22142 Hz      |
| AQ      | 2.2610421 sec   |
| RG      | 203.2           |
| DW      | 69.000 usec     |
| DE      | 6.00 usec       |
| TE      | 300.0 K         |
| D1      | 1.00000000 sec  |
| P1      | 10.00 usec      |
| SFO1    | 500.1328865 MHz |
| NUC1    | <sup>1</sup> H  |
| PL1     | 0.00 dB         |

F2 - Processing parameters

|     |                 |
|-----|-----------------|
| SI  | 16384           |
| SF  | 500.1300135 MHz |
| WDW | EM              |
| SSB | 0               |
| LB  | 0.30 Hz         |
| GB  | 0               |
| PC  | 1.00            |

1D NMR plot parameters

|       |                 |
|-------|-----------------|
| CX    | 20.00 cm        |
| F1P   | 7.357 ppm       |
| F1    | 3679.48 Hz      |
| F2P   | 0.707 ppm       |
| F2    | 353.72 Hz       |
| PPMCM | 0.33249 ppm/cm  |
| HZCM  | 166.28813 Hz/cm |

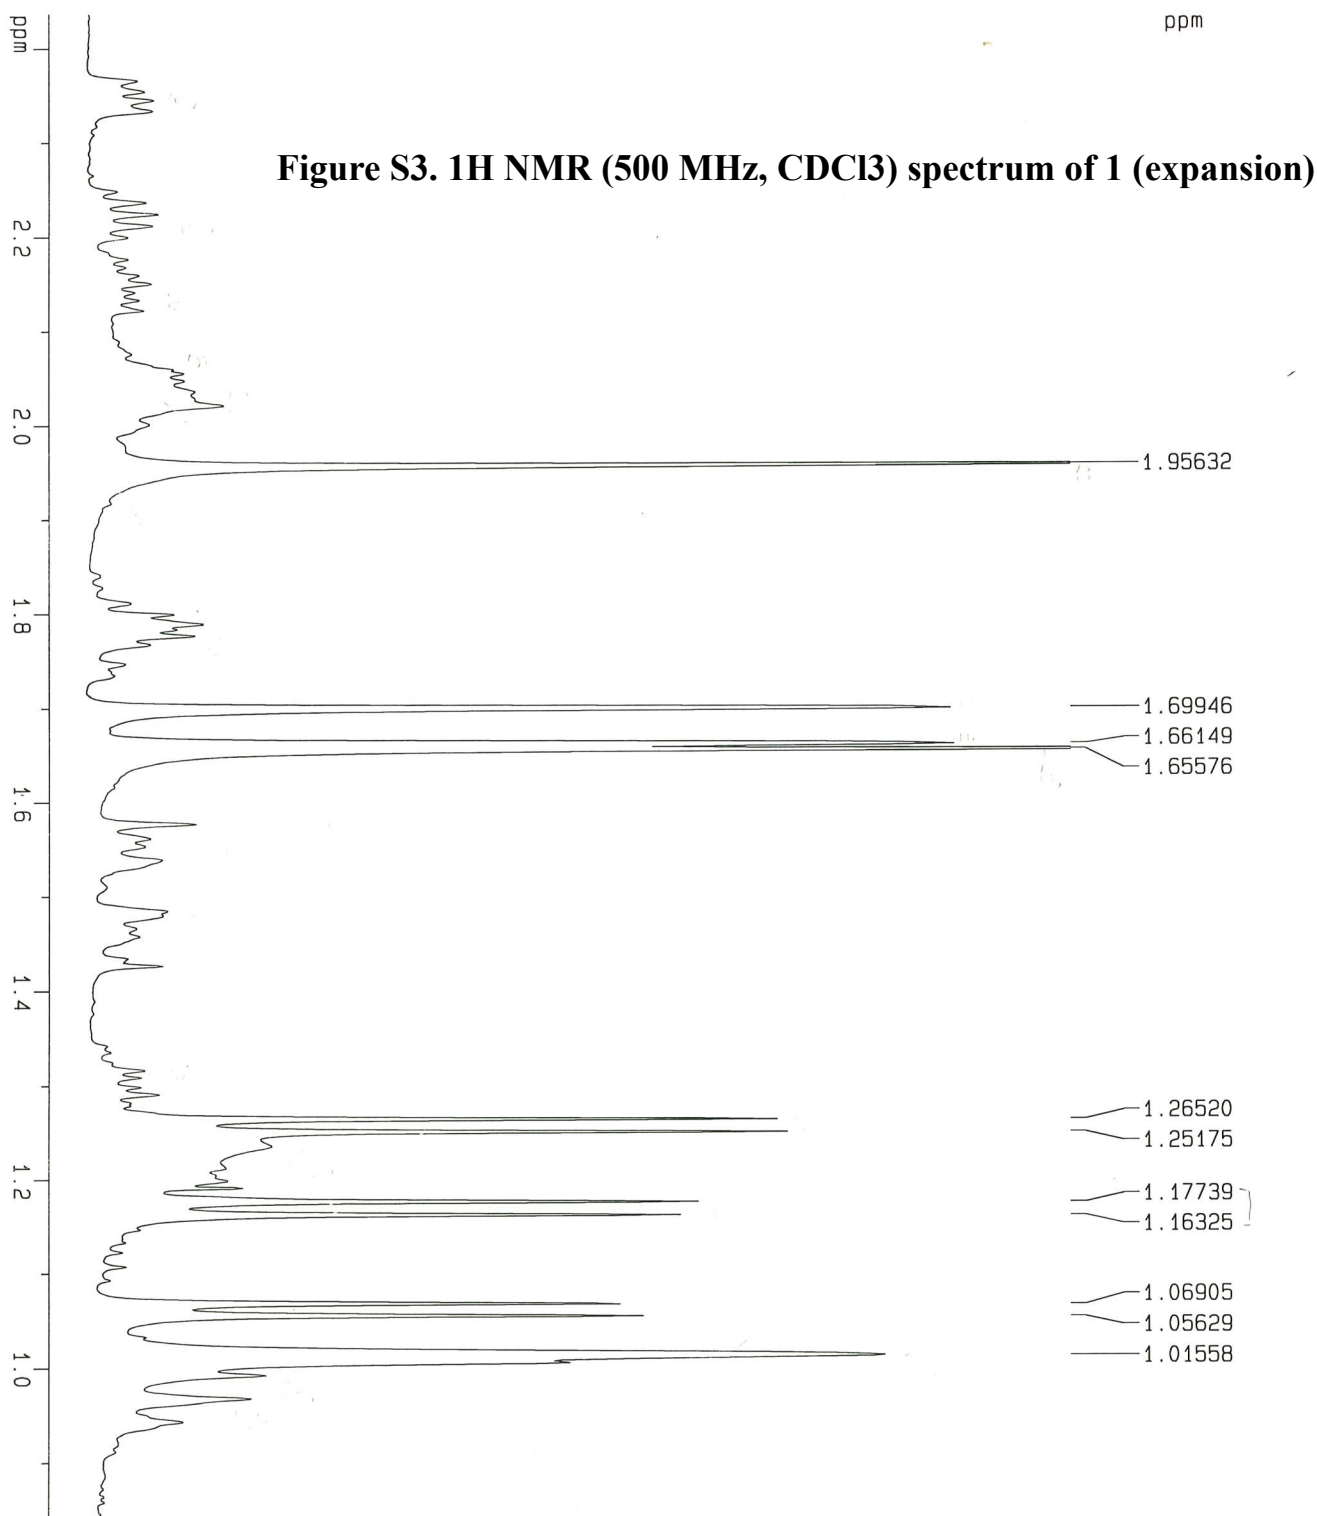

Current Data Parameters

|        |           |
|--------|-----------|
| NAME   | pehdc10k2 |
| EXPNO  | 1         |
| PROCNO | 1         |

F2 - Acquisition Parameters

|         |                 |
|---------|-----------------|
| Date_   | 20020710        |
| Time    | 16.27           |
| INSTRUM | spect           |
| PROBHD  | 5 mm Multinu    |
| PULPROG | zg30            |
| TD      | 32768           |
| SOLVENT | $\text{CDCl}_3$ |
| NS      | 32              |
| DS      | 2               |
| SWH     | 7246.377 Hz     |
| FIDRES  | 0.22142 Hz      |
| AQ      | 2.2610421 sec   |
| RG      | 203.2           |
| DM      | 69.000 usec     |
| DE      | 6.00 usec       |
| TE      | 300.0 K         |
| D1      | 1.00000000 sec  |
| P1      | 10.00 usec      |
| SFO1    | 500.1328885 MHz |
| NUC1    | $^1\text{H}$    |
| PL1     | 0.00 dB         |

F2 - Processing parameters

|     |                 |
|-----|-----------------|
| SI  | 16384           |
| SF  | 500.1300135 MHz |
| WDW | EM              |
| SSB | 0               |
| LB  | 0.30 Hz         |
| GB  | 0               |
| PC  | 500.00          |

1D NMR plot parameters

|       |                |
|-------|----------------|
| CX    | 20.00 cm       |
| F1P   | 2.437 ppm      |
| F1    | 1218.89 Hz     |
| F2P   | 0.839 ppm      |
| F2    | 419.66 Hz      |
| PPMCM | 0.07990 ppm/cm |
| HZCM  | 39.96180 Hz/cm |

Figure S4. <sup>13</sup>C (125 MHz, CDCl<sub>3</sub>) spectrum of 1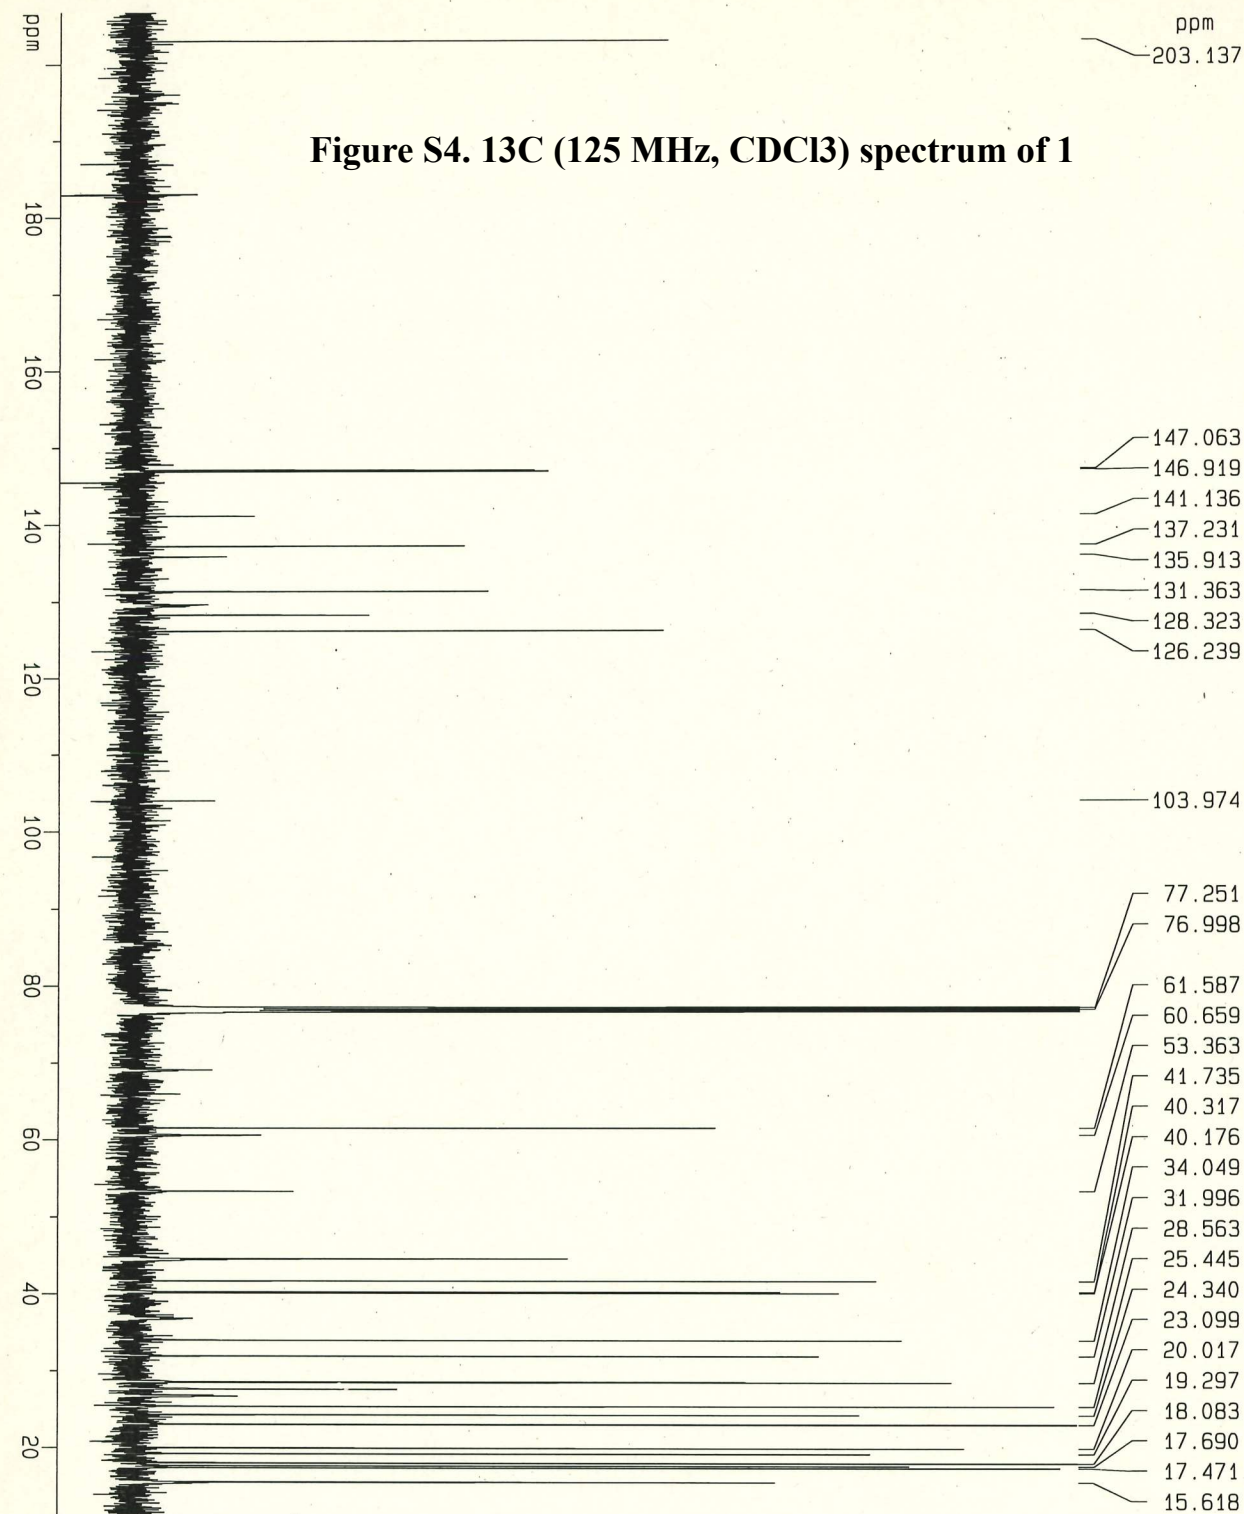

Pend-c10 k2

Current Data Parameters

| NAME   | pendc10k2 |
|--------|-----------|
| EXPNO  | 2         |
| PROCNO | 1         |

F2 - Acquisition Parameters

| Date_   | 20020710        |
|---------|-----------------|
| Time    | 19.16           |
| INSTRUM | spect           |
| PROBHD  | 5 mm Multinu    |
| PULPROG | zgpg30          |
| TD      | 65536           |
| SOLVENT | CDCl3           |
| NS      | 4703            |
| DS      | 2               |
| SMH     | 30303.031 Hz    |
| FIDRES  | 0.462388 Hz     |
| AG      | 1.0813940 sec   |
| RG      | 8192            |
| DW      | 16.500 usec     |
| DE      | 6.00 usec       |
| TE      | 300.0 K         |
| D12     | 0.00002000 sec  |
| PL13    | 22.00 dB        |
| D1      | 1.00000000 sec  |
| CPDPRG2 | waltz16         |
| PCPD2   | 102.00 usec     |
| SFO2    | 500.132005 MHz  |
| NUC2    | <sup>1</sup> H  |
| PL2     | 0.00 dB         |
| PL12    | 22.00 dB        |
| P1      | 10.00 usec      |
| SFO1    | 125.770995 MHz  |
| NUC1    | <sup>13</sup> C |
| PL1     | 2.00 dB         |
| D11     | 0.03000000 sec  |

F2 - Processing parameters

| SI  | 32768           |
|-----|-----------------|
| SF  | 125.7577906 MHz |
| WDW | EM              |
| SSB | 0               |
| LB  | 1.00 Hz         |
| GB  | 0               |
| PC  | 2.00            |

10 NMR plot parameters

| CX    | 20.00 cm         |
|-------|------------------|
| F1P   | 206.828 ppm      |
| F1    | 26010.20 Hz      |
| F2P   | 11.270 ppm       |
| F2    | 1417.25 Hz       |
| PPMCM | 9.77790 ppm/cm   |
| HZCM  | 1229.64709 Hz/cm |



Figure S5.  $^{13}\text{C}$  (125 MHz,  $\text{CDCl}_3$ ) spectrum of 1 (expansion)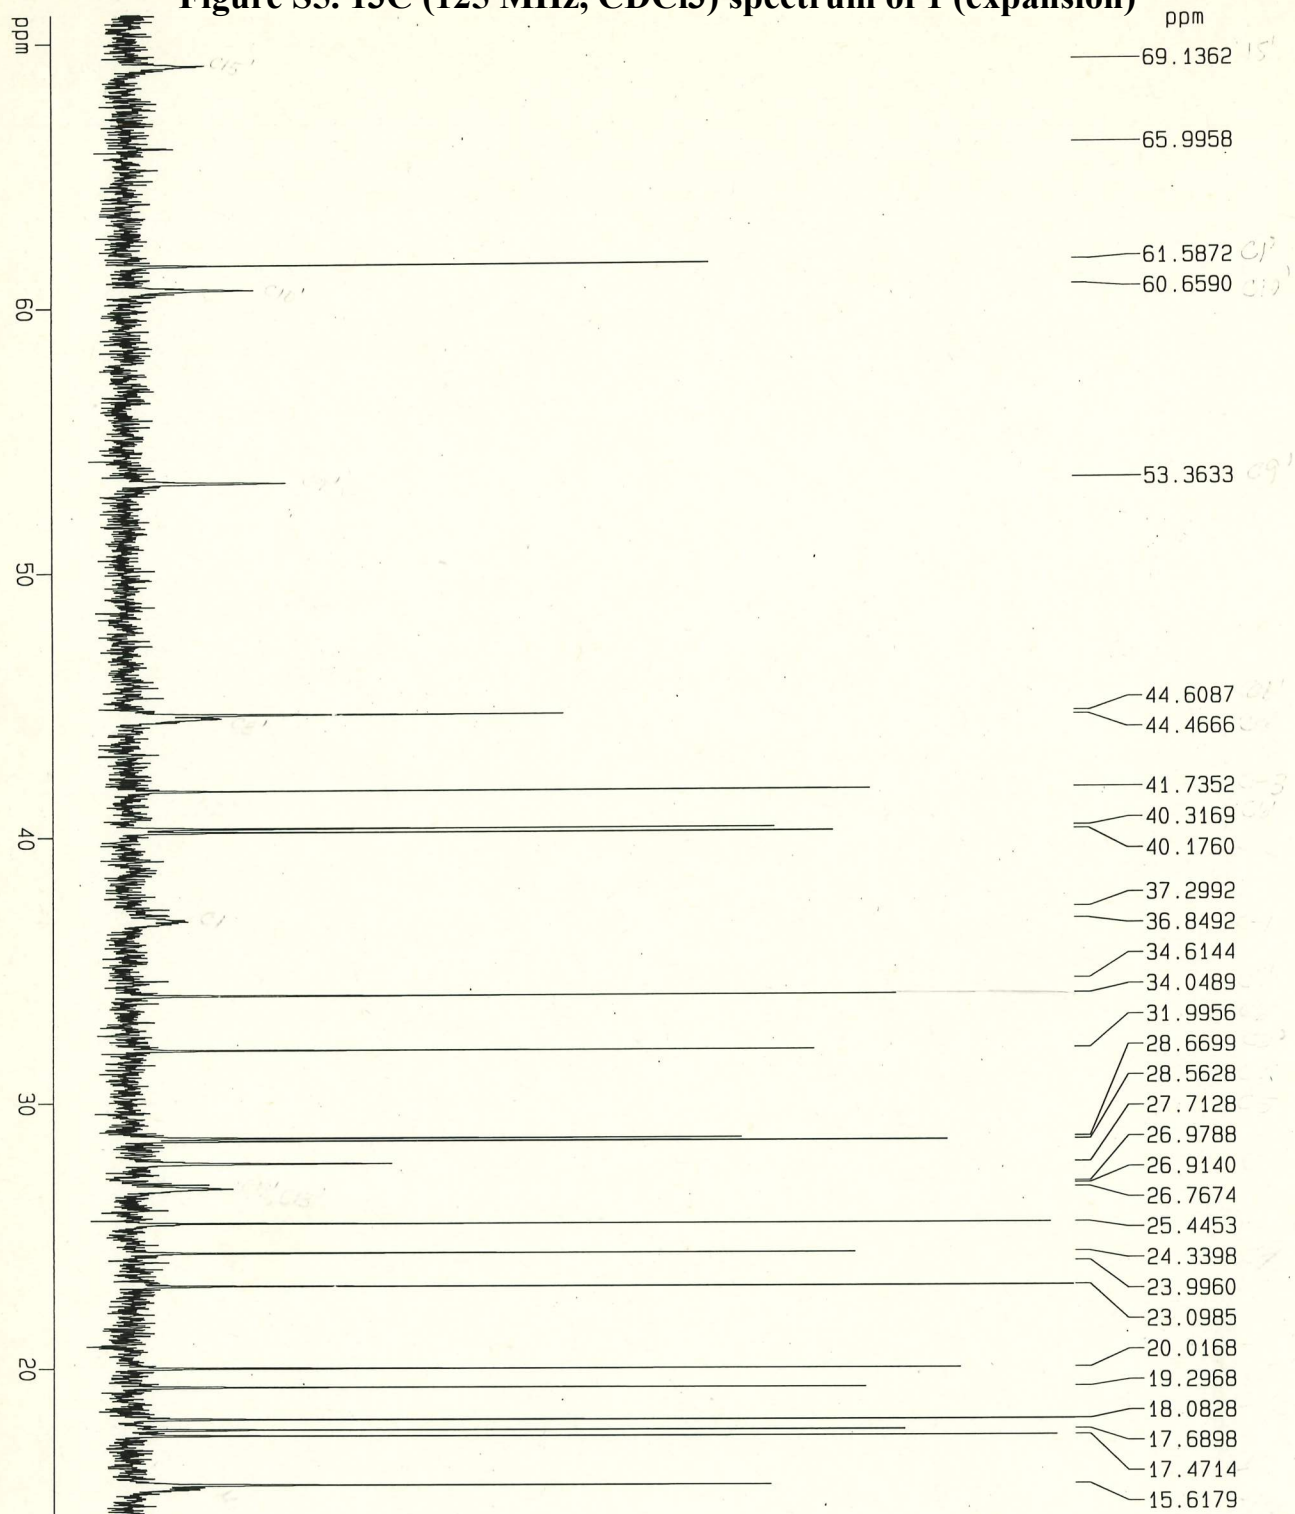

Pend-c10 k2

Current Data Parameters

|        |           |
|--------|-----------|
| NAME   | pendc10k2 |
| EXPNO  | 2         |
| PROCNO | 1         |

F2 - Acquisition Parameters

|         |                 |
|---------|-----------------|
| Date_   | 20020710        |
| Time    | 19.16           |
| INSTRUM | spect           |
| PROBHD  | 5 mm Multinu    |
| PULPROG | zgpg30          |
| TD      | 65536           |
| SOLVENT | $\text{CDCl}_3$ |
| NS      | 4703            |
| DS      | 2               |
| SWH     | 30303.031 Hz    |
| FIDRES  | 0.462388 Hz     |
| AQ      | 1.0813940 sec   |
| RG      | 8192            |
| DM      | 16.500 usec     |
| DE      | 6.00 usec       |
| TE      | 300.0 K         |
| D12     | 0.00002000 sec  |
| PL13    | 22.00 dB        |
| D1      | 1.00000000 sec  |
| CPDPRG2 | waltz16         |
| PCPD2   | 102.00 usec     |
| SFO2    | 500.132005 MHz  |
| NUC2    | $^1\text{H}$    |
| PL2     | 0.00 dB         |
| PL12    | 22.00 dB        |
| P1      | 10.00 usec      |
| SFO1    | 125.7709955 MHz |
| NUC1    | $^{13}\text{C}$ |
| PL1     | 2.00 dB         |
| D11     | 0.03000000 sec  |

F2 - Processing parameters

|     |                 |
|-----|-----------------|
| SI  | 32768           |
| SF  | 125.7577906 MHz |
| WDW | EM              |
| SSB | 0               |
| LB  | 1.00 Hz         |
| GB  | 0               |
| PC  | 1.00            |

1D NMR plot parameters

|       |                 |
|-------|-----------------|
| CX    | 20.00 cm        |
| F1P   | 71.105 ppm      |
| F1    | 8941.96 Hz      |
| F2P   | 14.371 ppm      |
| F2    | 1807.25 Hz      |
| PPMCK | 2.83669 ppm/cm  |
| HZCM  | 356.73535 Hz/cm |

Pend-c10 k2  
COSY 45

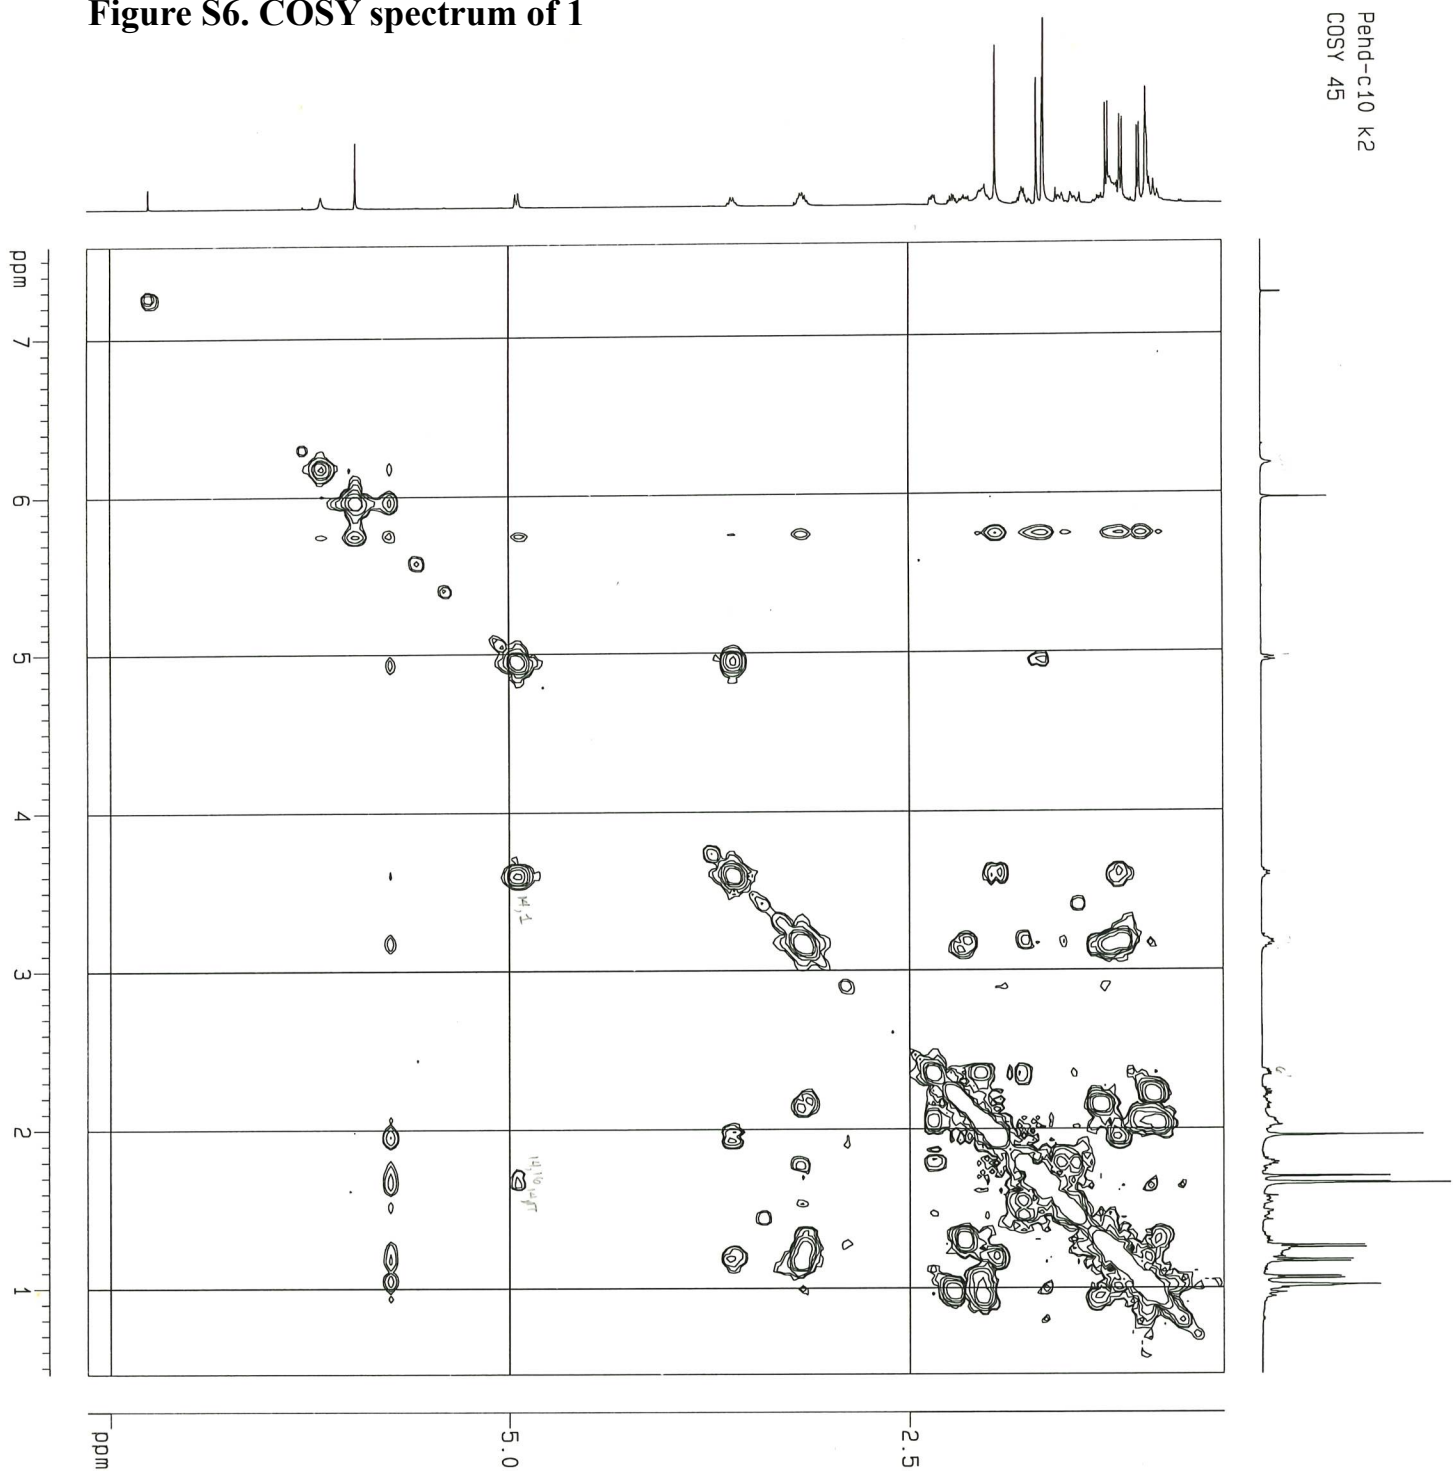

Current Data Parameters

|        |            |
|--------|------------|
| NAME   | pend-c10k2 |
| EXPNO  | 5          |
| PROCNO | 1          |

F2 - Acquisition Parameters

|         |                 |
|---------|-----------------|
| Date_   | 20020710        |
| Time    | 16.31           |
| INSTRUM | Spect           |
| PROBHD  | 5 mm MultiNU    |
| PULPROG | cosy45          |
| TD      | 1024            |
| SOLVENT | CDCl3           |
| NS      | 8               |
| DS      | 16              |
| SMH     | 7246.377 Hz     |
| FIDRES  | 7.076540 Hz     |
| AQ      | 0.0707060 sec   |
| RG      | 101.6           |
| DW      | 69.000 usec     |
| DE      | 6.00 usec       |
| TE      | 300.0 K         |
| D1      | -1.00000000 sec |
| P1      | 10.00 usec      |
| SFO1    | 500.132885 MHz  |
| NUC1    | 1H              |
| PL1     | 0.00 dB         |
| DO      | 0.00000300 sec  |
| INO     | 0.00013800 sec  |

F1 - Acquisition Parameters

|        |              |
|--------|--------------|
| ND0    | 1            |
| TD     | 256          |
| SFO1   | 500.1328 MHz |
| FIDRES | 28.306160 Hz |
| SM     | 14.489 ppm   |

F2 - Processing parameters

|     |                 |
|-----|-----------------|
| SI  | 512             |
| SF  | 500.1300135 MHz |
| WDW | SINE            |
| SSB | 0               |
| LB  | 0.00 Hz         |
| GB  | 0               |
| PC  | 1.00            |

F1 - Processing parameters

|     |                 |
|-----|-----------------|
| SI  | 512             |
| MC2 | GF              |
| SF  | 500.1300135 MHz |
| WDW | SINE            |
| SSB | 0               |
| LB  | 0.00 Hz         |
| GB  | 0               |

2D NMR plot parameters

|        |                 |
|--------|-----------------|
| CX2    | 15.00 cm        |
| CX1    | 15.00 cm        |
| F2PL0  | 7.588 ppm       |
| F2L0   | 3794.99 Hz      |
| F2PH1  | 0.457 ppm       |
| F2H1   | 228.41 Hz       |
| F1PL0  | 7.645 ppm       |
| F1L0   | 3823.29 Hz      |
| F1PH1  | 0.542 ppm       |
| F1H1   | 270.87 Hz       |
| F2PMCM | 0.47542 ppm/cm  |
| F2HZCM | 237.77173 Hz/cm |
| F1PMCM | 0.47353 ppm/cm  |
| F1HZCM | 236.82820 Hz/cm |

Figure S6. COSY spectrum of 1

PEHD-C10 K2  
HMQC

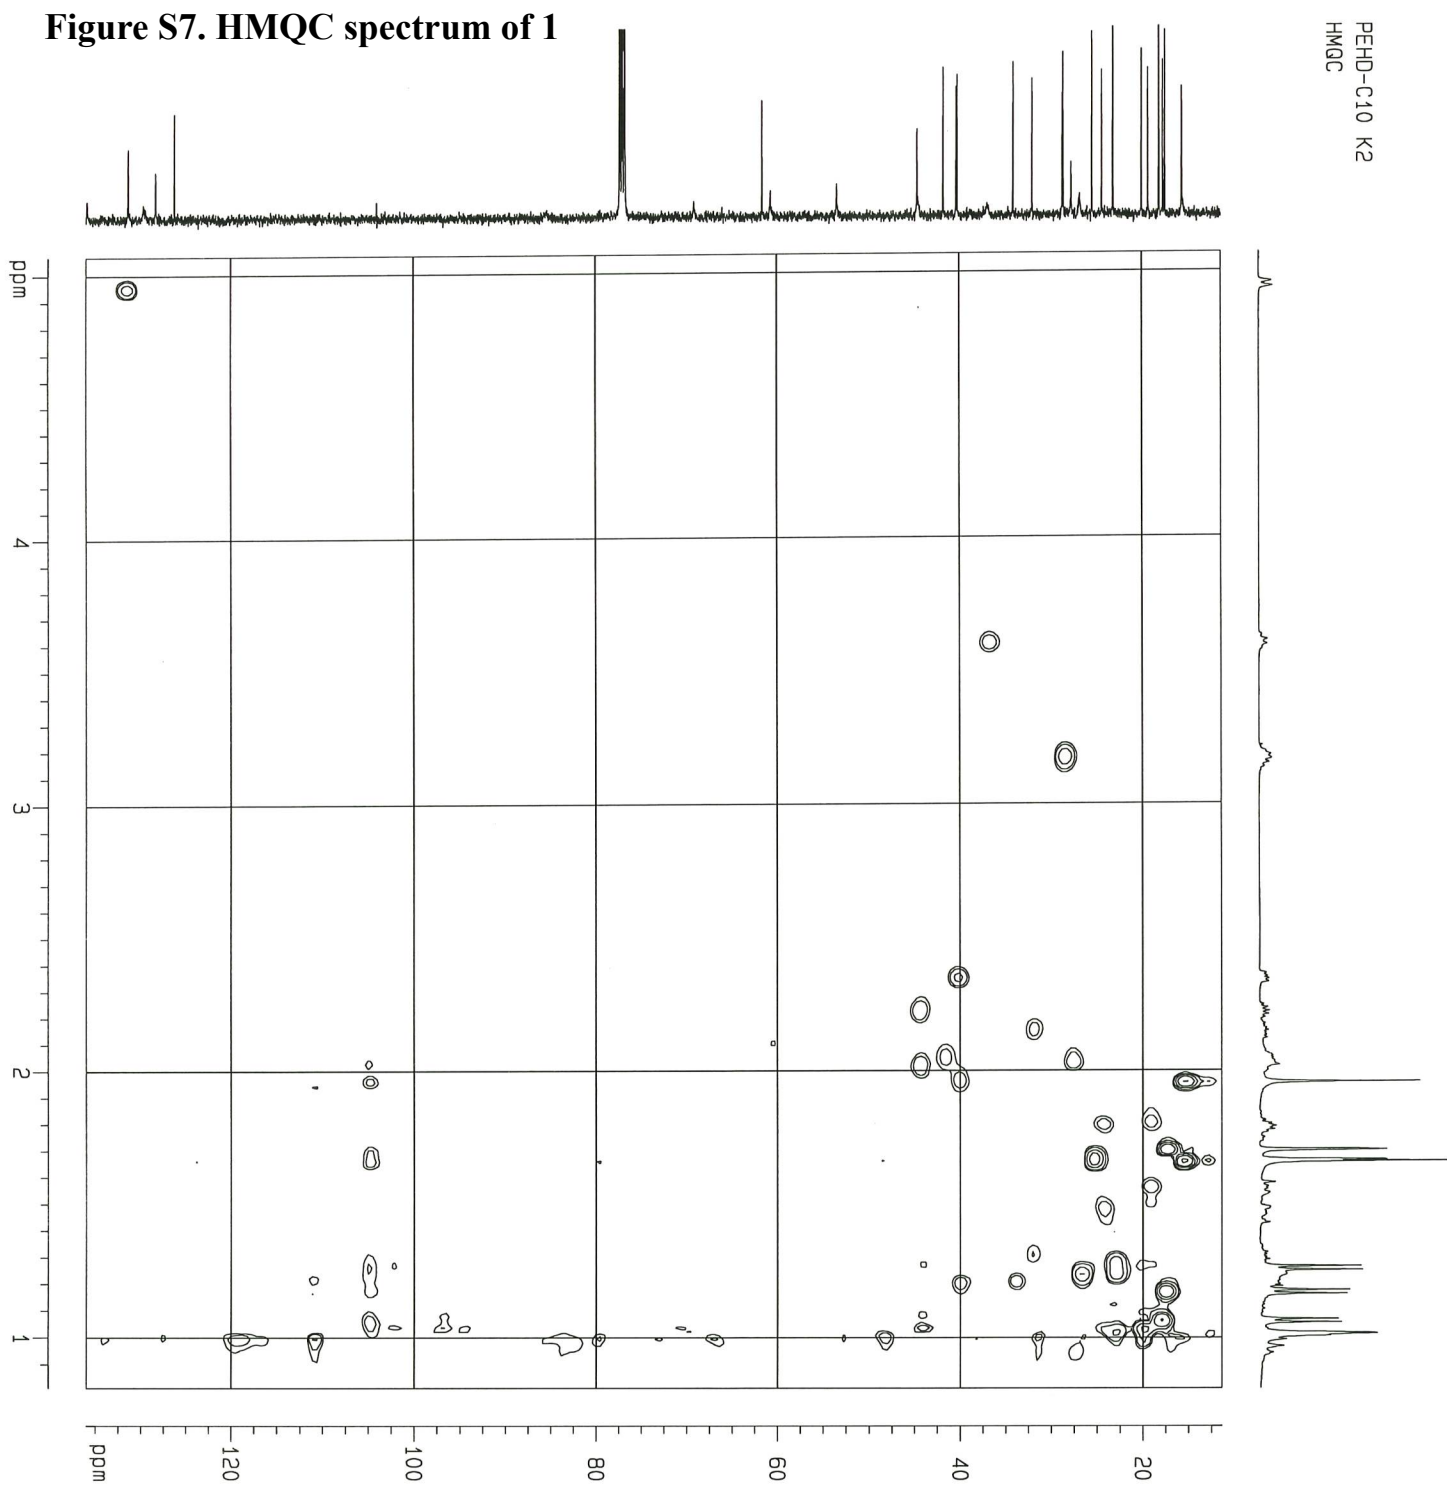

Current Data Parameters

| NAME       | EXPNO | PROCNO |
|------------|-------|--------|
| pehd-c10k2 | 15    | 1      |

F2 - Acquisition Parameters

| Date_    | Time  |
|----------|-------|
| 20020711 | 16.40 |

INSTRUM spect  
PROBHD 5 mm Multinu  
PULPROG invtdp  
TD 1024  
SOLVENT CDCl3  
NS 8  
DS 32  
SMH 7246.377 Hz  
FIDRES 7.075540 Hz  
AQ 0.0707060 sec  
RG 574.7  
DM 69.000 usec  
DE 5.00 usec  
TE 300.0 K  
D1 1.2500000 sec  
P1 10.50 usec  
SFO1 500.132885 MHz  
NUC1 1H  
P11 0.00 dB  
D2 0.0034600 sec  
P12 2.00 dB  
P2 21.00 usec  
P4 17.00 usec  
SFO2 125.770985 MHz  
NUC2 13C  
D7 0.4000001 sec  
P3 8.50 usec  
D0 0.0000300 sec  
P112 20.00 dB  
COPR02 9999  
PCPR02 66.00 usec  
IN0 0.00000825 sec

F1 - Acquisition Parameters

| NO | TD  |
|----|-----|
| 4  | 256 |

SFO1 125.771 MHz  
FIDRES 118.371216 Hz  
SM 240.938 ppm

F2 - Processing parameters

| SI   | SF             |
|------|----------------|
| 1024 | 500.130135 MHz |

WDW 0SINE  
SSB 2  
LB 0.00 Hz  
GB 0  
PC 0.00

F1 - Processing parameters

| SI  | MC2             |
|-----|-----------------|
| 142 | 125.7577908 MHz |

WDW SINE  
SSB 2  
LB 0.00 Hz  
GB 0

2D NMR plot parameters

| CK2      | CK1      |
|----------|----------|
| 15.00 cm | 15.00 cm |

F2H0 5.069 ppm  
F2L0 2555.36 Hz  
F2H1 0.810 ppm  
F2L1 465.32 Hz  
F2H0 156.065 ppm  
F2L0 17111.19 Hz  
F2H1 11.347 ppm  
F2H0 0.26593 ppm/cm  
F2L0 142.00256 Hz/cm  
F2H0 8.31449 ppm/cm  
F2L0 1045.61230 Hz/cm

PEH 2.11 F2  
HMBC

Figure S8. HMBC spectrum of 1

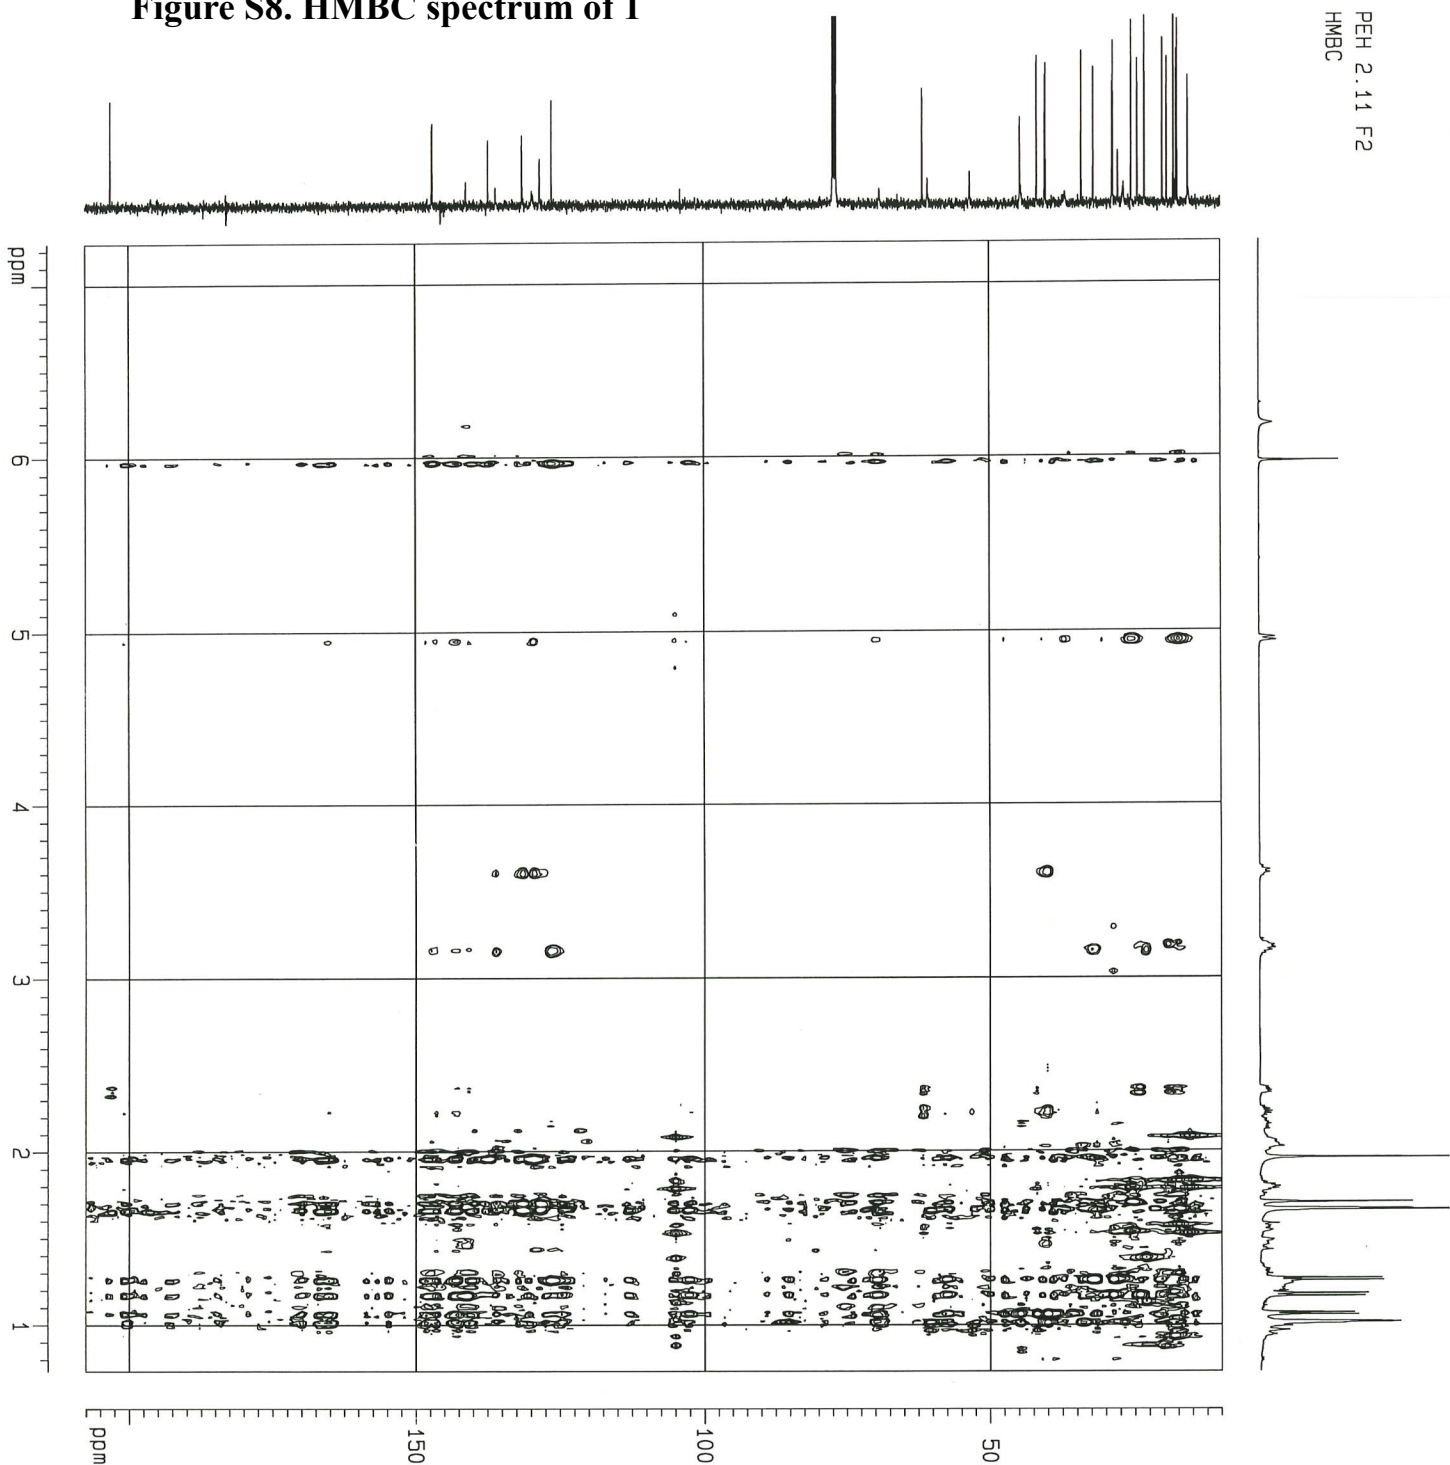

Current Data Parameters  
NAME peridolK2  
EXPNO 10  
PROCNO 1

F2 - Acquisition Parameters  
Date\_ 20020710  
Time 22:46  
INSTRUM spect  
PROBHD 5 mm MUlti  
PULPROG invalid  
TD 4096  
SOLVENT CDCl3  
NS 72  
DS 32  
SMH 7246.377 Hz  
FIDRES 1.769135 Hz  
AQ 0.2826740 sec  
RG 256  
DM 69.000 usec  
DE 6.00 usec  
TE 300.0 K  
D1 1.5000000 sec  
P1 10.00 usec  
SFO1 500.1328865 MHz  
NUC1 1H  
PL1 0.00 dB  
D2 0.0030000 sec  
P2 0.00 usec  
SFO2 125.7709353 MHz  
NUC2 13C  
PL2 2.00 dB  
D6 0.0500000 sec  
D0 0.0000300 sec  
P2 20.00 usec  
INO 0.00001650 sec

F1 - Acquisition Parameters  
N00 2  
TD 256  
SFO1 125.771 MHz  
FIDRES 118.371216 Hz  
SM 240.938 ppm

F2 - Processing parameters  
SI 2048  
SF 500.1300135 MHz  
WDW 0SINE  
SSB 4  
LB 0.00 Hz  
GB 0  
PC 1.00

F1 - Processing parameters  
SI 256  
MC2 0F  
SF 125.7577906 MHz  
WDW SINE  
SSB 2  
LB 0.00 Hz  
GB 0

2D NMR plot parameters  
CX2 15.00 cm  
CX1 15.00 cm  
F2PLO 7.241 ppm  
F2LO 3621.61 Hz  
F2PH 0.733 ppm  
F2H1 366.40 Hz  
F1PLO 207.601 ppm  
F1LO 26107.40 Hz  
F1PH 9.935 ppm  
F1H1 1249.45 Hz  
F2PPOCH 0.43391 ppm/cm  
F2H2CM 217.01389 Hz/cm  
F1PPOCH 13.17769 ppm/cm  
F1H2CM 1657.19690 Hz/cm



PEH 2.11 F2  
HMBC

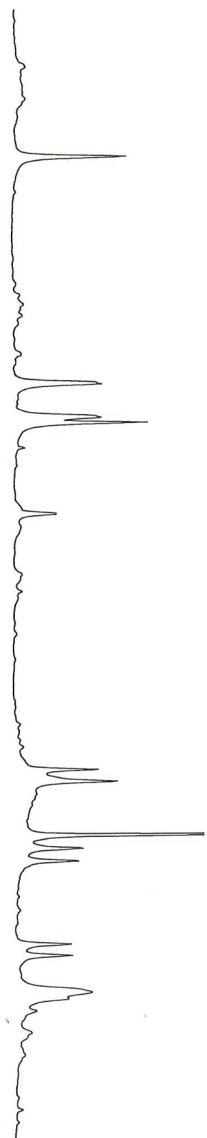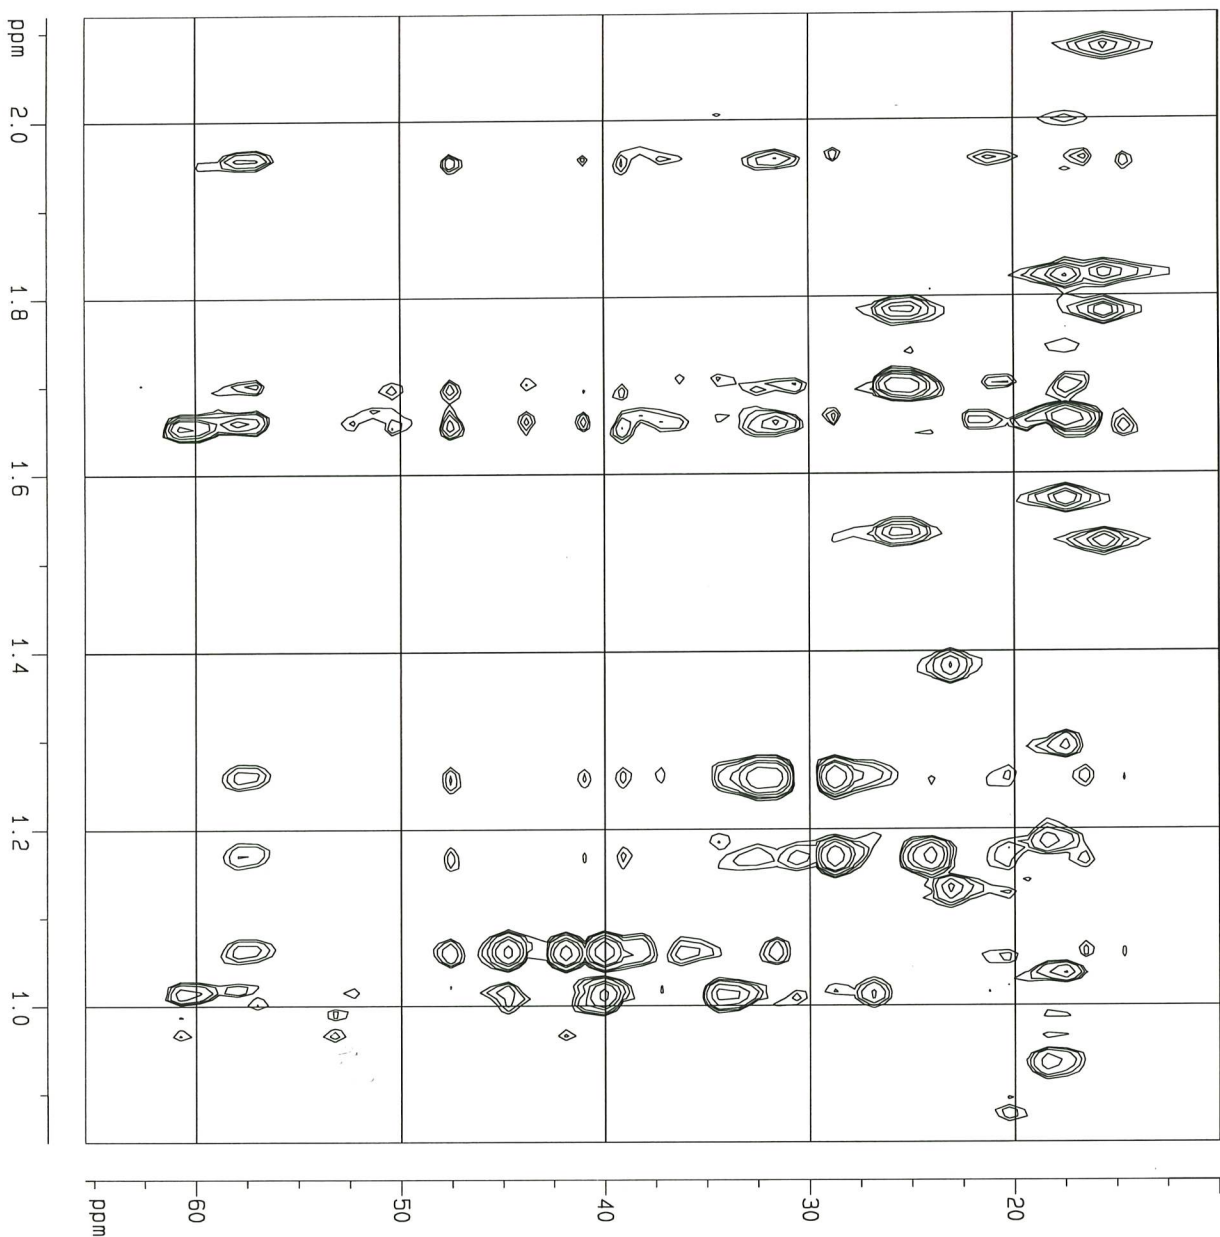

Current Data Parameters  
NAME peh2c10k2  
EXPNO 10  
PROCNO 1

F2 - Acquisition Parameters  
Date\_ 20020710  
Time 22:46  
INSTRUM spect  
PROBHD 5 mm Multino  
PULPROG invalid  
TD 4096  
SOLVENT CDCl3  
NS 72  
DS 32  
SHH 7246.377 Hz  
FIDRES 1.769135 Hz  
AQ 0.2826740 sec  
RG 256  
DM 69.000 usec  
DE 6.00 usec  
TE 300.0 K  
D1 1.5000000 sec  
P1 10.00 usec  
SF01 500.132885 MHz  
NUC1 1H  
PL1 0.00 dB  
D2 0.0030000 sec  
P3 10.00 usec  
SF02 125.770955 MHz  
NUC2 13C  
PL2 2.00 dB  
D6 0.0500000 sec  
D0 0.0000300 sec  
P2 20.00 usec  
INO 0.00001650 sec

F1 - Acquisition Parameters  
NO 2  
TD 256  
SF01 125.771 MHz  
FIDRES 118.371216 Hz  
SM 240.938 ppm

F2 - Processing parameters  
SI 2048  
SF 500.130135 MHz  
WDW GSSINE  
SSB 4  
LB 0.00 Hz  
GB 0  
PC 1.00

F1 - Processing parameters  
SI 256  
MC2 OF  
SF 125.7577906 MHz  
WDW SINE  
SSB 2  
LB 0.00 Hz  
GB 0

2D NMR plot parameters  
CX2 15.00 cm  
CX1 15.00 cm  
F2FLO 2.119 ppm  
F2LO 1059.90 Hz  
F2PHI 0.846 ppm  
F2H1 423.01 Hz  
F1FLO 65.470 ppm  
F1LO 8233.35 Hz  
F1PHI 9.935 ppm  
F1H1 1249.45 Hz  
F2PHICM 0.08460 ppm/cm  
F2H2CM 42.45924 Hz/cm  
F1PHICM 3.70230 ppm/cm  
F1H2CM 465.59344 Hz/cm

Figure S9. HMBC spectrum of 1 (expansion)

PEH 2.11 F2  
HMBC

Figure S10. HMBC spectrum of 1 (expansion)

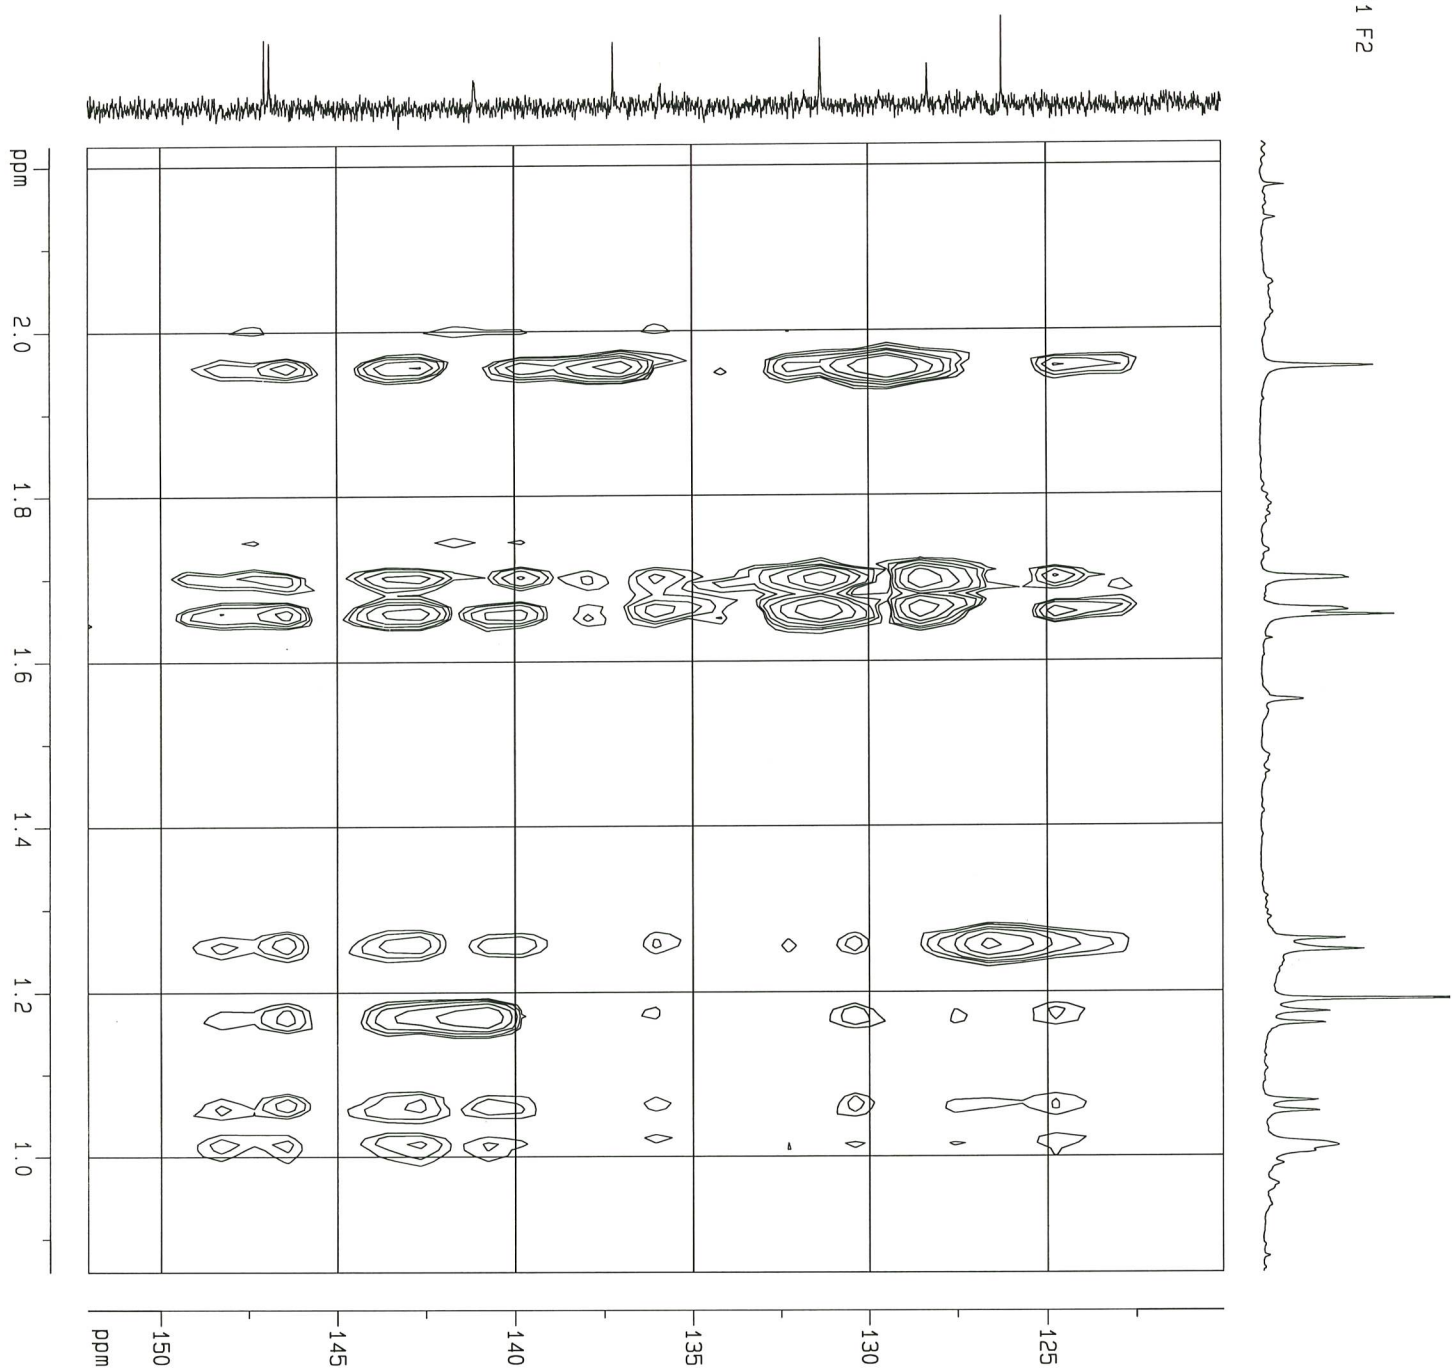

Current Data Parameters  
NAME percd10k2  
EXPNO 10  
PROCNO 1

F2 - Acquisition Parameters  
Date\_ 20020710  
Time 22.46  
INSTRUM spect  
PROBHD 5 mm Multino  
PULPROG invalidprog  
TD 4096  
SOLVENT CDCl3  
NS 72  
DS 32  
SHH 7246.377 Hz  
FIDRES 1.769135 Hz  
AQ 0.2826740 sec  
RG 256  
DM 69.000 usec  
DE 6.00 usec  
TE 300.0 K  
D1 1.5000000 sec  
P1 10.00 usec  
SFO1 500.1328885 MHz  
NUC1 1H  
PL1 0.00 dB  
D2 0.0030000 sec  
P3 10.00 usec  
SFO2 125.7709553 MHz  
NUC2 13C  
PL2 2.00 dB  
D6 0.0500000 sec  
D0 0.0000300 sec  
P2 20.00 usec  
INO 0.00001650 sec

F1 - Acquisition Parameters  
NDO 2  
TD 256  
SFO1 125.771 MHz  
FIDRES 118.371216 Hz  
SM 240.938 ppm

F2 - Processing parameters  
SI 2048  
SF 500.130135 MHz  
WDW 63LINE  
SSB 4  
LB 0.00 Hz  
GB 0  
PC 1.00

F1 - Processing parameters  
SI 256  
MC2 OF  
SF 125.757906 MHz  
WDW SINE  
SSB 2  
LB 0.00 Hz  
GB 0

2D NMR plot parameters  
CX2 15.00 cm  
CY1 15.00 cm  
F2PL0 2.225 ppm  
F2PL1 1112.58 Hz  
F2PH1 0.660 ppm  
F2PL0 430.09 Hz  
F2PL1 152.065 ppm  
F2LO 19123.50 Hz  
F2PH1 120.063 ppm  
F2HI 15098.88 Hz  
F2PRMCM 0.09103 ppm/cm  
F2HZCM 45.52574 Hz/cm  
F1PRMCM 2.13353 ppm/cm  
F1HZCM 268.30811 Hz/cm

Figure S11. NOESY spectrum of 1

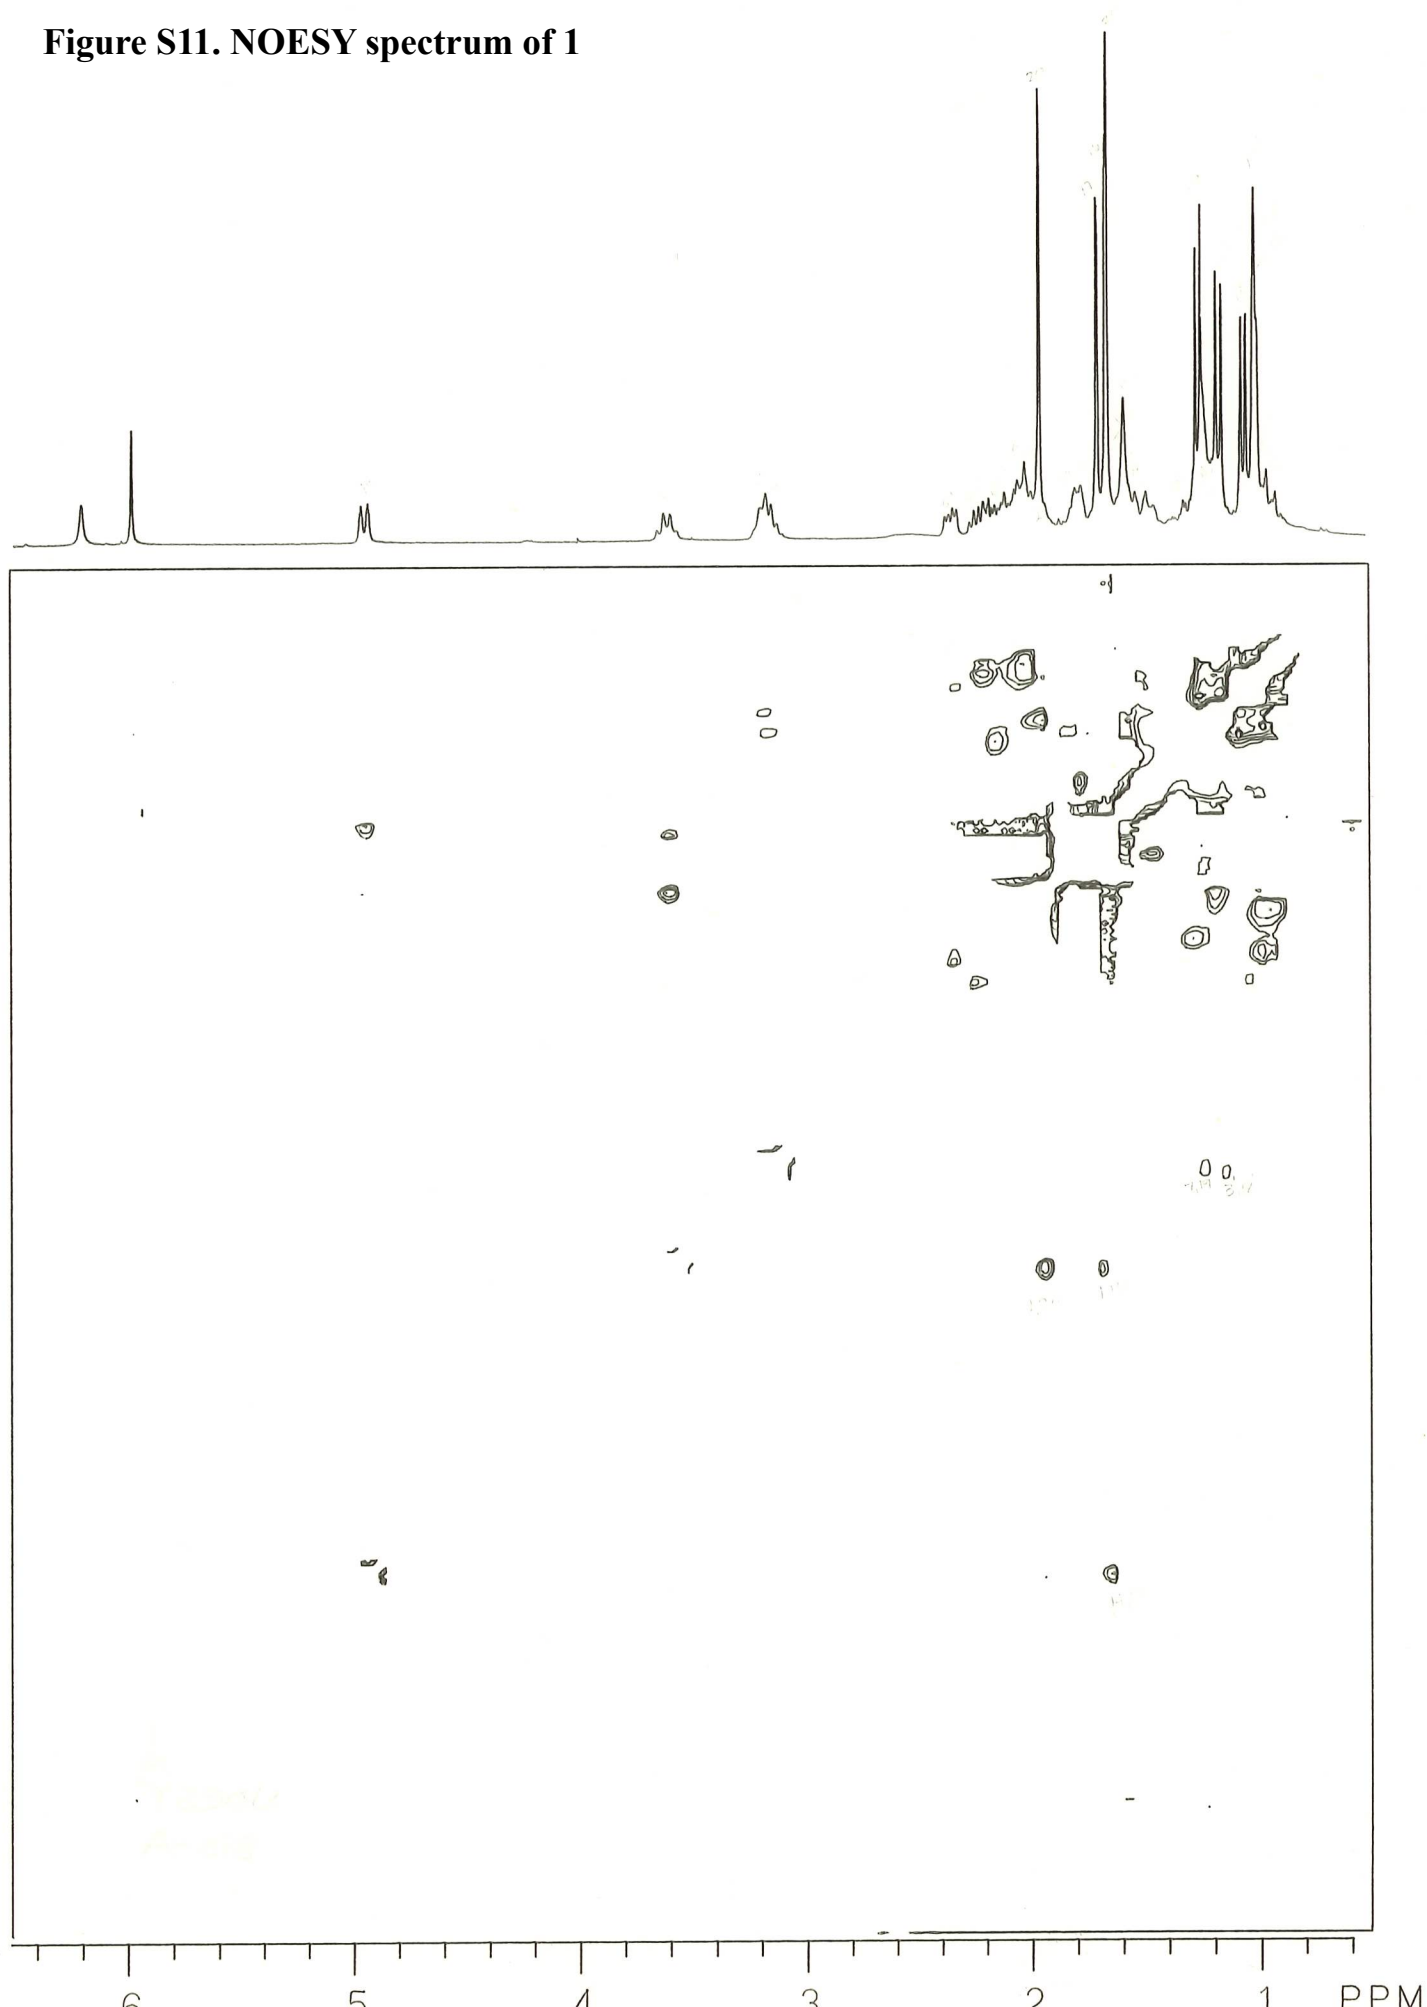

Figure S12. IR spectrum of 1

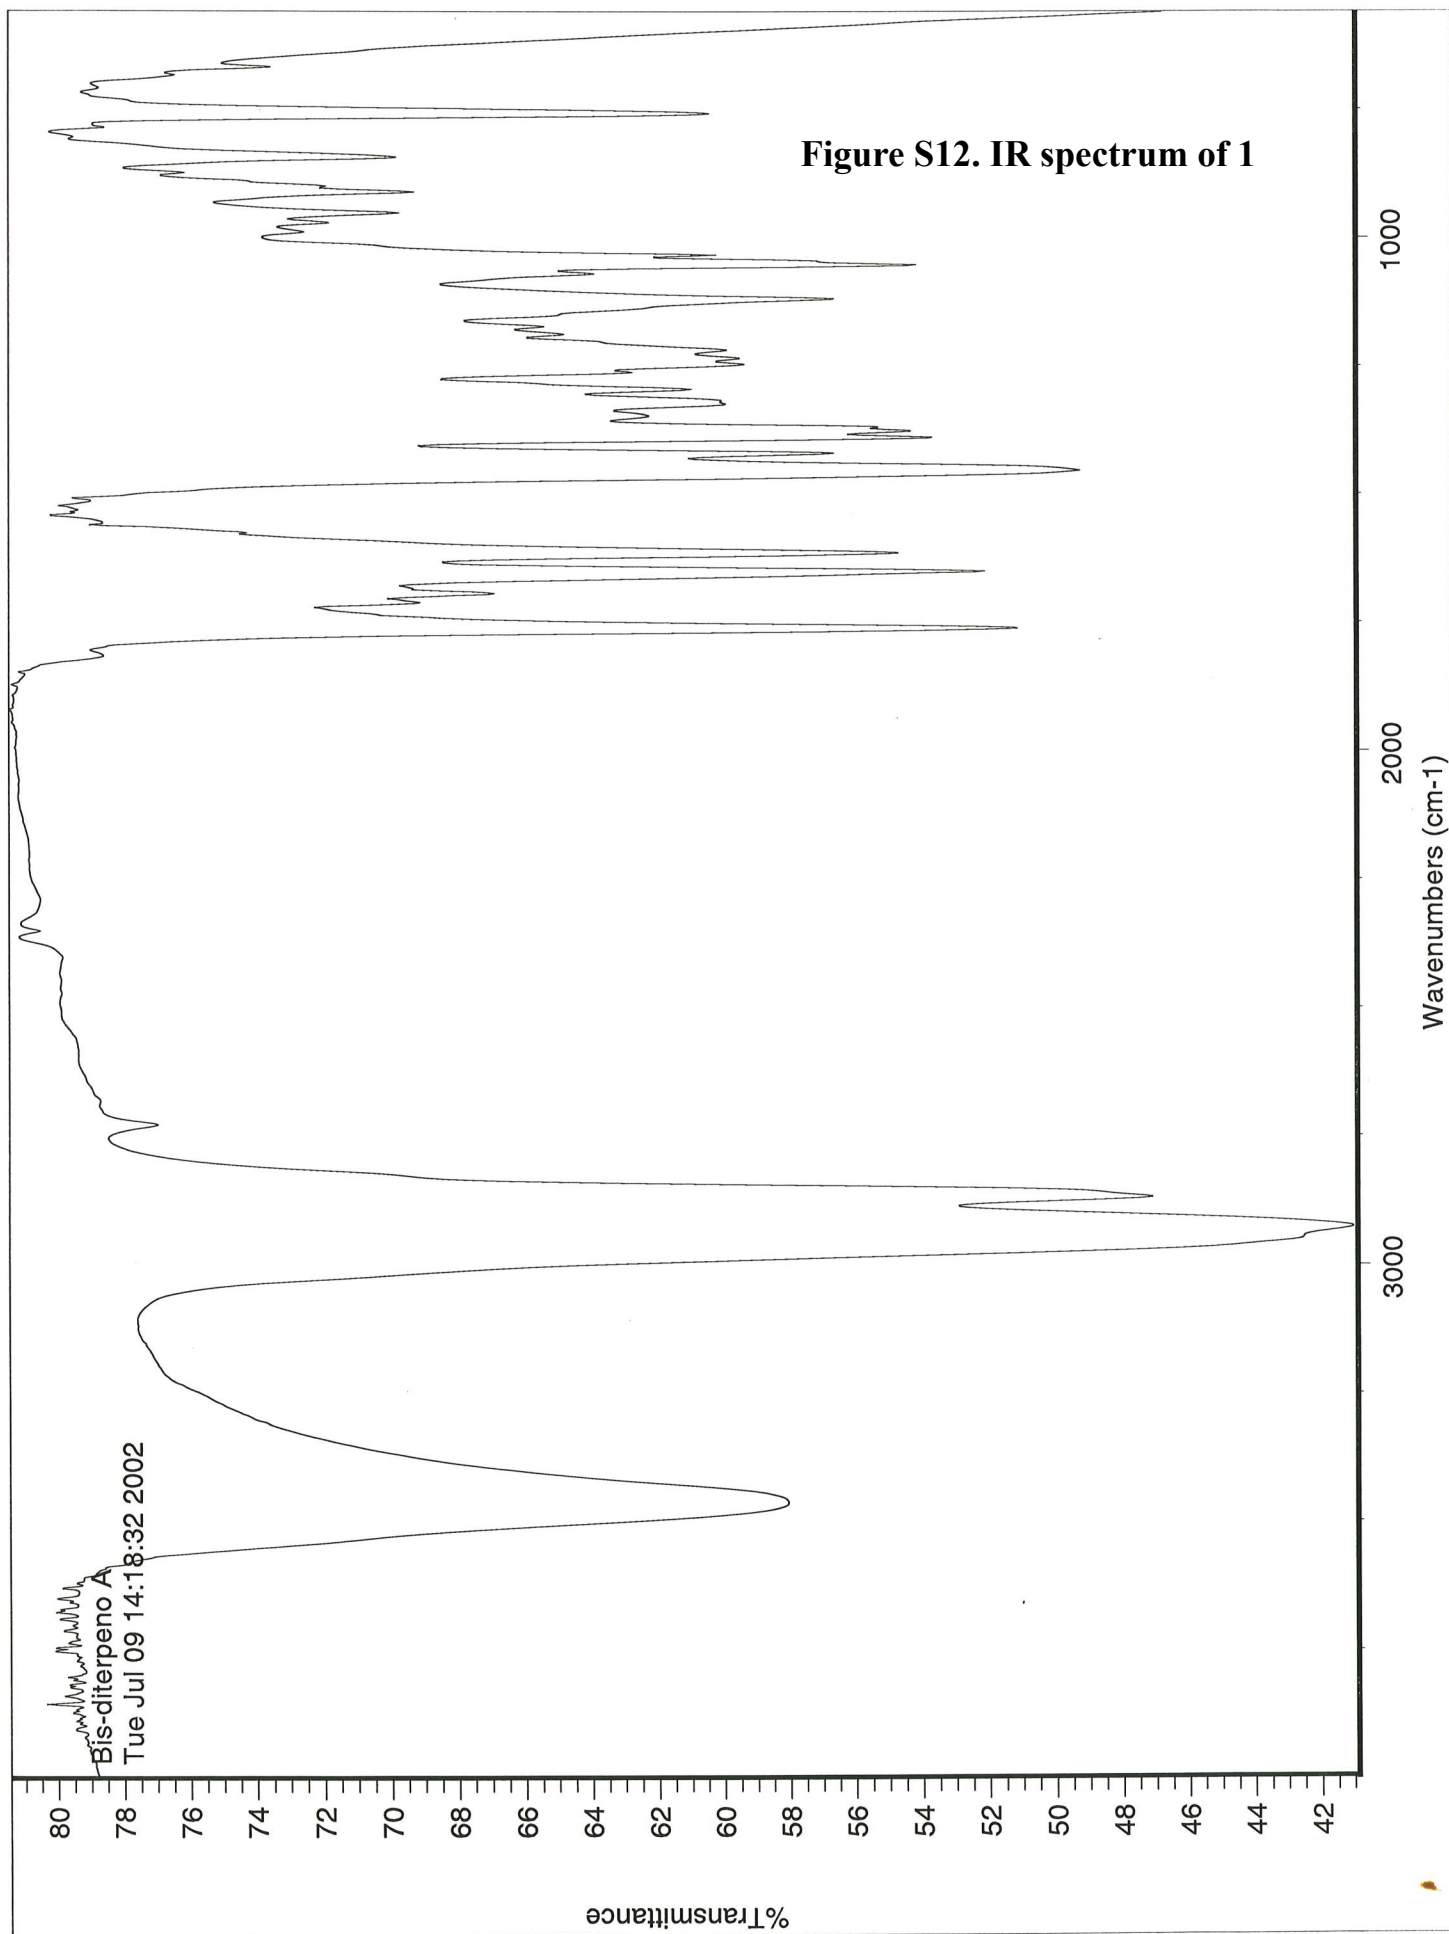



PEH 2 R2 M2  
bis-diterpene

Figure S13. <sup>1</sup>H NMR (500 MHz, CDCl<sub>3</sub>) spectrum of 2 (expansion)

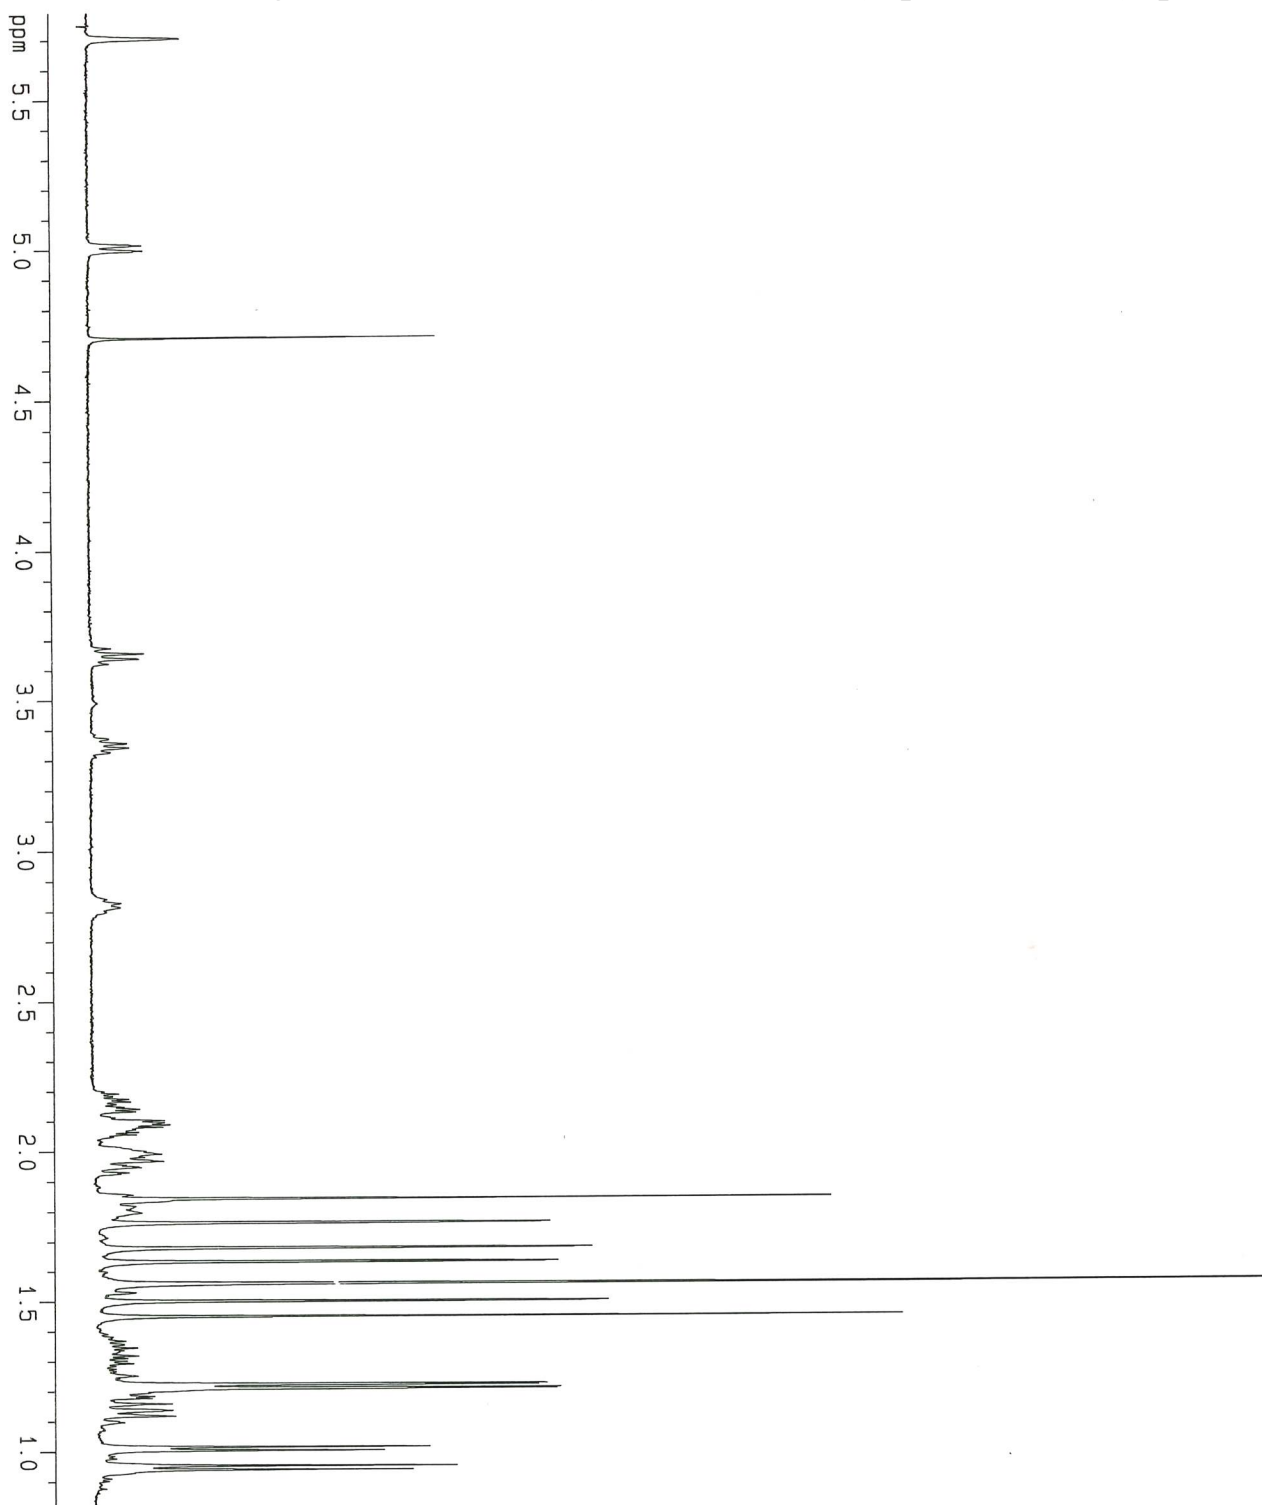

Current Data Parameters  
NAME peh2r2m2y  
EXPNO 1  
PROCNO 1

F2 - Acquisition Parameters  
Date\_ 20020220  
Time 9.36  
INSTRUM spect  
PROBHD 5 mm Multinu  
PULPROG zg30  
TD 32768  
FIDRES 0.22142 Hz  
AQ 2.2610421 sec  
RG 724.1  
DM 69.000 usec  
DE 6.00 usec  
TE 300.0 K  
D1 1.00000000 sec  
P1 10.00 usec  
SFO1 500.1328885 MHz  
NUC1 <sup>1</sup>H  
PL1 0.00 dB

F2 - Processing parameters  
SI 16384  
SF 500.1300135 MHz  
WDW EM  
SSB 0  
LB 0.30 Hz  
GB 0  
PC 1.00

1D NMR plot parameters  
CX 20.00 cm  
F1P 5.792 ppm  
F1 2896.57 Hz  
F2P 0.809 ppm  
F2 404.49 Hz  
PPMCM 0.24914 ppm/cm  
HZCM 124.60435 Hz/cm

Figure S14. <sup>1</sup>H NMR (500 MHz, CDCl<sub>3</sub>) spectrum of 2 (expansion)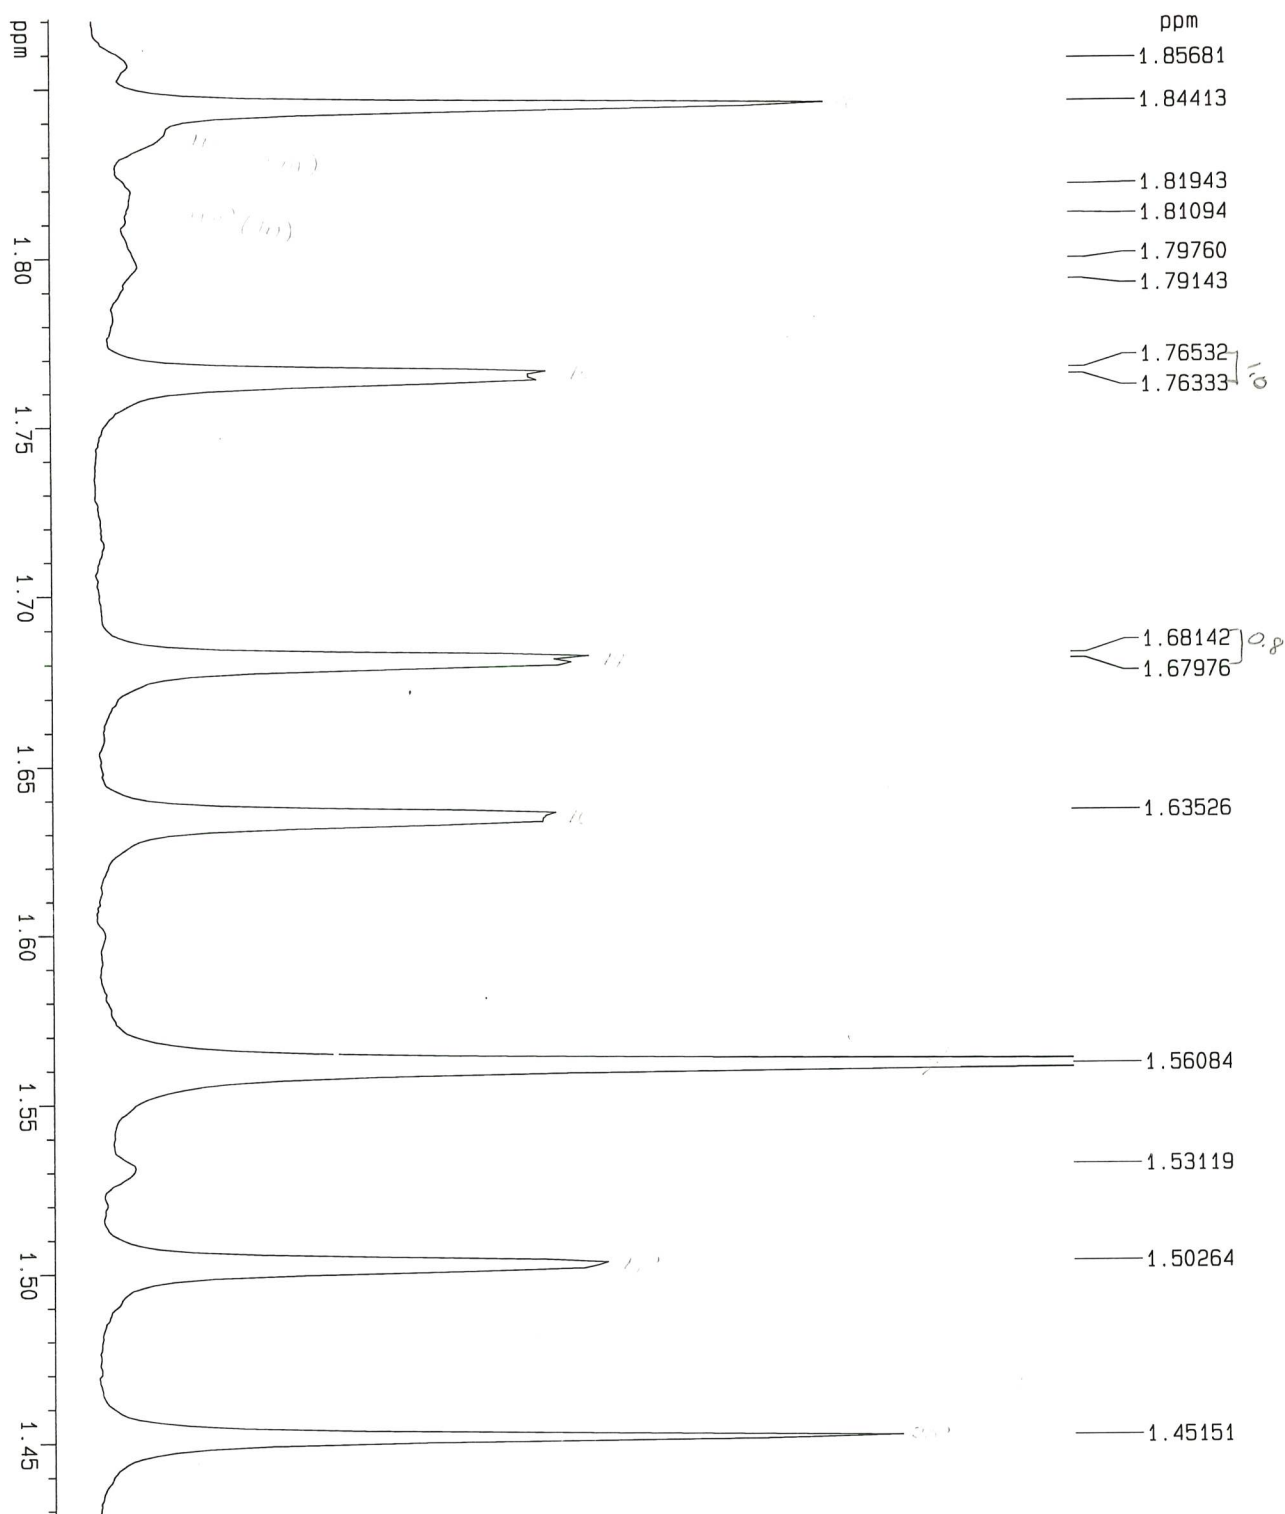

PEH 2 R2 M2  
bis-diterpene

Current Data Parameters  
NAME pen2r2m2y  
EXPNO 1  
PROCNO 1

F2 - Acquisition Parameters  
Date\_ 20020220  
Time 9.36  
INSTRUM spect  
PROBHD 5 mm Multinu  
PULPROG zg30  
TD 32768  
SOLVENT CDCl3  
NS 64  
DS 2  
SMH 7246.377 Hz  
FIDRES 0.221142 Hz  
AQ 2.2610421 sec  
RG 724.1  
DM 69.000 usec  
DE 6.00 usec  
TE 300.0 K  
D1 1.00000000 sec  
P1 10.00 usec  
SF01 500.1328885 MHz  
NUC1 <sup>1</sup>H  
PL1 0.00 dB

F2 - Processing parameters  
SI 16384  
SF 500.1300135 MHz  
WDW EM  
SSB 0  
LB 0.30 Hz  
GB 0  
PC \* 0.00

1D NMR plot parameters  
CX 20.00 cm  
F1P 1.871 ppm  
F1 935.64 Hz  
F2P 1.428 ppm  
F2 714.37 Hz  
PPMCM 0.02212 ppm/cm  
HZCM 11.06349 Hz/cm

PEH 2 R2 M2 Y

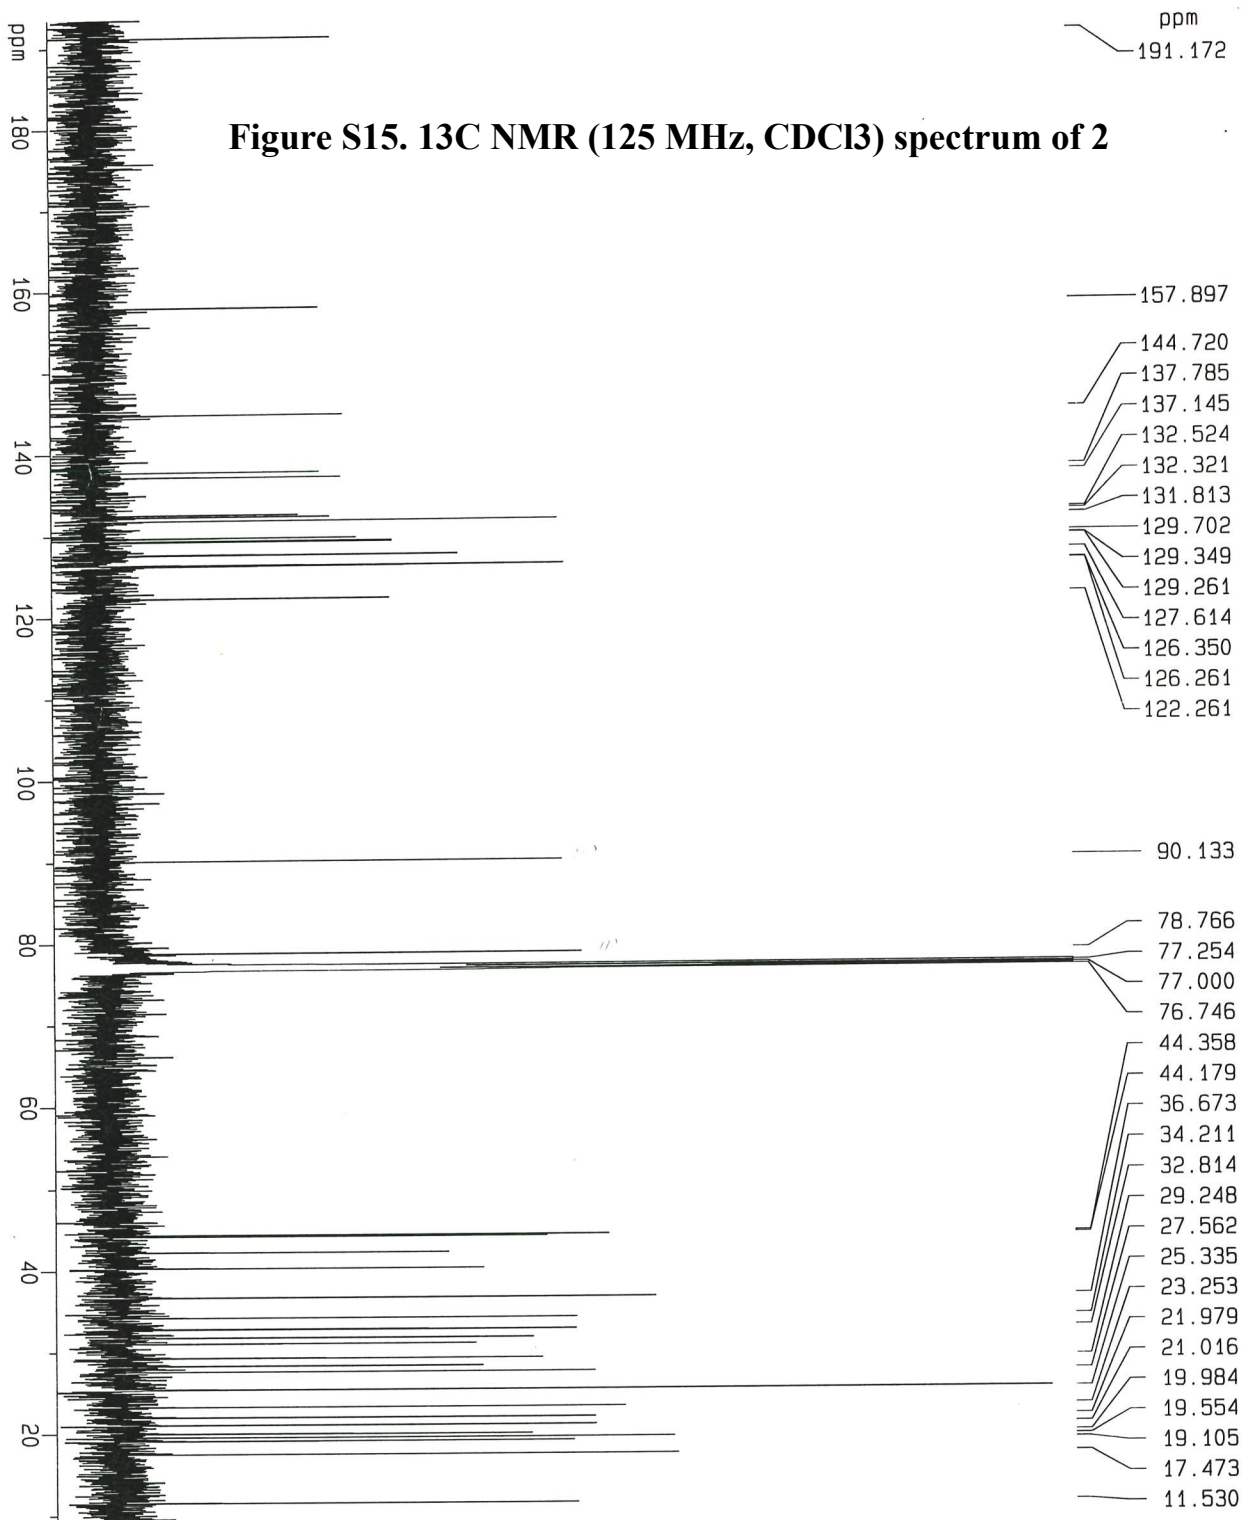

Current Data Parameters

|        |           |
|--------|-----------|
| NAME   | peh2r2m2y |
| EXPNO  | 2         |
| PROCNO | 1         |

F2 - Acquisition Parameters

|         |                 |
|---------|-----------------|
| Date_   | 20020221        |
| Time    | 16.44           |
| INSTRUM | 5 mm Multinu    |
| PROBHD  | z9p930          |
| PULPROG | 65536           |
| TD      | CDCl3           |
| SOLVENT | 25204           |
| NS      | 2               |
| DS      | 30303.031 Hz    |
| SMH     | 0.462388 Hz     |
| FIDRES  | 1.0813940 sec   |
| RG      | 9195.2          |
| DW      | 16.500 usec     |
| DE      | 6.00 usec       |
| TE      | 300.0 K         |
| D12     | 0.0000200 sec   |
| PL13    | 22.00 dB        |
| D1      | 1.00000000 sec  |
| CPDPRG2 | waitz16         |
| PCPD2   | 102.00 usec     |
| SFO2    | 500.132005 MHz  |
| NUC2    | $^1\text{H}$    |
| PL2     | 0.00 dB         |
| PL12    | 22.00 dB        |
| P1      | 7.87 usec       |
| SFO1    | 125.7709955 MHz |
| NUC1    | $^{13}\text{C}$ |
| PL1     | 2.00 dB         |
| D11     | 0.03000000 sec  |

F2 - Processing parameters

|     |                 |
|-----|-----------------|
| SI  | 32768           |
| SF  | 125.7577897 MHz |
| WDW | EM              |
| SSB | 0               |
| LB  | 1.00 Hz         |
| GB  | 0               |
| PC  | 1.00            |

1D NMR plot parameters

|       |                  |
|-------|------------------|
| CX    | 20.00 cm         |
| F1P   | 193.428 ppm      |
| F1    | 24325.07 Hz      |
| F2P   | 9.305 ppm        |
| F2    | 1170.14 Hz       |
| PRMCM | 9.20616 ppm/cm   |
| HZCM  | 1157.74695 Hz/cm |

Figure S16. <sup>13</sup>C NMR (125 MHz, CDCl<sub>3</sub>) spectrum of 2 (expansion)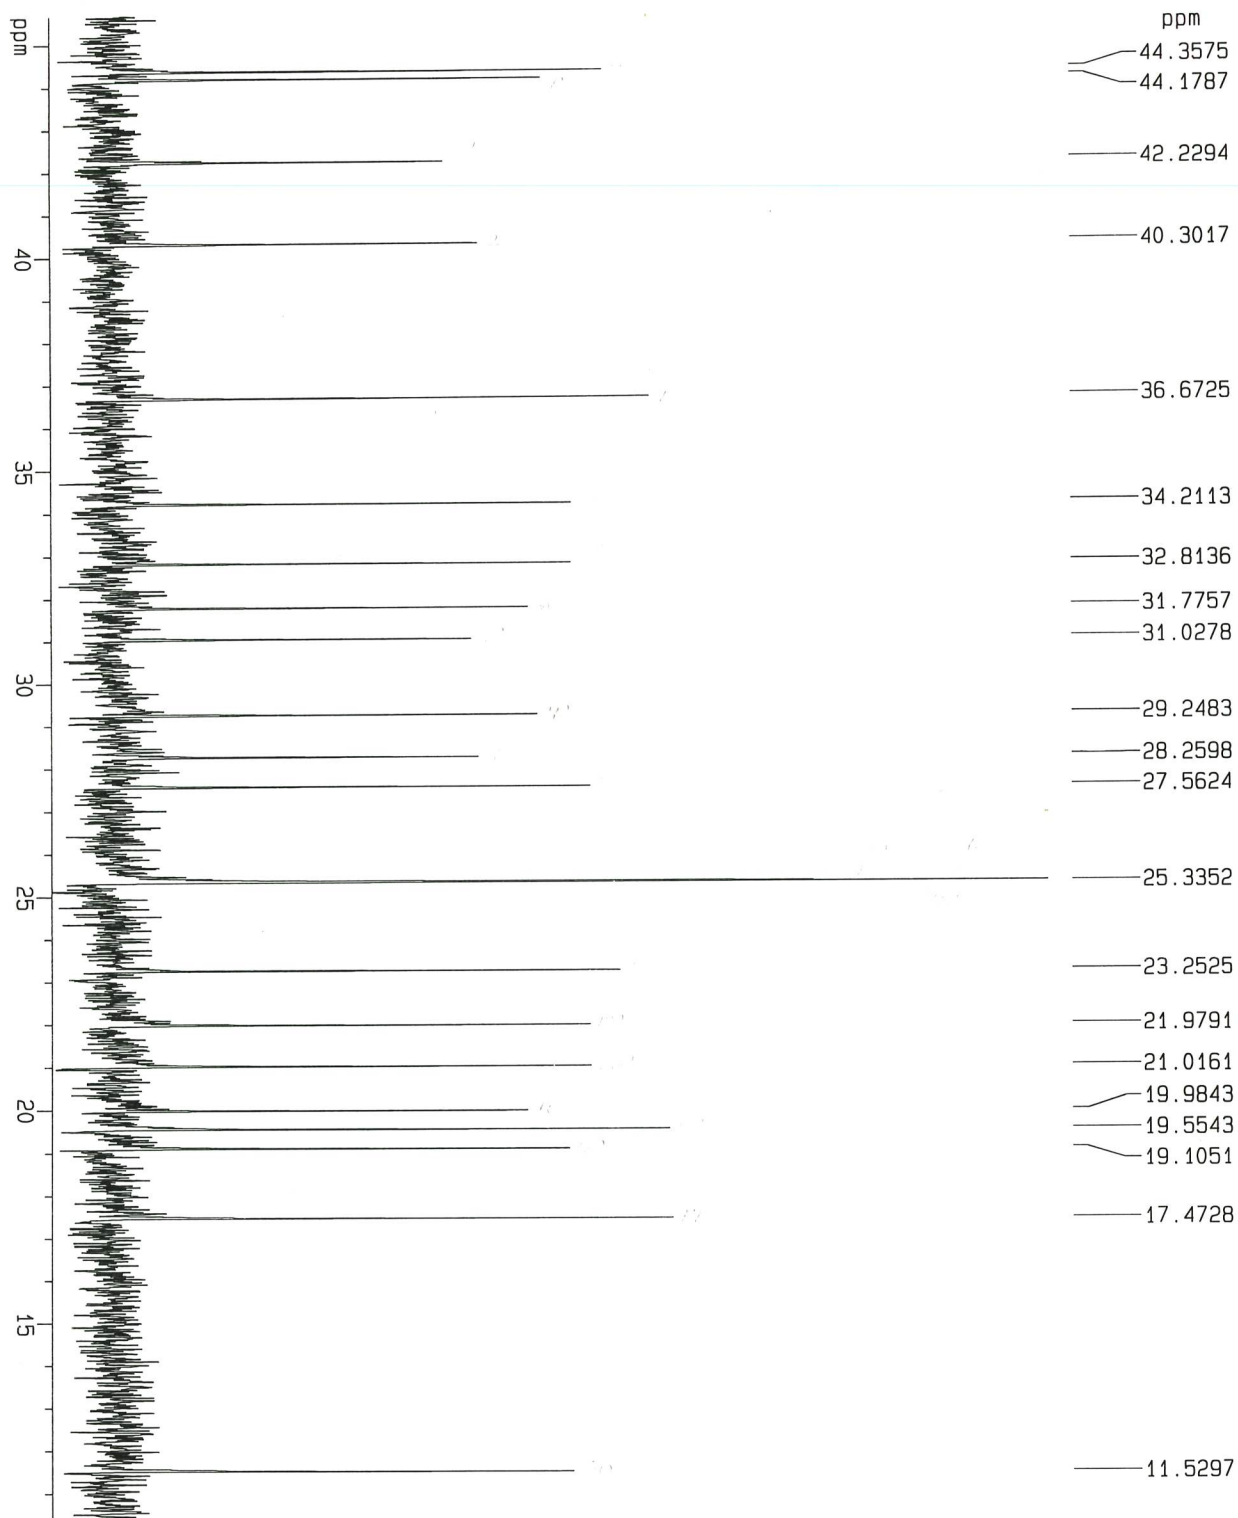

PEH 2 R2 M2 Y

Current Data Parameters

|        |           |
|--------|-----------|
| NAME   | pen2r2m2y |
| EXPNO  | 2         |
| PROCNO | 1         |

F2 - Acquisition Parameters

|         |                 |
|---------|-----------------|
| Date_   | 20020221        |
| Time    | 16.44           |
| INSTRUM | spect           |
| PROBHD  | 5 mm Multinu    |
| PULPROG | zgpg30          |
| TD      | 65536           |
| SOLVENT | CDCl3           |
| NS      | 25204           |
| DS      | 2               |
| SMH     | 30303.031 Hz    |
| FIDRES  | 0.462388 Hz     |
| AQ      | 1.0813940 sec   |
| RG      | 9195.2          |
| DW      | 16.500 usec     |
| DE      | 6.00 usec       |
| TE      | 300.0 K         |
| D12     | 0.00002000 sec  |
| PL13    | 22.00 dB        |
| D1      | 1.00000000 sec  |
| CPDPRG2 | waltz16         |
| PCPD2   | 102.00 usec     |
| SFO2    | 500.1320005 MHz |
| NUC2    | <sup>1</sup> H  |
| PL2     | 0.00 dB         |
| PL12    | 22.00 dB        |
| P1      | 7.87 usec       |
| SFO1    | 125.7709955 MHz |
| NUC1    | <sup>13</sup> C |
| PL1     | 2.00 dB         |
| D11     | 0.03000000 sec  |

F2 - Processing parameters

|     |                 |
|-----|-----------------|
| SI  | 32768           |
| SF  | 125.7577897 MHz |
| WDW | EM              |
| SSB | 0               |
| LB  | 1.00 Hz         |
| GB  | 0               |
| PC  | 1.00            |

1D NMR plot parameters

|       |                 |
|-------|-----------------|
| CX    | 20.00 cm        |
| F1P   | 45.684 ppm      |
| F1    | 5745.10 Hz      |
| F2P   | 10.418 ppm      |
| F2    | 1310.19 Hz      |
| PPMCM | 1.76328 ppm/cm  |
| HZCM  | 221.74588 Hz/cm |

Figure S17. COSY spectrum of 2

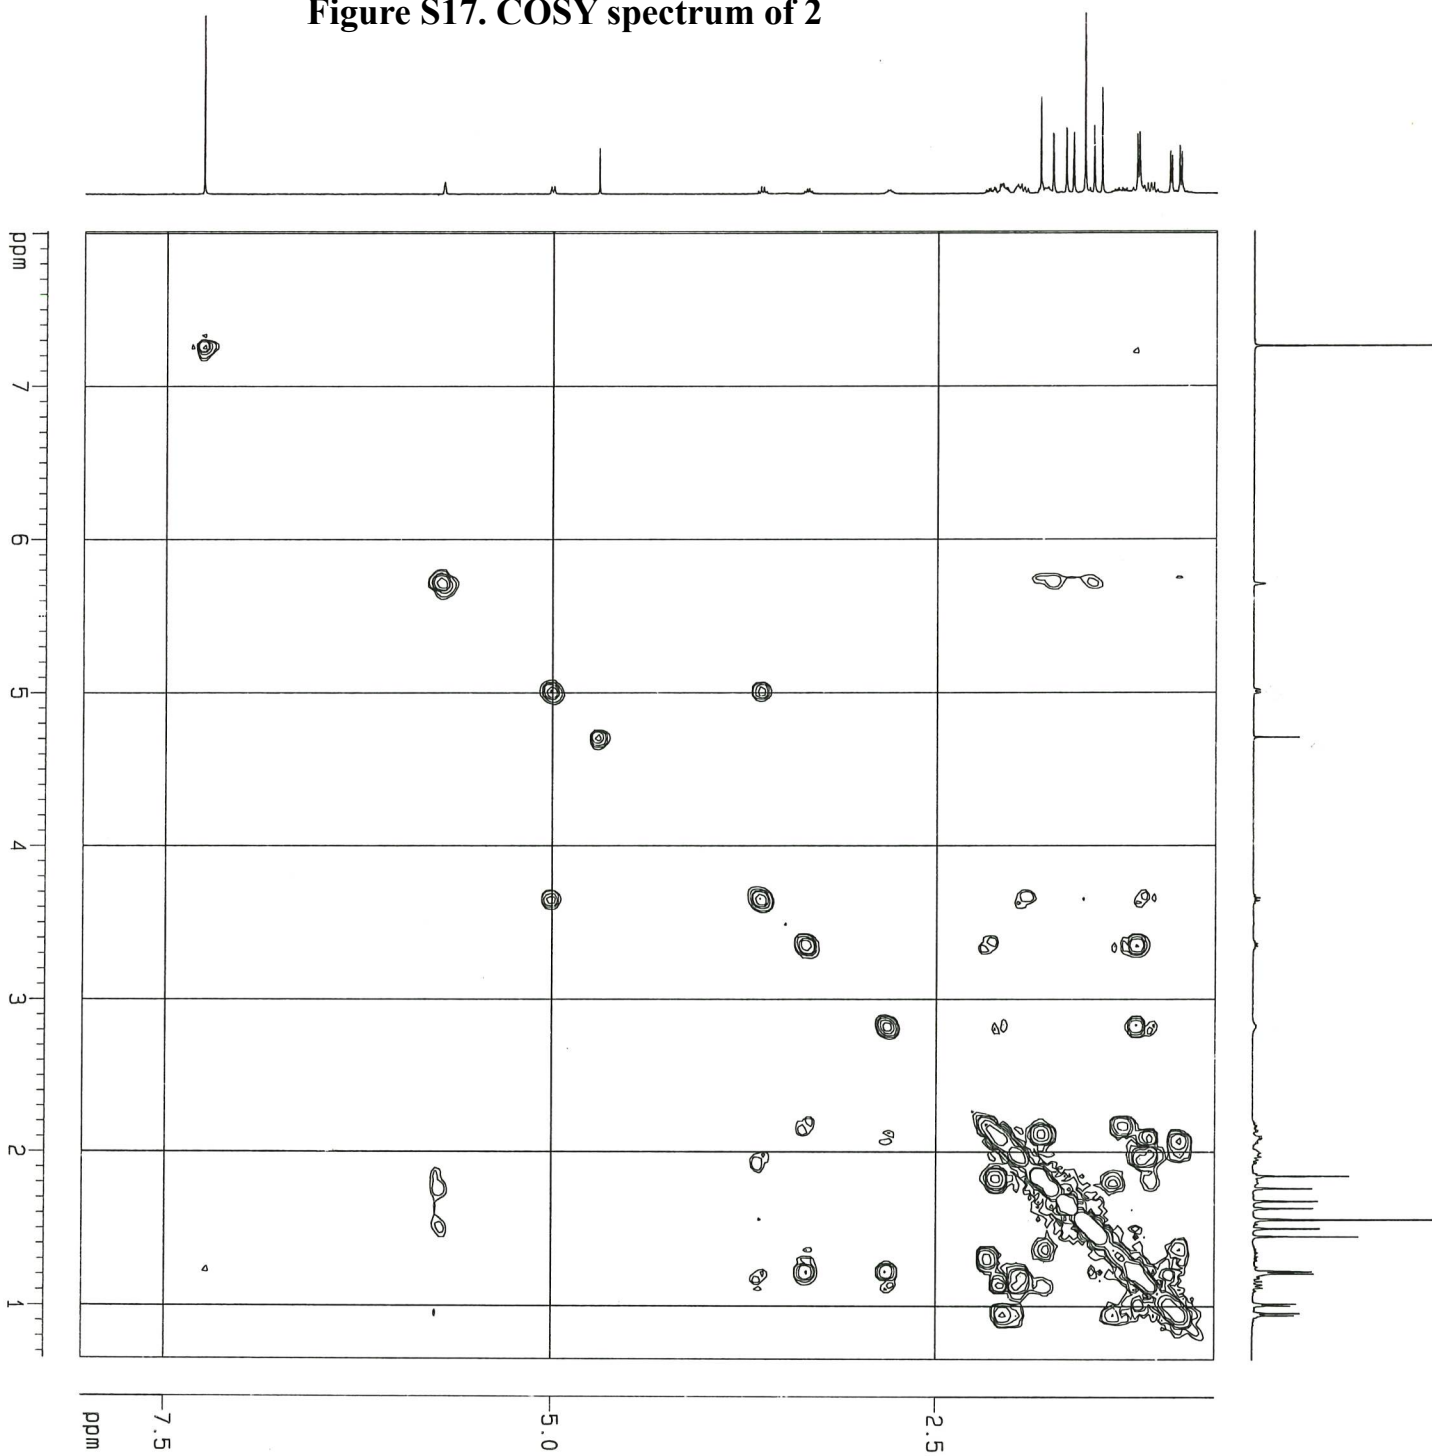

Current Data Parameters

|        |           |
|--------|-----------|
| NAME   | perchancy |
| EXPNO  | 5         |
| PROCNO | 1         |

F2 - Acquisition Parameters

|         |                |
|---------|----------------|
| Date_   | 20020220       |
| Time    | 14.10          |
| INSTRUM | 5 mm Multinu   |
| PROBHD  | cosy/45        |
| PULPROG | 1024           |
| TD      | 1024           |
| SOLVENT | CDCl3          |
| NS      | 16             |
| DS      | 16             |
| SMU     | 7246.377 Hz    |
| FIDRES  | 7.076540 Hz    |
| AQ      | 0.0707060 sec  |
| RG      | 512            |
| DW      | 69.000 usec    |
| DE      | 6.00 usec      |
| TE      | 300.0 K        |
| D1      | 1.00000000 sec |
| P1      | 10.00 usec     |
| SFO1    | 500.132885 MHz |
| NUC1    | 1H             |
| PL1     | 0.00 dB        |
| DO      | 0.00000300 sec |
| INO     | 0.00013800 sec |

F1 - Acquisition Parameters

|        |              |
|--------|--------------|
| NDO    | 1            |
| TD     | 256          |
| SFO1   | 500.1329 MHz |
| FIDRES | 28.306160 Hz |
| SW     | 14.489 ppm   |

F2 - Processing parameters

|     |                |
|-----|----------------|
| SI  | 512            |
| SF  | 500.130135 MHz |
| WDW | SINE           |
| SSB | 0              |
| LB  | 0.00 Hz        |
| GB  | 0              |
| PC  | 0.00           |

F1 - Processing parameters

|     |                 |
|-----|-----------------|
| SI  | 512             |
| MC2 | OF              |
| SF  | 500.1300135 MHz |
| WDW | SINE            |
| SSB | 0               |
| LB  | 0.00 Hz         |
| GB  | 0               |

2D NMR plot parameters

|        |                 |
|--------|-----------------|
| CX2    | 15.00 cm        |
| CX1    | 15.00 cm        |
| F2PULO | 8.012 ppm       |
| F2LO   | 4007.28 Hz      |
| F2PHI  | 0.655 ppm       |
| F2HI   | 327.48 Hz       |
| F1PULO | 8.041 ppm       |
| F1LO   | 4021.44 Hz      |
| F1PHI  | 0.711 ppm       |
| F1HI   | 355.79 Hz       |
| F2PCKM | 0.49051 ppm/cm  |
| F2HCKM | 245.32004 Hz/cm |
| F1PCKM | 0.48863 ppm/cm  |
| F1HCKM | 244.37650 Hz/cm |



Figure S18. HMQC spectrum of 2

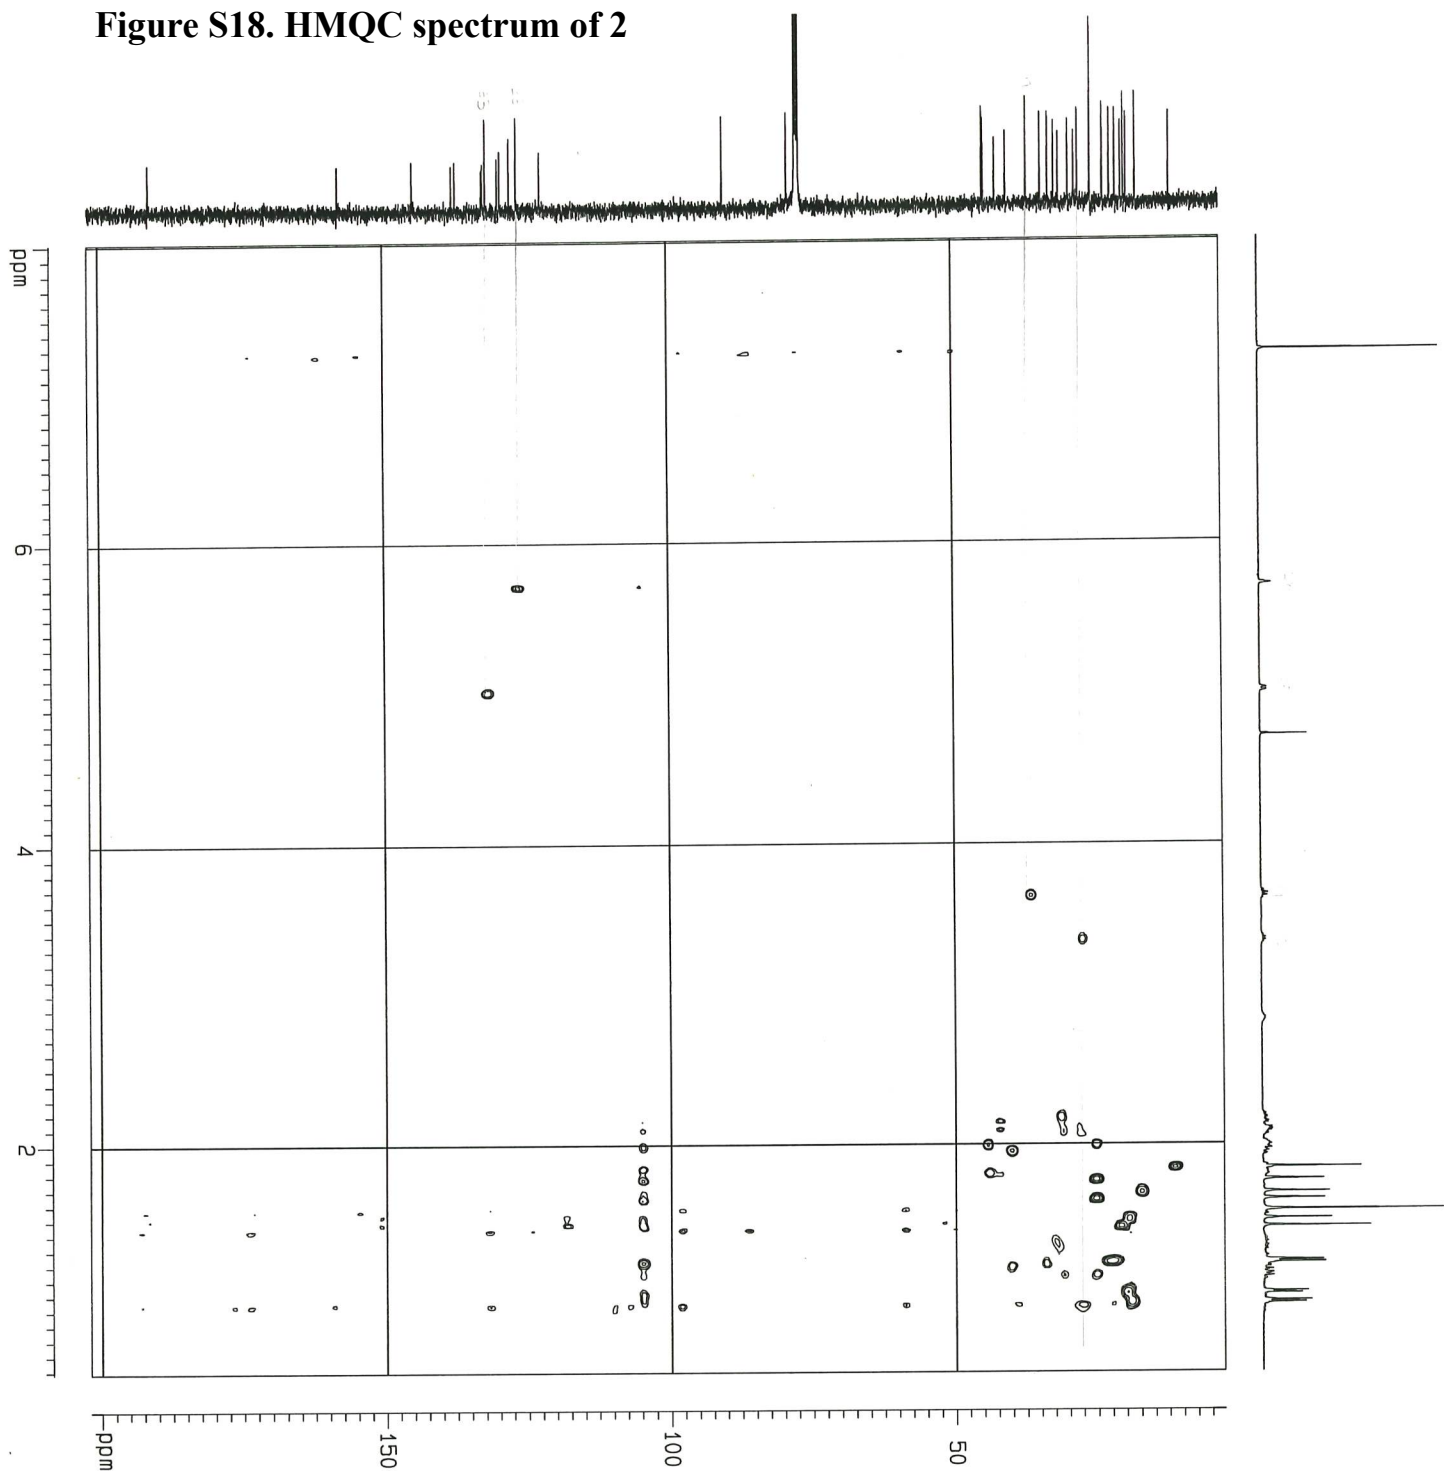

Current Data Parameters  
NAME pentramy  
EXPNO 10  
PROCNO 1

F2 - Acquisition Parameters  
Date\_ 20020220  
Time 16.02  
INSTRUM spect  
PROBHD 5 mm Multinu  
PULPROG invtp  
TD 1024  
SOLVENT CDCl3  
NS 16  
DS 32  
SMH 7246.377 Hz  
FIDRES 7.076540 Hz  
AQ 0.0707060 sec  
RG 3649.1  
DM 69.000 usec  
DE 6.00 usec  
TE 300.0 K  
D1 1.25000000 sec  
P1 10.00 usec  
SF01 500.132885 MHz  
NUC1 1H  
PL1 0.00 dB  
D2 0.00345000 sec  
PL2 2.00 dB  
P2 20.00 usec  
P4 14.20 usec  
SF02 125.770955 MHz  
NUC2 13C  
D7 0.40000001 sec  
P3 7.10 usec  
D0 0.00000300 sec  
PL12 22.00 dB  
CPOPRG2 garp  
PCPD2 74.00 usec  
IN0 0.00000825 sec

F1 - Acquisition Parameters  
NDD 4  
TD 256  
SF01 125.771 MHz  
FIDRES 118.371216 Hz  
SM 240.939 ppm

F2 - Processing Parameters  
SI 1024  
SF 500.1300135 MHz  
WDW DSINE  
SSB 2  
LB 0.00 Hz  
GB 0  
PC 1.00

F1 - Processing Parameters  
SI 512  
MC2 TPT  
SF 125.7577906 MHz  
WDW SINE  
SSB 2  
LB 0.00 Hz  
GB 0

2D NMR plot parameters  
CX2 15.00 cm  
CX1 15.00 cm  
F2PL0 8.012 ppm  
F2LO 4007.28 Hz  
F2PH1 0.465 ppm  
F2PH1 242.56 Hz  
F1PL0 201.953 ppm  
F1LO 23397.18 Hz  
F1PH1 2.876 ppm  
F1PH1 361.66 Hz  
F2PRCK 0.50183 ppm/cm  
F2PRCK 250.98128 Hz/cm  
F1PRCK 13.27182 ppm/cm  
F1HZCK 1669.03406 Hz/cm

Figure S19. HMQC spectrum of 2 (expansion)

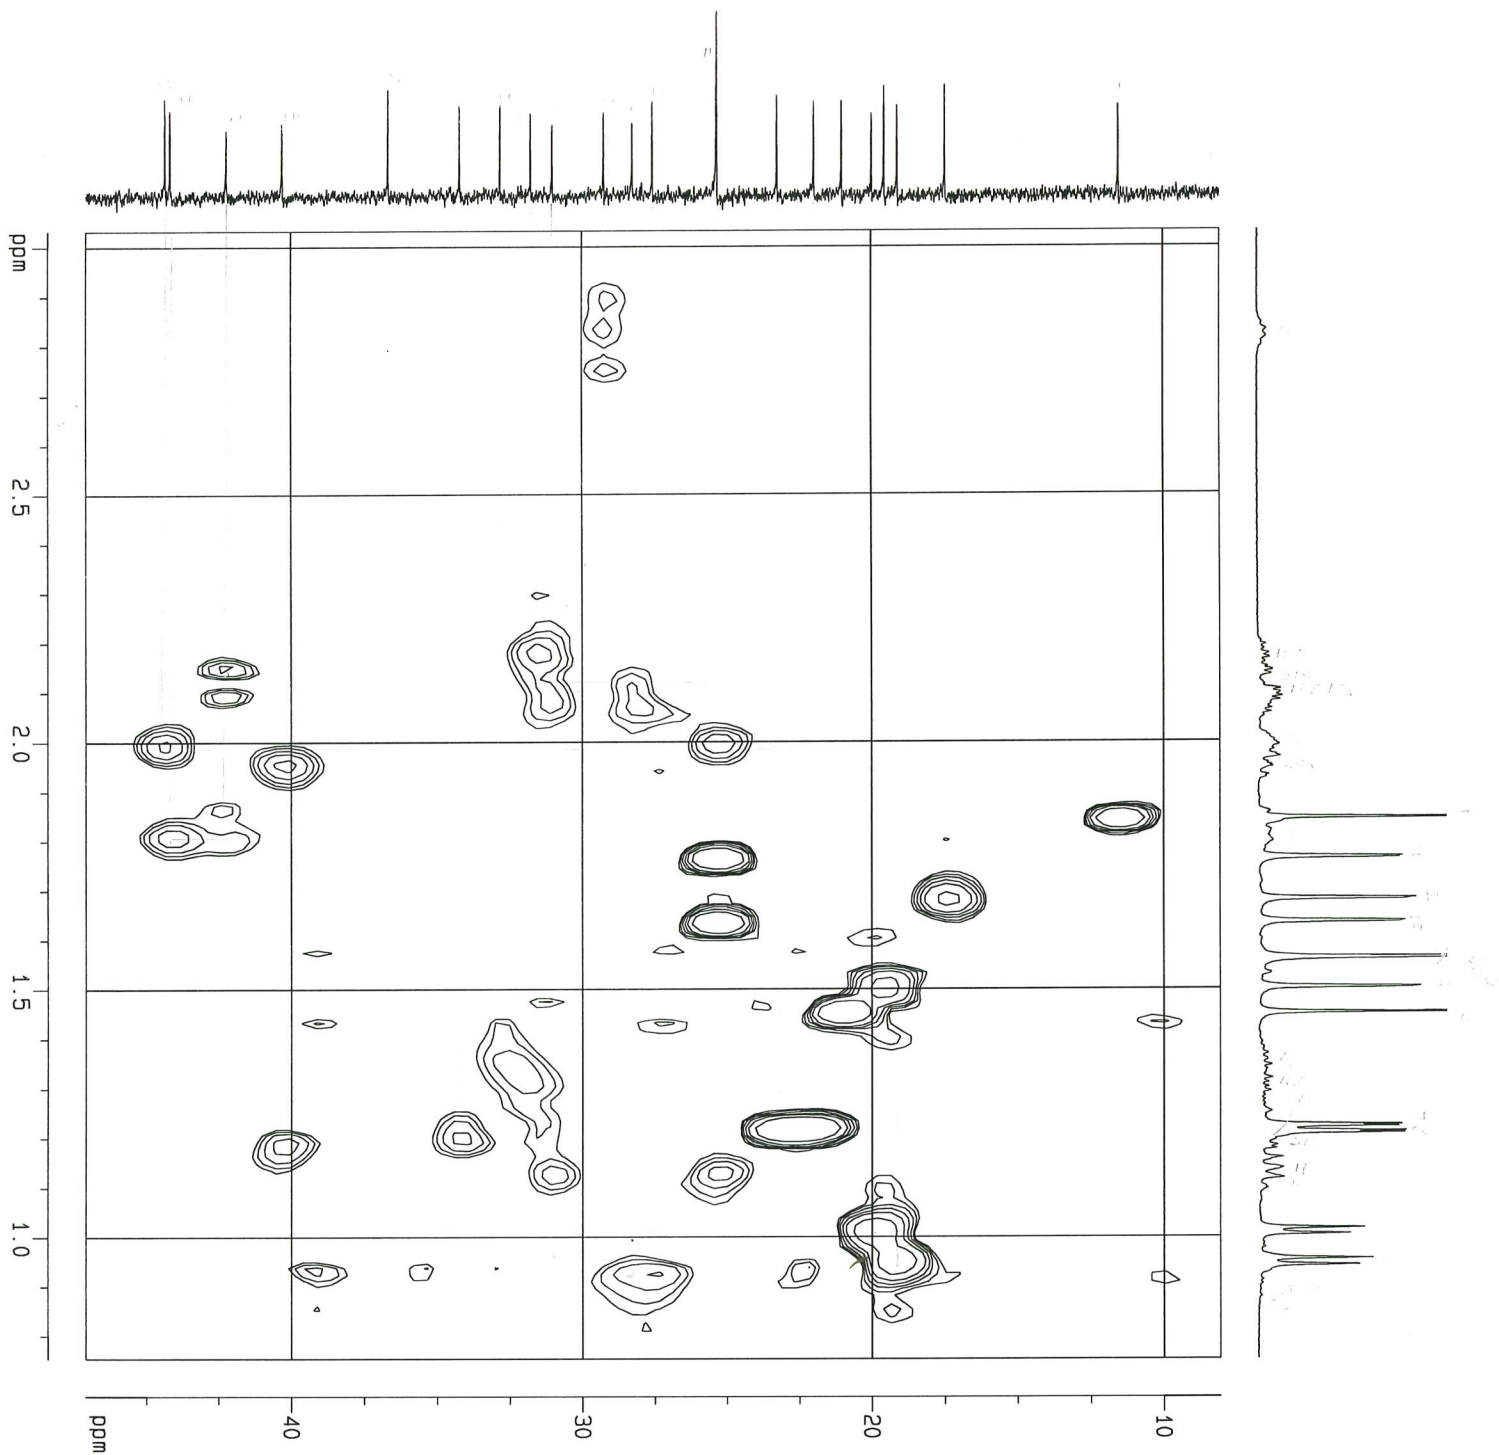

Current Data Parameters

|        |             |
|--------|-------------|
| NAME   | pentan-3-ol |
| EXPNO  | 10          |
| PROCNO | 1           |

F2 - Acquisition Parameters

|         |                 |
|---------|-----------------|
| Date_   | 20020220        |
| Time    | 16.02           |
| INSTRUM | spect           |
| PROBHD  | 5 mm Nujol      |
| PULPROG | zgpg30          |
| TD      | 1024            |
| SOLVENT | CDCl3           |
| NS      | 16              |
| DS      | 32              |
| SWH     | 7246.377 Hz     |
| FIDRES  | 7.076540 Hz     |
| AQ      | 0.0707060 sec   |
| RG      | 3549.1          |
| DM      | 69.000 usec     |
| DE      | 6.00 usec       |
| TE      | 300.0 K         |
| D1      | 1.2500000 sec   |
| P1      | 10.00 usec      |
| SFO1    | 500.1328985 MHz |
| NUC1    | 1H              |
| PL1     | 0.00 dB         |
| D2      | 0.0034500 sec   |
| PL2     | 2.00 dB         |
| P2      | 20.00 usec      |
| P4      | 14.20 usec      |
| SFO2    | 125.7709595 MHz |
| NUC2    | 13C             |
| D7      | 0.4000001 sec   |
| P3      | 7.10 usec       |
| D0      | 0.0000030 sec   |
| PL12    | 22.00 dB        |
| CPDPRG2 | garp            |
| PCPD2   | 74.00 usec      |
| IND     | 0.00000825 sec  |

F1 - Acquisition Parameters

|        |              |
|--------|--------------|
| NO     | 4            |
| TD     | 256          |
| SFO1   | 125.771 MHz  |
| FIDRES | 118.37216 Hz |
| SM     | 240.938 ppm  |

F2 - Processing parameters

|     |                |
|-----|----------------|
| SI  | 1024           |
| SF  | 500.130135 MHz |
| WDW | OSINE          |
| SSB | 2              |
| LB  | 0.00 Hz        |
| GB  | 0              |
| PC  | 1.00           |

F1 - Processing parameters

|     |                |
|-----|----------------|
| SI  | 512            |
| MC2 | 125.757790 MHz |
| SF  | 125.757790 MHz |
| WDW | SINE           |
| SSB | 2              |
| LB  | 0.00 Hz        |
| GB  | 0              |

2D NMR plot parameters

|        |                 |
|--------|-----------------|
| CK2    | 15.00 cm        |
| CK1    | 15.00 cm        |
| FEHL0  | 3.032 ppm       |
| FEHL   | 1516.34 Hz      |
| FEH1   | 0.754 ppm       |
| FEH2   | 37.102 Hz       |
| FHLO   | 47.115 ppm      |
| FHLO   | 5525.11 Hz      |
| FH1    | 6.035 ppm       |
| FH1    | 1012.71 Hz      |
| FEPRCK | 3.15167 ppm/cm  |
| FEPRCK | 75.55486 Hz/cm  |
| F1PRCK | 2.60416 ppm/cm  |
| F1PRCK | 327.49388 Hz/cm |

Figure S20. HMBC spectrum of 2

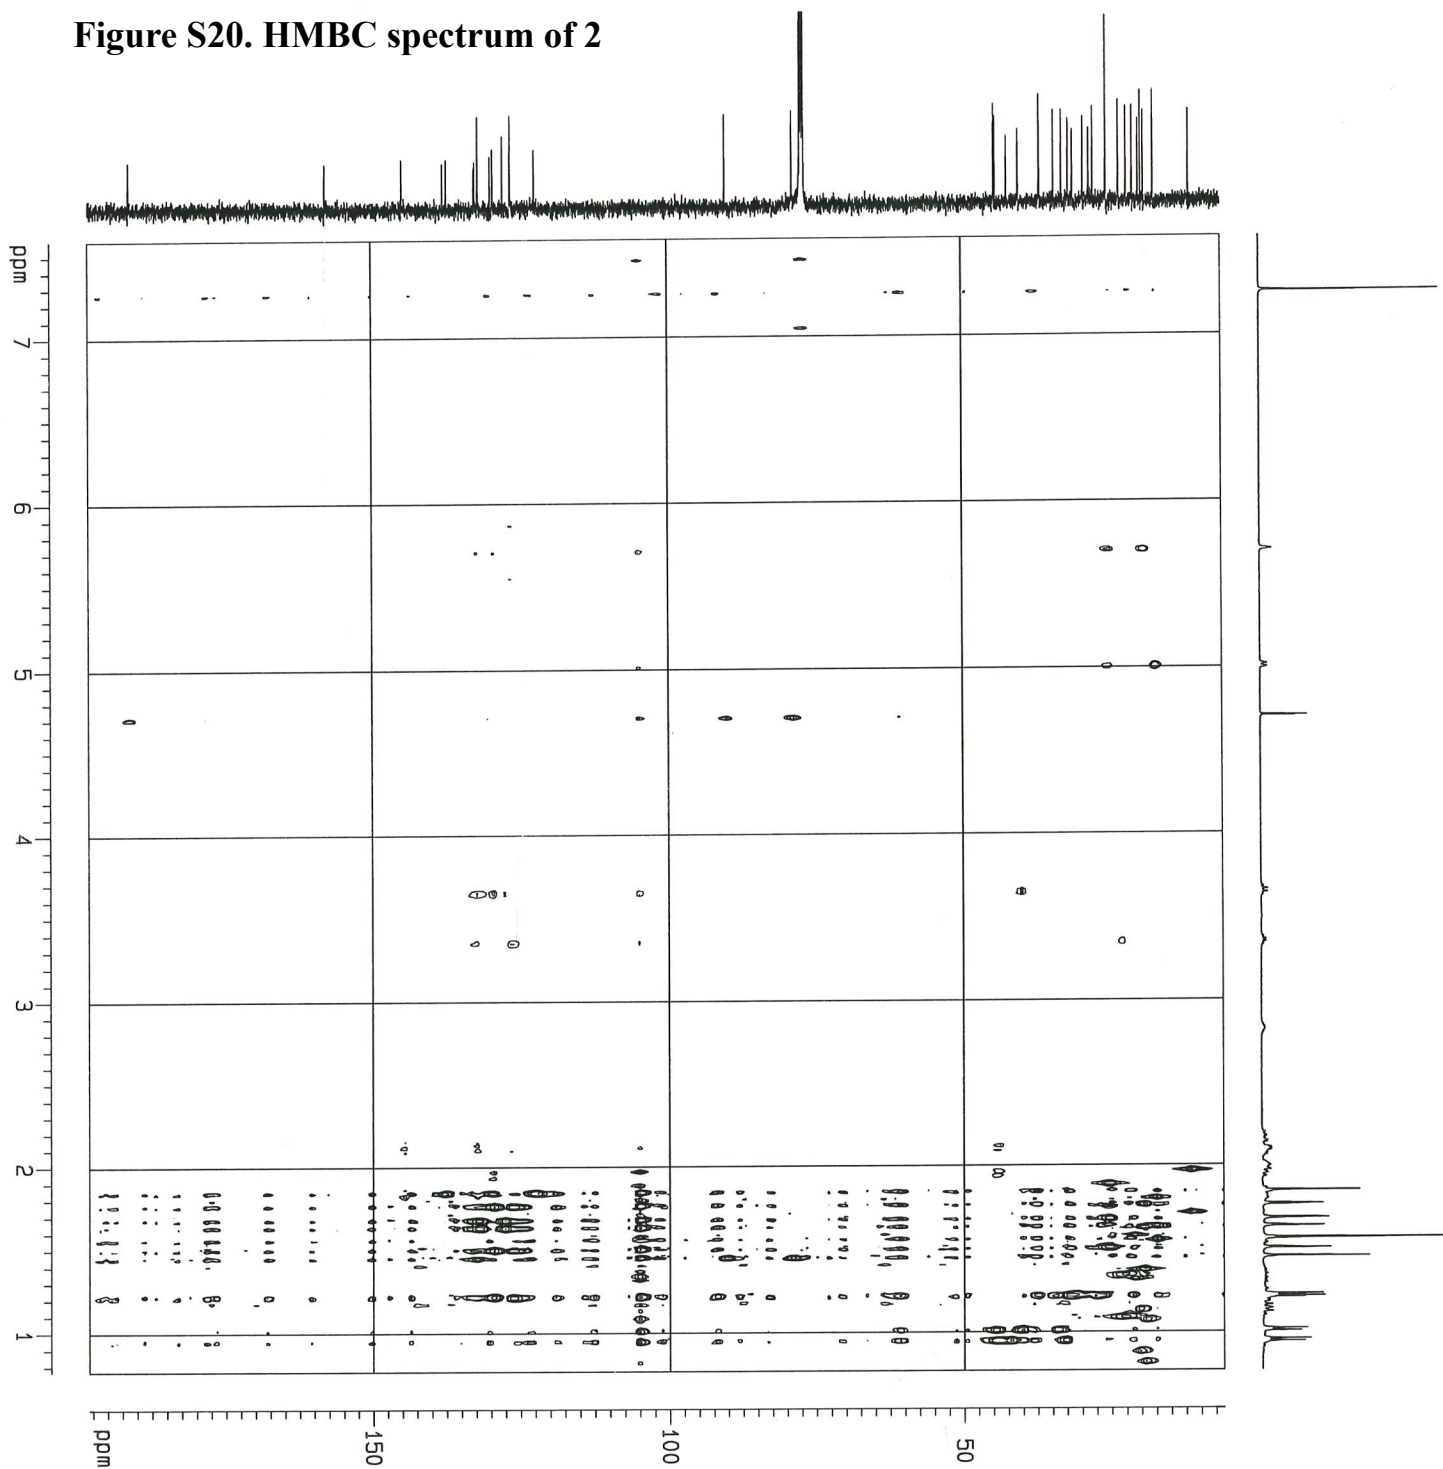

| Current Data Parameters     |                  |
|-----------------------------|------------------|
| NAME                        | pen-2-en-1-ol    |
| EXPNO                       | 15               |
| PROCNO                      | 1                |
| F2 - Acquisition Parameters |                  |
| Date_                       | 20202220         |
| Time                        | 18.12            |
| INSTRUM                     | spect            |
| PROBHD                      | 5 mm Multinu     |
| PULPROG                     | inv4dprnd        |
| TD                          | 4096             |
| SOLVENT                     | CDCl3            |
| NS                          | 104              |
| DS                          | 32               |
| SWH                         | 7246.377 Hz      |
| FIDRES                      | 1.765135 Hz      |
| AQ                          | 0.265740 sec     |
| RG                          | 1149.4           |
| DM                          | 69.000 usec      |
| DE                          | 6.00 usec        |
| TE                          | 300.0 K          |
| D1                          | 1.50000000 sec   |
| P1                          | 10.00 usec       |
| SFO1                        | 500.136885 MHz   |
| NUC1                        | 1H               |
| PL1                         | 0.00 dB          |
| P2                          | 0.00300000 sec   |
| P3                          | 7.10 usec        |
| SFO2                        | 125.770955 MHz   |
| NUC2                        | 13C              |
| PL2                         | 2.00 dB          |
| D6                          | 0.05000000 sec   |
| D0                          | 0.00003000 sec   |
| P2                          | 20.00 usec       |
| INO                         | 0.00001650 sec   |
| F1 - Acquisition Parameters |                  |
| NDO                         | 2                |
| TD                          | 256              |
| SFO1                        | 125.771 MHz      |
| FIDRES                      | 118.371216 Hz    |
| SW                          | 240.538 ppm      |
| F2 - Processing parameters  |                  |
| SI                          | 2048             |
| SF                          | 500.1300135 MHz  |
| WDW                         | Q5INE            |
| SSB                         | 4                |
| LB                          | 0.00 Hz          |
| GB                          | 0                |
| PC                          | 1.00             |
| F1 - Processing parameters  |                  |
| SI                          | 256              |
| MC2                         | GF               |
| SF                          | 125.757306 MHz   |
| WDW                         | SINE             |
| SSB                         | 2                |
| LB                          | 0.00 Hz          |
| GB                          | 0                |
| 2D NMR plot parameters      |                  |
| CX2                         | 15.00 cm         |
| CX1                         | 15.00 cm         |
| F2FLO                       | 7.3593 ppm       |
| F2LO                        | 3796.52 Hz       |
| F2PH1                       | 0.766 ppm        |
| F2H1                        | 364.09 Hz        |
| F1FLO                       | 199.188 ppm      |
| F1LO                        | 24923.69 Hz      |
| F1PH1                       | 6.170 ppm        |
| F1H1                        | 775.96 Hz        |
| F2PCHM                      | 0.45514 ppm/cm   |
| F2H2CM                      | 227.62871 Hz/cm  |
| F1PCHM                      | 12.80118 ppm/cm  |
| F1H2CM                      | 1609.84851 Hz/cm |

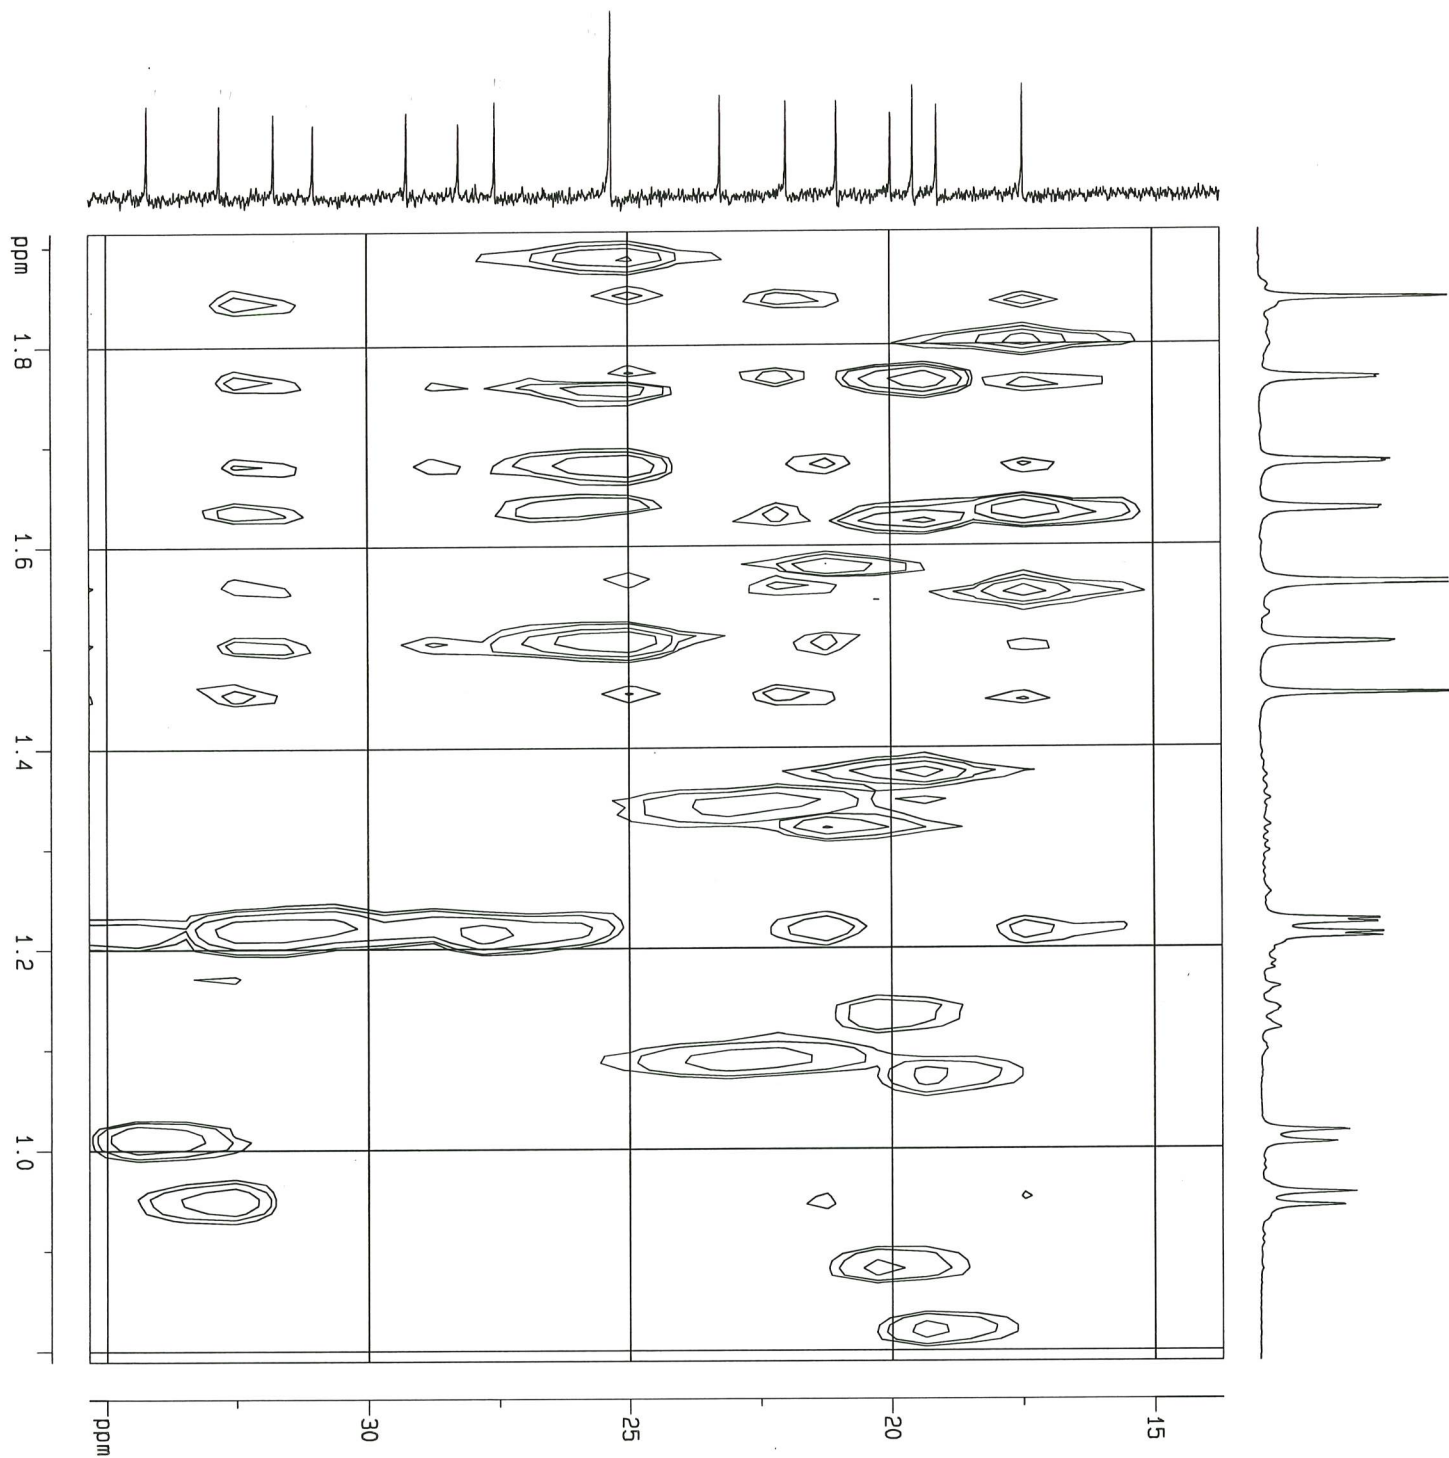

| Current Data Parameters     |                 |       |
|-----------------------------|-----------------|-------|
| NAME                        | penh-rmly       | 15    |
| EXPNO                       | 1               | 1     |
| PROCNO                      | 1               | 1     |
| F2 - Acquisition Parameters |                 |       |
| Date_                       | 20020220        | 18.12 |
| Time                        | 18.12           | 15    |
| INSTRUM                     | spec            | 1     |
| PROBHD                      | 5 mm NMR/1H     | 1     |
| PULPROG                     | zgpg30          | 1     |
| TD                          | 4096            | 1     |
| SOLVENT                     | CDCl3           | 104   |
| NS                          | 104             | 1     |
| DS                          | 32              | 1     |
| SH1                         | 7246.377 Hz     | 1     |
| FIDRES                      | 1.69135 Hz      | 1     |
| F1 - Acquisition Parameters |                 |       |
| RG                          | 1149.4          | 1     |
| DM                          | 69.000 usec     | 1     |
| D2                          | 6.00 usec       | 1     |
| D3                          | 300.0 K         | 1     |
| TE                          | 1.5000000 sec   | 1     |
| T1                          | 10.00 usec      | 1     |
| P1                          | 500.1320885 MHz | 1     |
| SFO1                        | 500.1320885 MHz | 1     |
| NULC1                       | 1H              | 1     |
| PL1                         | 0.00 dB         | 1     |
| D2                          | 0.0030000 sec   | 1     |
| D3                          | 7.10 usec       | 1     |
| SFO2                        | 125.7705955 MHz | 1     |
| NULC2                       | 13C             | 1     |
| PL2                         | 2.00 dB         | 1     |
| D6                          | 0.0500000 sec   | 1     |
| D2                          | 0.0000300 sec   | 1     |
| P2                          | 20.00 usec      | 1     |
| IN0                         | 0.00001650 sec  | 1     |
| F1 - Acquisition Parameters |                 |       |
| TD                          | 256             | 1     |
| SFO1                        | 125.771 MHz     | 1     |
| FIDRES                      | 118.371216 Hz   | 1     |
| SN                          | 240.938 ppm     | 1     |
| F2 - Processing Parameters  |                 |       |
| SI                          | 2048            | 1     |
| SF                          | 500.1300135 MHz | 1     |
| MDM                         | OSINE           | 1     |
| SSB                         | 4               | 1     |
| LB                          | 0.00 Hz         | 1     |
| GB                          | 0               | 1     |
| PC                          | 1.00            | 1     |
| F1 - Processing Parameters  |                 |       |
| SI                          | 256             | 1     |
| MC2                         | OF              | 1     |
| SF                          | 125.7577905 MHz | 1     |
| MDM                         | SINE            | 1     |
| SSB                         | 2               | 1     |
| LB                          | 0.00 Hz         | 1     |
| GB                          | 0               | 1     |
| 2D NMR plot parameters      |                 |       |
| CX2                         | 15.00 cm        | 1     |
| CX1                         | 15.00 cm        | 1     |
| F2P2D                       | 1.914 ppm       | 1     |
| F2P1D                       | 957.29 Hz       | 1     |
| F2PHT                       | 0.789 ppm       | 1     |
| F2H1                        | 364.71 Hz       | 1     |
| F1P1D                       | 35.349 ppm      | 1     |
| F1H1                        | 4445.47 Hz      | 1     |
| F1H1T                       | 13.700 ppm      | 1     |
| F1H1M                       | 0.0739 ppm      | 1     |
| F2P2H2                      | 1722.93 Hz      | 1     |
| F2P2H1                      | 0.0739 ppm/cm   | 1     |
| F2P2H2                      | 37.50566 Hz/cm  | 1     |
| F2P2H1                      | 1.44321 ppm/cm  | 1     |
| F1P2H2                      | 161.50252 Hz/cm | 1     |

Figure S22. HMBC spectrum of 2 (expansion)

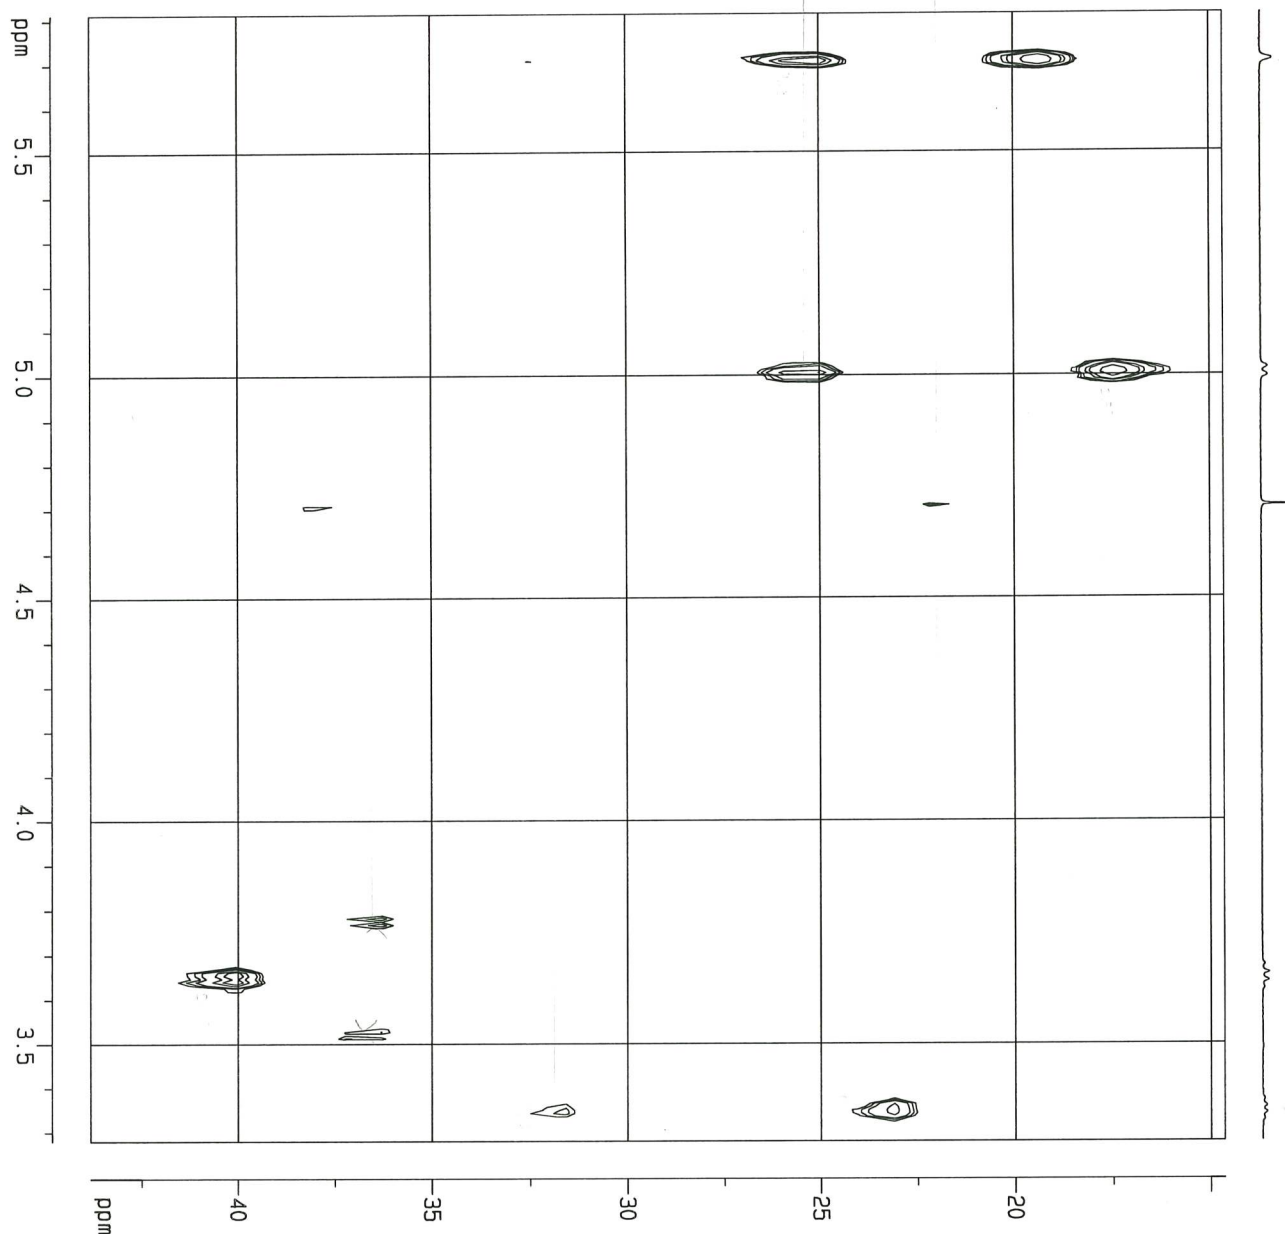

Current Data Parameters

|        |           |
|--------|-----------|
| NAME   | pen2-2m2y |
| EXPNO  | 15        |
| PROCNO | 1         |

F2 - Acquisition Parameters

|         |                 |
|---------|-----------------|
| Date_   | 20020220        |
| Time    | 18.12           |
| INSTRUM | spect           |
| PROBHD  | 5 mm Multinu    |
| PULPROG | inv4iprd        |
| TD      | 4096            |
| SOLVENT | CDCl3           |
| NS      | 104             |
| DS      | 32              |
| SWH     | 7246.377 Hz     |
| FIDRES  | 1.769135 Hz     |
| AQ      | 0.2826740 sec   |
| RG      | 1149.4          |
| DM      | 69.000 usec     |
| DE      | 6.00 usec       |
| TE      | 300.0 K         |
| D1      | 1.50000000 sec  |
| P1      | 10.00 usec      |
| SFO1    | 500.1328885 MHz |
| NUC1    | 1H              |
| PL1     | 0.00 dB         |
| PD      | 0.00300000 sec  |
| P2      | 7.10 usec       |
| SFO2    | 125.7705955 MHz |
| NUC2    | 13C             |
| PL2     | 2.00 dB         |
| PD      | 0.05000000 sec  |
| D0      | 0.00000300 sec  |
| P2      | 20.00 usec      |
| INO     | 0.00001650 sec  |

F1 - Acquisition Parameters

|        |              |
|--------|--------------|
| ND0    | 2            |
| TD     | 256          |
| SFO1   | 125.771 MHz  |
| FIDRES | 118.37216 Hz |
| SW     | 240.938 ppm  |

F2 - Processing Parameters

|     |                 |
|-----|-----------------|
| SI  | 2048            |
| SF  | 500.1300135 MHz |
| WDW | OSINE           |
| SSB | 4               |
| LB  | 0.00 Hz         |
| GB  | 0               |
| PC  | 1.00            |

F1 - Processing Parameters

|     |                 |
|-----|-----------------|
| SI  | 256             |
| MC2 | GF              |
| SF  | 125.7577906 MHz |
| WDW | SINE            |
| SSB | 2               |
| LB  | 0.00 Hz         |
| GB  | 0               |

2D NMR plot parameters

|         |                 |
|---------|-----------------|
| CX2     | 15.00 cm        |
| CX1     | 15.00 cm        |
| F2PUL   | 3.812 ppm       |
| F2LO    | 2306.88 Hz      |
| F2PHI   | 3.280 ppm       |
| F2H1    | 1640.18 Hz      |
| F1PUL   | 43.821 ppm      |
| F1LO    | 5510.81 Hz      |
| F1PHI   | 14.642 ppm      |
| F1H1    | 1841.31 Hz      |
| F2PPOCK | 0.16865 ppm/cm  |
| F2HZCM  | 84.44671 Hz/cm  |
| F1PPOCK | 1.94528 ppm/cm  |
| F1HZCM  | 244.63383 Hz/cm |



Figure S23. NOESY spectrum of 2

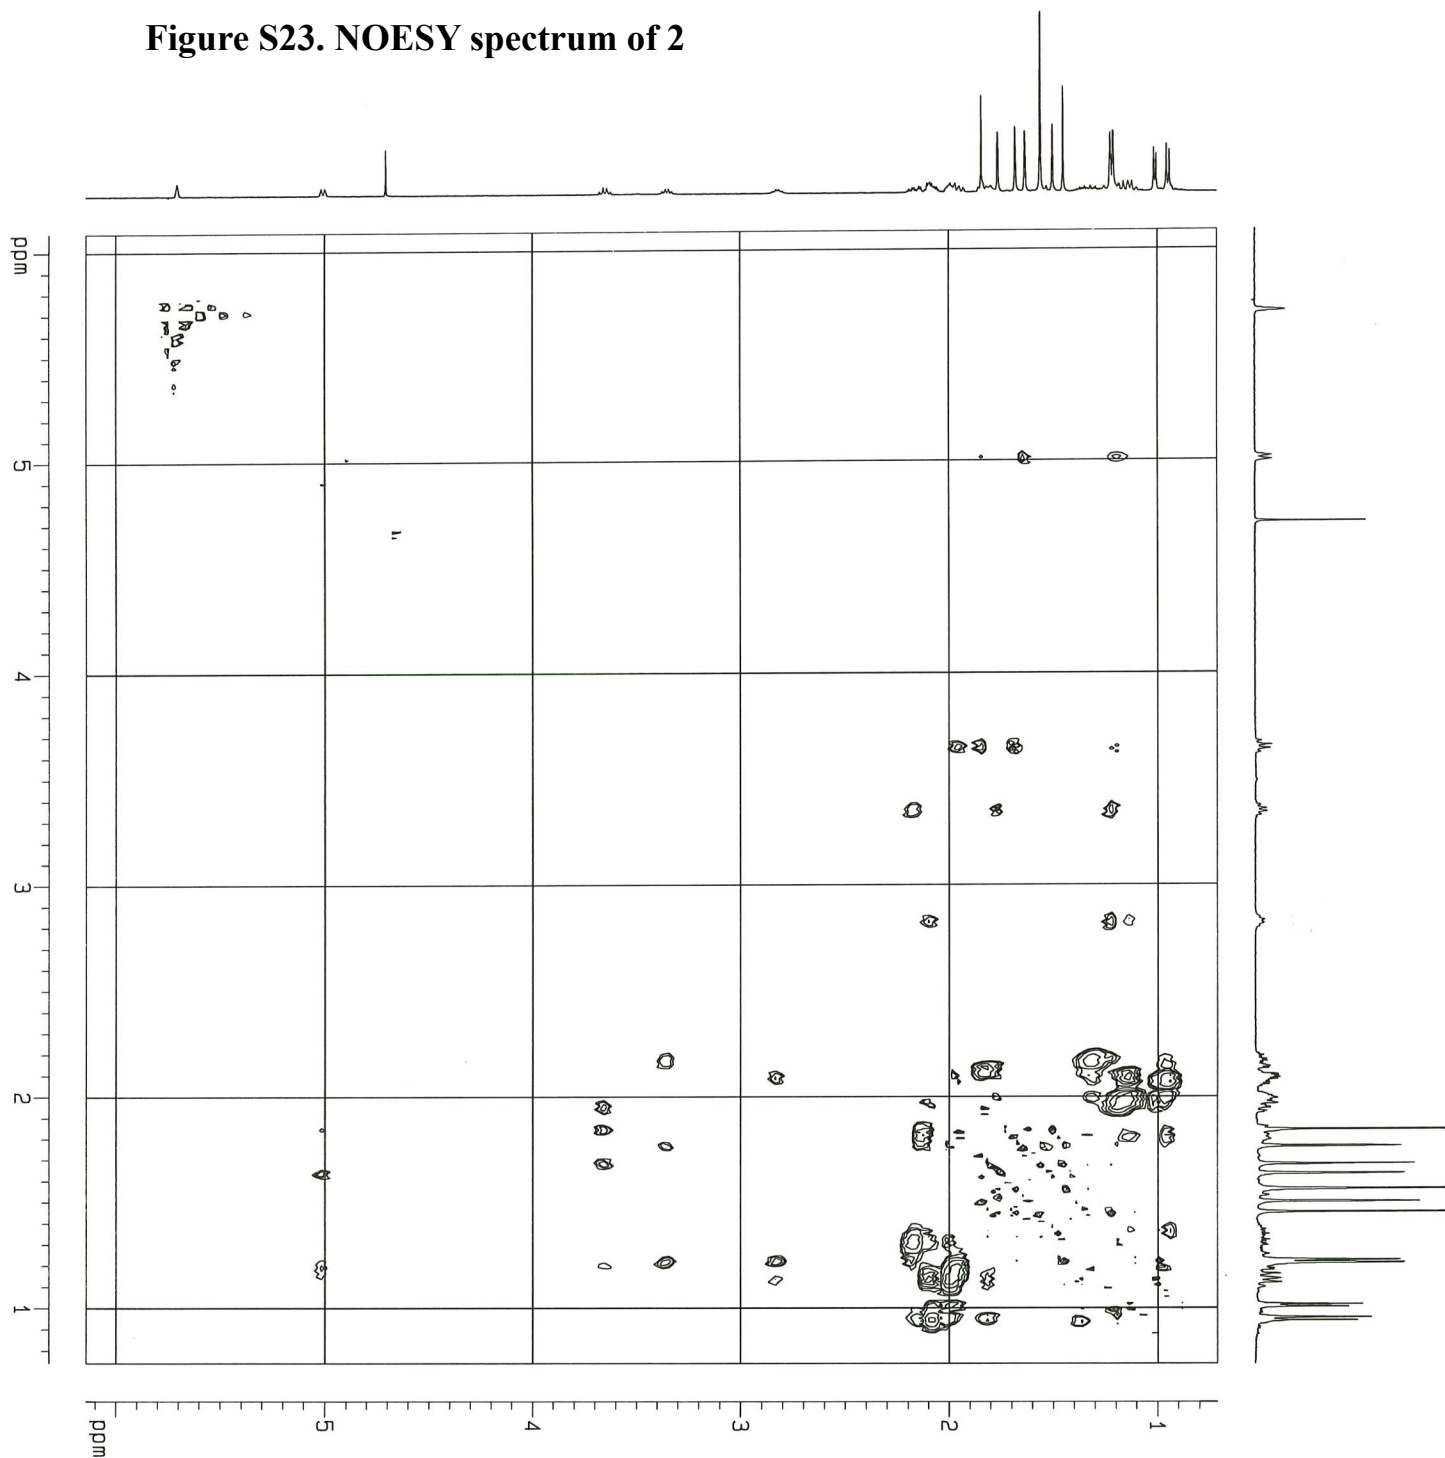

Current Data Parameters

|        |           |
|--------|-----------|
| NAME   | pen2r2m2y |
| EXPNO  | 25        |
| PROCNO | 1         |

F2 - Acquisition Parameters

|         |                |
|---------|----------------|
| Date_   | 20020222       |
| Time    | 18.49          |
| INSTRUM | spect          |
| PROBHD  | 5 mm MUltinu   |
| PULPROG | noesyld        |
| TD      | 1024           |
| SOLVENT | CDCl3          |
| NS      | 72             |
| DS      | 16             |
| SMH     | 7246.377 Hz    |
| FIDRES  | 7.076540 Hz    |
| RG      | 0.0707060 sec  |
| RG      | 128            |
| DW      | 69.000 usec    |
| DE      | 6.00 usec      |
| TE      | 300.0 K        |
| D1      | 2.0000000 sec  |
| P1      | 10.00 usec     |
| SFO1    | 500.132885 MHz |
| NUC1    | 1H             |
| PL1     | 0.00 dB        |
| DO      | 0.0000000 sec  |
| DB      | 0.4100000 sec  |
| INQ     | 0.0000500 sec  |

F1 - Acquisition Parameters

|        |              |
|--------|--------------|
| NDO    | 2            |
| TD     | 256          |
| SFO1   | 500.1329 MHz |
| FIDRES | 28.306160 Hz |
| SM     | 14.489 ppm   |

F2 - Processing Parameters

|     |                 |
|-----|-----------------|
| SI  | 1024            |
| SF  | 500.1300128 MHz |
| WDW | SINE            |
| SSB | 2               |
| LB  | 0.00 Hz         |
| GB  | 0               |
| PC  | 0.00            |

F1 - Processing Parameters

|     |                 |
|-----|-----------------|
| SI  | 512             |
| MC2 | TPPI            |
| SF  | 500.1300128 MHz |
| WDW | SINE            |
| SSB | 2               |
| LB  | 0.00 Hz         |
| GB  | 0               |

2D NMR plot parameters

|        |                 |
|--------|-----------------|
| CX2    | 15.00 cm        |
| CX1    | 15.00 cm        |
| F2PULO | 6.090 ppm       |
| F2LO   | 3045.56 Hz      |
| F2PHI  | 0.741 ppm       |
| F2HI   | 370.63 Hz       |
| F1PULO | 6.146 ppm       |
| F1LO   | 3073.88 Hz      |
| F1PHI  | 0.713 ppm       |
| F1HI   | 356.49 Hz       |
| F2PNUC | 0.35656 ppm/cm  |
| F2H2CM | 178.32881 Hz/cm |
| F1PNUC | 0.36222 ppm/cm  |
| F1H2CM | 181.15941 Hz/cm |

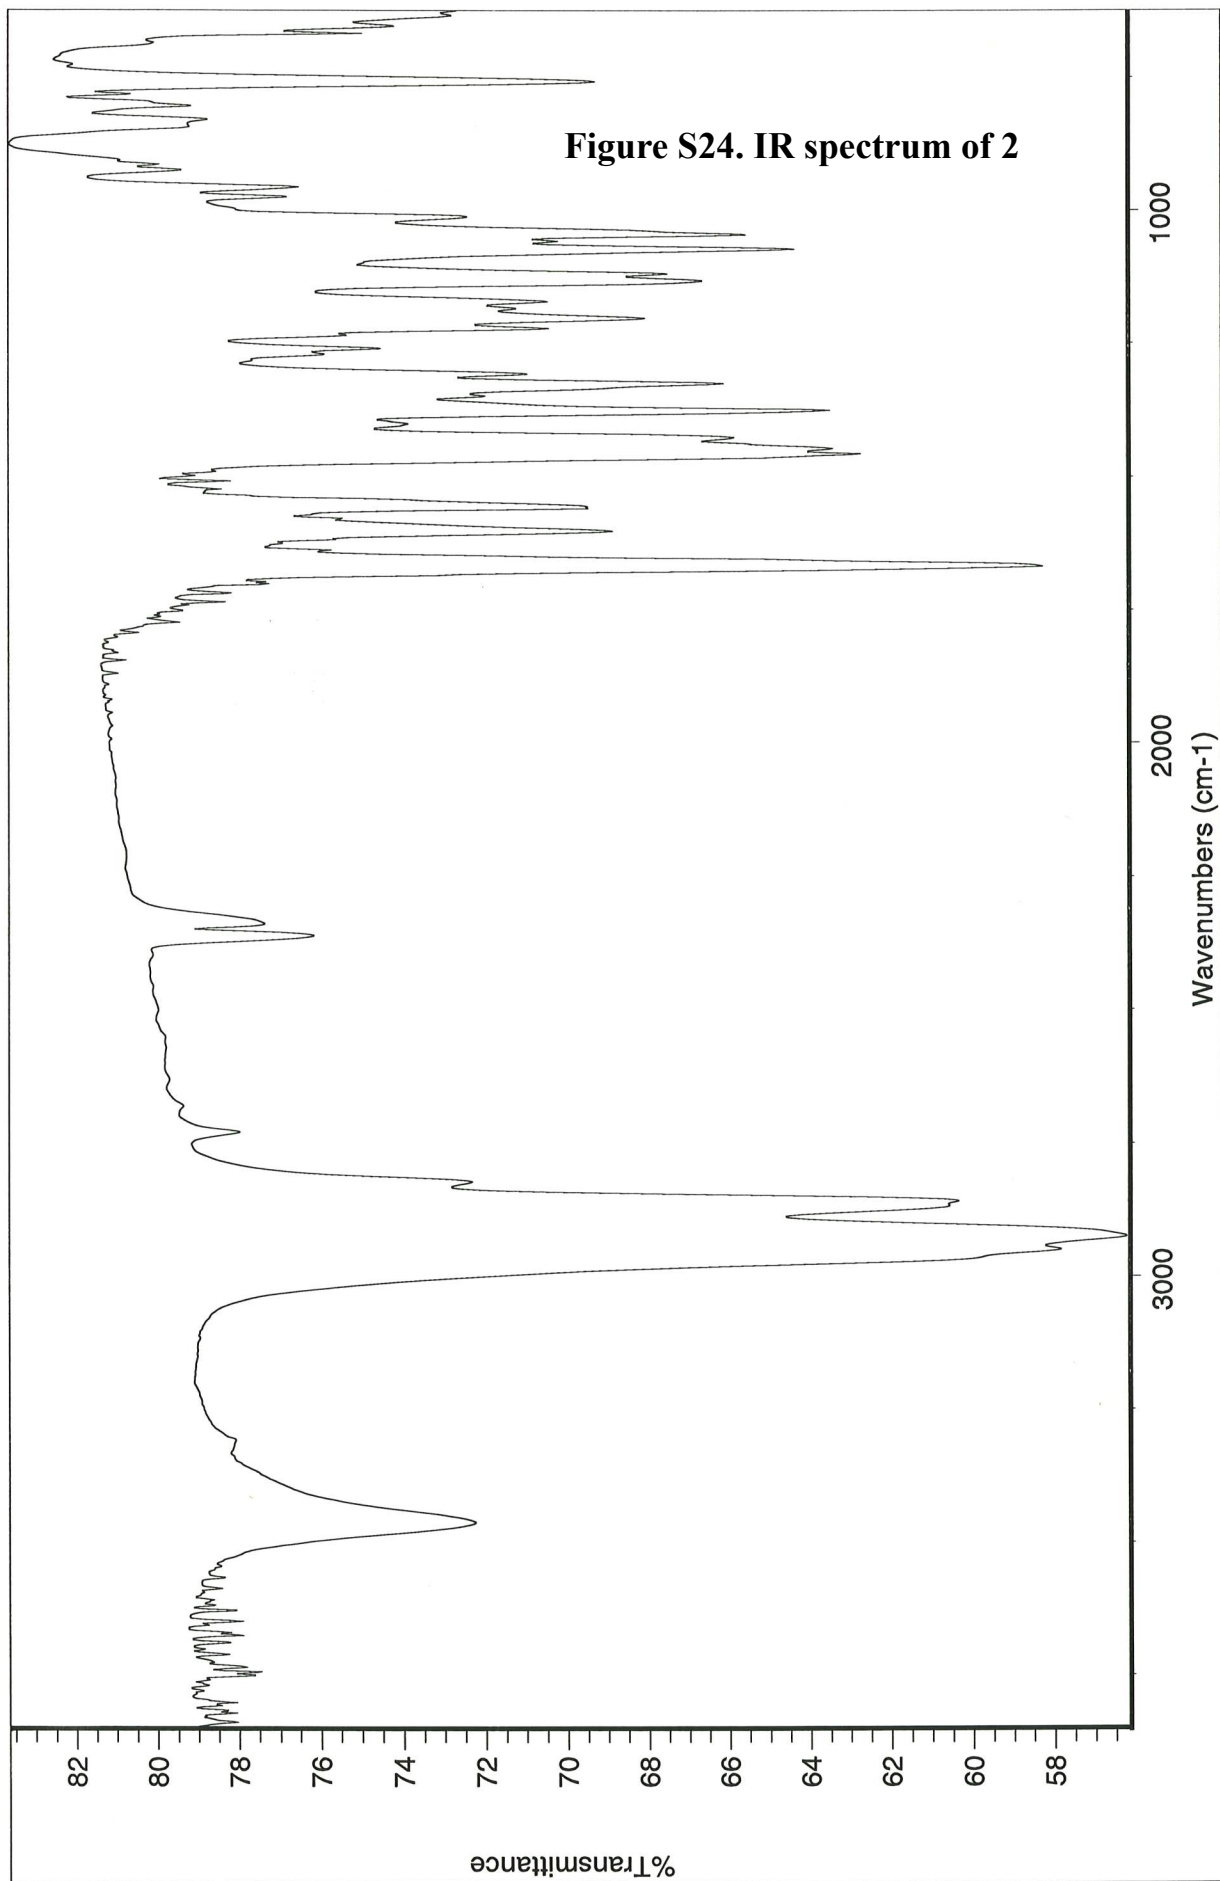

Date: Wed Jul 03 15:33:00 2002

Scans: 64

Resolution: 4.000

Wed Jul 03 15:31:11 2002
